# Supplementary material for: Phospho-DIGE Identified Phosphoproteins Involved in Pathways Related to Tumour Growth in Endometrial Cancer
Source: MDPI journal article supplement (doi:10.3390/ijms241511987), 2023-07-26
Supplement: s1 [file s1]

| Sample type | Age | Diagnosis                  | Grade | Stage | Biological sources | Methodological used          |
|-------------|-----|----------------------------|-------|-------|--------------------|------------------------------|
| Tumor       | 74  | Endometroid adenocarcinoma | G2    | IB    | Tissue             | 2D-DIGE and western-blotting |
| Tumor       | 59  | Endometroid adenocarcinoma | G1    | IA    | Tissue             | 2D-DIGE and western blotting |
| Tumor       | 79  | Endometroid adenocarcinoma | G1    | IB    | Tissue             | 2D-DIGE and western blotting |
| Tumor       | 76  | Endometroid adenocarcinoma | G2    | IB    | Tissue             | 2D-DIGE and western blotting |
| Tumor       | 57  | Endometroid adenocarcinoma | G2    | IB    | Tissue             | 2D-DIGE and western blotting |
| Tumor       | 78  | Endometroid adenocarcinoma | G2    | IB    | Tissue             | 2D-DIGE and western blotting |
| Tumor       | 73  | Endometroid adenocarcinoma | G2    | IA    | Tissue             | 2D-DIGE and western blotting |
| Tumor       | 70  | Endometroid adenocarcinoma | G1    | IB    | Tissue             | 2D-DIGE and western blotting |
| Tumor       | 53  | Endometroid adenocarcinoma | G1    | IA    | Tissue             | Wester blotting              |
| Tumor       | 67  | Endometroid adenocarcinoma | G1    | IB    | Tissue             | Western blotting             |
| Tumor       | 55  | Endometroid adenocarcinoma | G2    | IA    | Tissue             | Western blotting<br>LC-MS/MS |
| Tumor       | 71  | Endometroid adenocarcinoma | G3    | IA    | Tissue             | Western blotting<br>LC/MS-MS |
| Tumor       | 68  | Endometroid adenocarcinoma | G1    | IB    | Tissue             | Western blotting<br>LC/MS-MS |
| Control     | 47  | Leiomyoma                  |       |       | Tissue             | 2D-DIGE and western-blotting |
| Control     | 42  | Leiomyoma                  |       |       | Tissue             | 2D-DIGE and western blotting |
| Control     | 45  | Leiomyoma                  |       |       | Tissue             | 2D-DIGE and western blotting |
| Control     | 40  | Leiomyoma                  |       |       | Tissue             | 2D-DIGE and western blotting |

|         |    |           |  |  |        |                              |
|---------|----|-----------|--|--|--------|------------------------------|
| Control | 32 | Leiomyoma |  |  | Tissue | 2D-DIGE and western blotting |
| Control | 44 | Leiomyoma |  |  | Tissue | 2D-DIGE and western blotting |
| Control | 47 | Leiomyoma |  |  | Tissue | 2D-DIGE and western blotting |
| Control | 42 | Leiomyoma |  |  | Tissue | 2D-DIGE and western blotting |
| Control | 47 | Leiomyoma |  |  | Tissue | Wester blotting              |
| Control | 41 | Leiomyoma |  |  | Tissue | Western blotting             |
| Control | 51 | Leiomyoma |  |  | Tissue | Western blotting             |
| Control | 42 | Leiomyoma |  |  | Tissue | Western blotting             |
| Control | 45 | Leiomyoma |  |  | Tissue | Western blotting             |

**Supplementary Table S1:** Clinico-pathological characteristics of the 26 women enrolled in the study
