# Supplementary material for: Phospho-DIGE Identified Phosphoproteins Involved in Pathways Related to Tumour Growth in Endometrial Cancer
Source: MDPI journal article supplement (doi:10.3390/ijms241511987), 2023-07-26

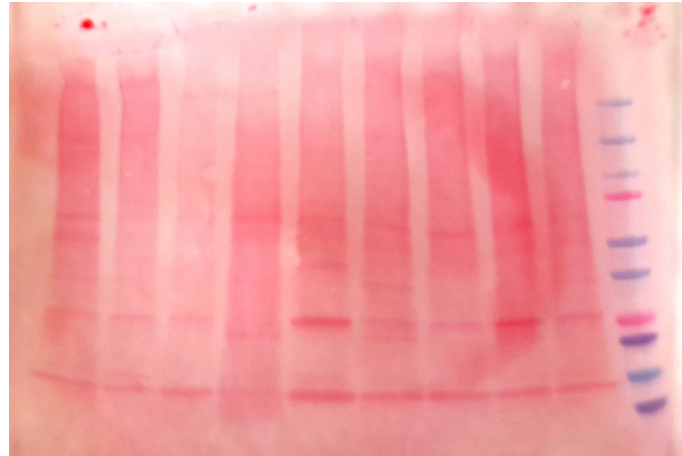

Gel 2

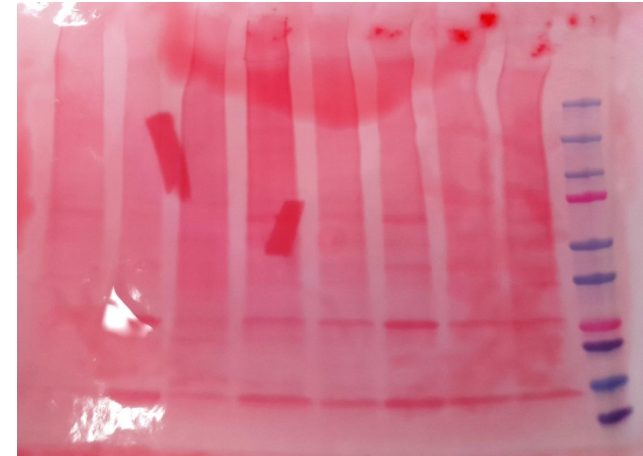

Gel 1

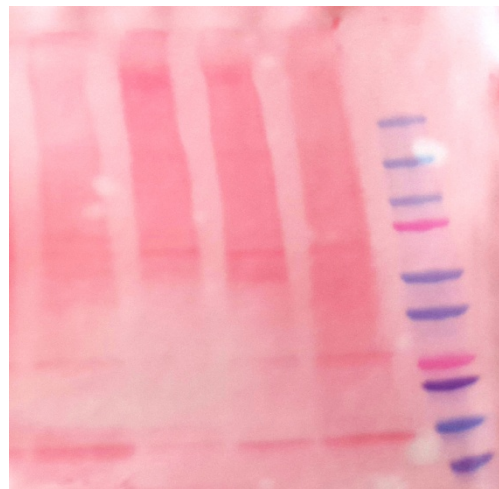

Gel 4

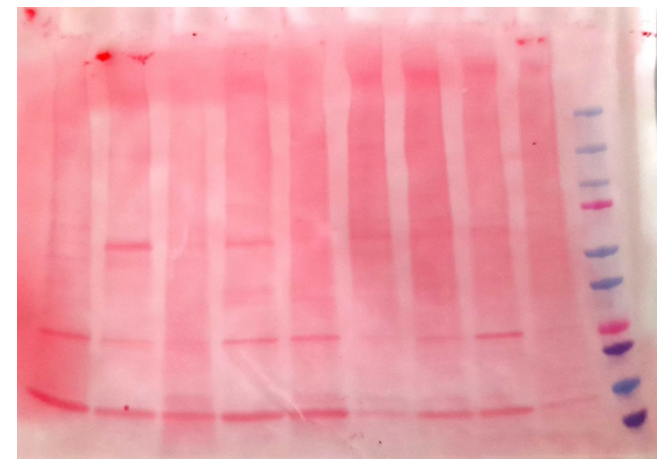

Gel 3

Whole membrane stained with red ponceau

Whole membrane of HBB protein

C-control  
EC- endometrial cancer

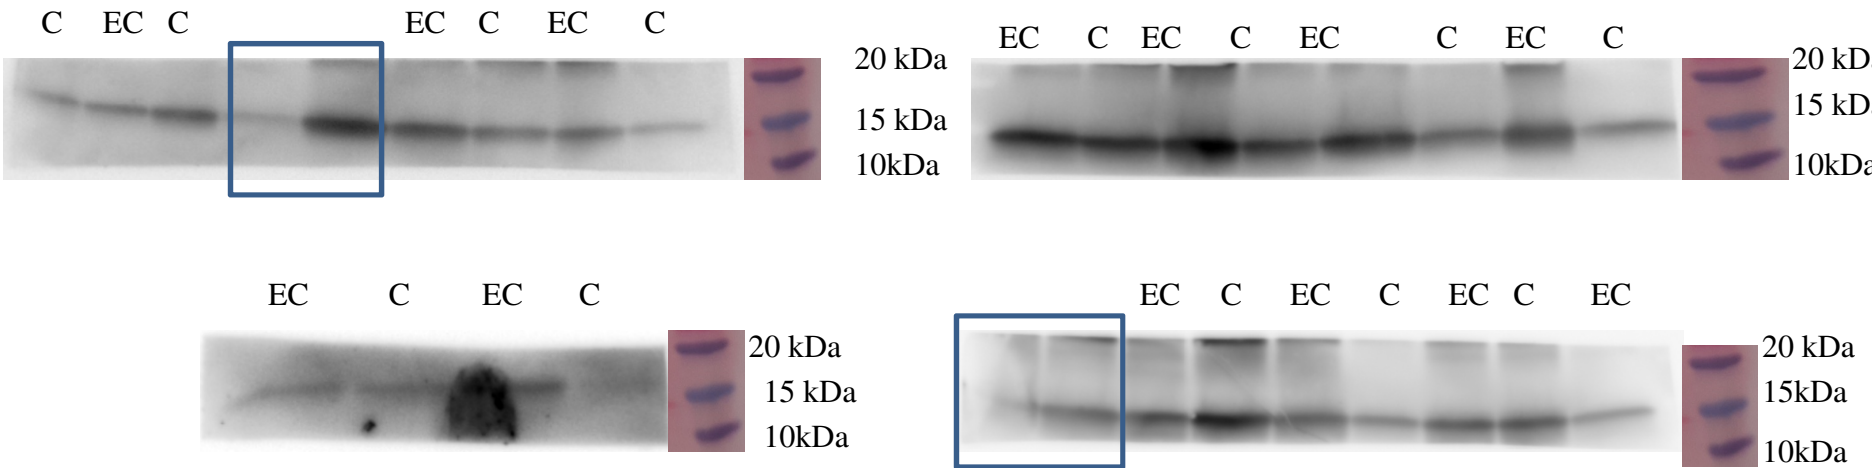

# Whole membrane of HSPB1 protein

C-control  
EC- endometrial cancer

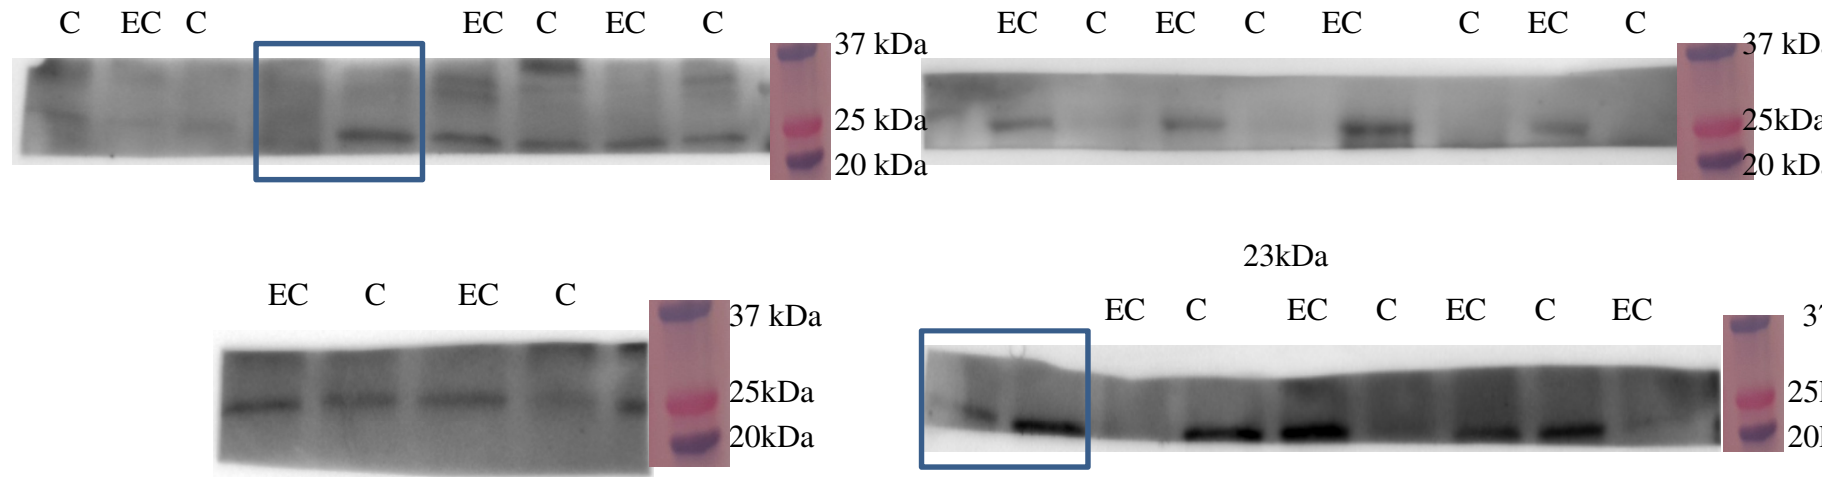

## Whole membrane of CKB protein

C-control  
EC- endometrial cancer

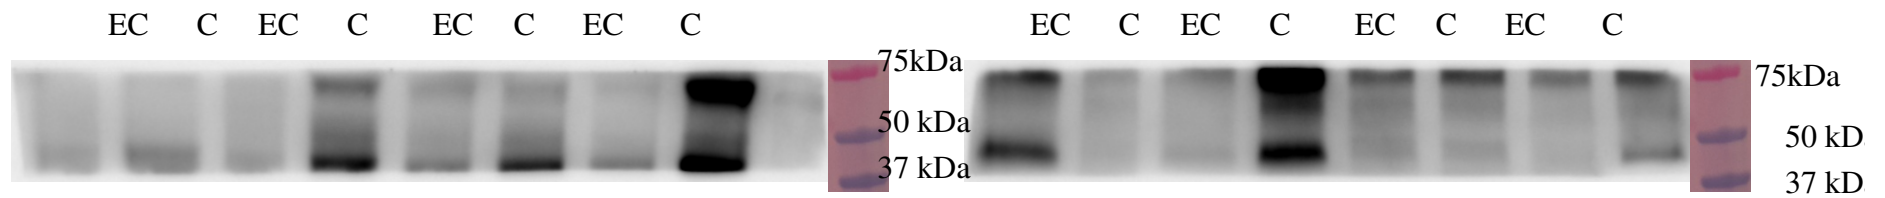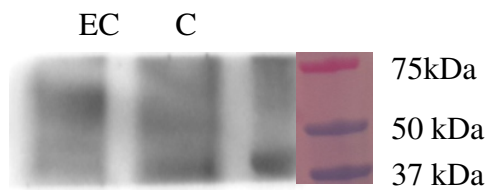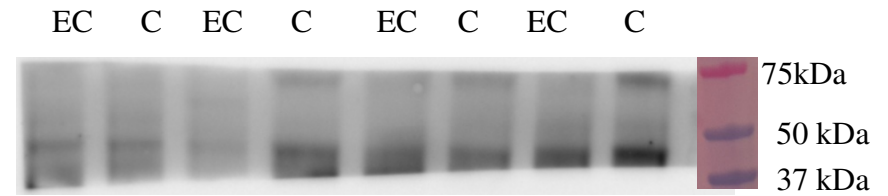

Whole membrane of LDHB protein

C-control  
EC- endometrial cancer

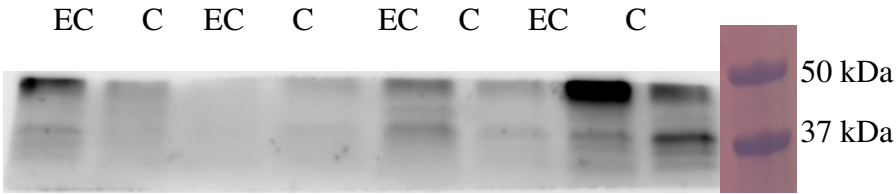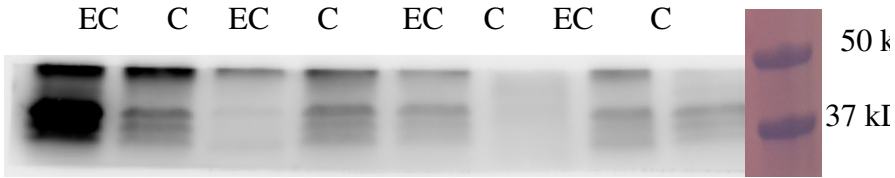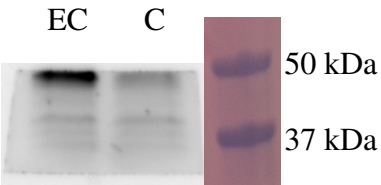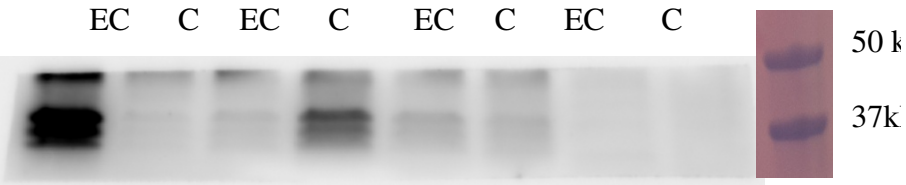

Supplement: s1 [file s1]
