# Supplementary material for: Phospho-DIGE Identified Phosphoproteins Involved in Pathways Related to Tumour Growth in Endometrial Cancer
Source: Int J Mol Sci. 2023 Jul 26;24(15):11987. doi: 10.3390/ijms241511987 (PMC10419128; doi:10.3390/ijms241511987)
Supplement: Supplementary file 1 [file ijms-24-11987-s001.zip]

Archive with 4 entries (4 files):
- Figure S1.pdf
- Supplement Proteomics data Table S2.xlsx
- Supplement Proteomics data Table S3.xlsx
- Supplementary Table S1.pdf
