# Supplementary material for: Phospho-DIGE Identified Phosphoproteins Involved in Pathways Related to Tumour Growth in Endometrial Cancer
Source: Int J Mol Sci. 2023 Jul 26;24(15):11987. doi: 10.3390/ijms241511987 (PMC10419128; doi:10.3390/ijms241511987)
Supplement: Supplementary file 1 [file ijms-24-11987-s001.zip › Supplement Proteomics data Table S2.xlsx]

## Sheet: Foglio1
Spot number	Accession Number	Protein Description	Gene Symbol	p-value		q-value
					Peptide
Spot 6	P61326	Protein mago nashi homolog	MAGOH	0.023	VFYYLVQDLK	0
					IGSLIDVNQSK	0
					IIDDSEITK	0
					FGHEFLEFEFRPDGK	0
					EDDALWPPPDR	0
Spot 16	P04792	Heat shock protein beta-1	HSPB1 1,2	0.045	LATQSNEITIPVTFESR
					LFDQAFGLPR
					KYTLPPGVDPTQVSSSLSPEGTLTVEAPmPK
					VSLDVNHFAPDELTVK
					YTLPPGVDPTQVSSSLSPEGTLTVEAPmPK
					AQLGGPEAAK
					DGVVEITGK
					GPSWDPFR
Spot 37	P07195	L-lactate dehydrogenase B chain	LDHB 1	0.0059
Spot 8	P68871	Hemoglobin subunit beta	HBB 1,2	0.045
Spot 14	P07858	Cathepsin B	CTSB	0.013
Spot 17	P25788	Proteasome subunit alpha type-3	PSMA3 1,2	0.02
Spot 10	Q9UHV9	Prefoldin subunit 2	PFDN2	0.04
Spot 32	P42126	Enoyl-CoA delta isomerase 1, mitochondrial	ECI1	0.0062
Spot 31	P63267	Actin, gamma-enteric smooth muscle	ACTG2 2	0.012
Spot 7	O15511	Actin-related protein 2/3 complex subunit 5	ARPC5 1	0.01
Spot 34	P30040	Endoplasmic reticulum resident protein 29	ERP29 1	0.045
Spot 13	P00738	Haptoglobin	HP	0.0019
Spot 25	Q15084	Protein disulfide-isomerase A6	PDIA6 1,2	0.049
Spot 11	O14558	Heat shock protein beta-6	HSPB6 1	0.0036
Spot 28	P11021	Endoplasmic reticulum chaperone BiP	HSPA5 1,2	0.0023
Spot 47	A0A2R8Y6G6	2-phospho-D-glycerate hydro-lyase	ENO1 1,2	0.035
Spot 51	P31948	Stress-induced-phosphoprotein 1	STIP1 1	0.035
Spot 36	P12429	Annexin A3	ANXA3 1	0.031
Spot 21	P07237	Protein disulfide-isomerase	P4HB 1,2	0.045
Spot 27	P06744	Glucose-6-phosphate isomerase	GPI 1	0.045
Spot 40	P23381	Tryptophan--tRNA ligase, cytoplasmic	WARS1 1	0.0063
Spot 20	P29692	Elongation factor 1-delta	EEF1D 1,2	0.039
Spot 35	P47756	F-actin-capping protein subunit beta	CAPZB 1	0.03
Spot 46	Q14103	Heterogeneous nuclear ribonucleoprotein D0	HNRNPD 1,2	0.0038
Spot 39	Q9UNH7	Sorting nexin-6	SNX6 1	0.045
Spot 38	P23526	Adenosylhomocysteinase	AHCY 1	0.01
Spot 18	P02760	Protein AMBP	AMBP	0.035
Spot 33	O75937	DnaJ homolog subfamily C member 8	DNJC8	0.0045
Spot 2	P10599	Thioredoxin	TXN 1,2	0.045
Spot 49	Q9GZT8	NIF3-like protein 1	NIF3L1	0.045
Spot 44	P23526	Adenosylhomocysteinase	AHCY 1	0.037
Spot 29	P62736	Actin, aortic smooth muscle	ACTA2	0.045
Spot 23	P12277	Creatine kinase B-type	CKB 1	0.0072
Spot 52	P62805	Histone H4	H4C1 2	0.04
