# Supplementary material for: Phospho-DIGE Identified Phosphoproteins Involved in Pathways Related to Tumour Growth in Endometrial Cancer
Source: Int J Mol Sci. 2023 Jul 26;24(15):11987. doi: 10.3390/ijms241511987 (PMC10419128; doi:10.3390/ijms241511987)
Supplement: Supplementary file 1 [file ijms-24-11987-s001.zip › Supplement Proteomics data Table S3.xlsx]

## Sheet: Sheet1
Accession	Description	ΣCoverage	Σ# Proteins	Σ# Unique Peptides	Σ# Peptides	Σ# PSMs	Score A2	Coverage A2	# Peptides A2	# PSM A2	Score B2	Coverage B2	# Peptides B2	# PSM B2	Score C2	Coverage C2	# Peptides C2	# PSM C2	# AAs	MW [kDa]	calc. pI
P68871	Hemoglobin subunit beta OS=Homo sapiens OX=9606 GN=HBB PE=1 SV=2 - [HBB_HUMAN]	82.31	3	5	10	120	898.825	76.87	9	71	53.81	44.9	5	10	463.232	82.31	10	39	147	15.9883	7.28369
	Sequence	# PSMs	# Proteins	# Protein Groups	Protein Group Accessions	Modifications	MH+ [Da]	q-Value	PEP	A2	IonScore A2	Exp Value A2	B2	IonScore B2	Exp Value B2	C2	IonScore C2	Exp Value C2	# Missed Cleavages
	FFESFGDLSTPDAVMGNPK	18	3	1	P68871		2058.95	0	3.936e-16	High	88.03	1.55824e-07	High	24.4	0.359992	High	37.36	0.0180807	0
	VLGAFSDGLAHLDNLK	12	6	2	P68871;P02042		1669.89	0	3.936e-16	High	84.3	2.21435e-07	High	14.07	2.42684	High	65.17	2.05412e-05	0
	GTFATLSELHCDK	5	2	1	P68871	C11(Carbamidomethyl) T5(Phosphorylation)	1478.7	0	3.936e-16	High	82.72	4.15357e-07				High	50.93	0.000644577	0
	VNVDEVGGEALGR	25	3	1	P68871		1314.67	0	3.936e-16	High	77.16	1.3202e-06	High	23.42	0.303705	High	55.62	0.000195885	0
	FFESFGDLSTPDAVMGNPK	3	3	1	P68871	M15(Oxidation)	2074.95	0	3.936e-16	High	61.31	7.20376e-05				High	51.07	0.000709718	0
	SAVTALWGK	5	3	1	P68871		932.52	0	5.793e-14	High	55.22	0.000170595				High	52.7	0.000314432	0
	VVAGVANALAHK	6	2	2	P68871;P02042		1149.67	0	1.059e-07	High	49.5	0.000282188				High	40.79	0.0026261	0
	LLVVYPWTQR	33	7	3	P68871;P02042;P02100		1274.73	0	4.536e-07	High	43.52	0.00152953	High	21.14	0.265735	High	35.26	0.0128225	0
	EFTPPVQAAYQK	6	1	1	P68871		1378.7	0	1.794e-13	High	38.28	0.0109959				High	36.67	0.0164903	0
	LHVDPENFR	4	4	2	P68871;P02042		1126.56	0.001	0.001827	High	33.44	0.0331747				High	28.43	0.109815	0
	VHLTPEEK	3	6	2	P68871;P02042		952.504	0.001	0.004735				High	21.19	0.469121	High	26.25	0.161253	0
P02042	Hemoglobin subunit delta OS=Homo sapiens OX=9606 GN=HBD PE=1 SV=2 - [HBD_HUMAN]	82.31	3	5	10	68	398.07	68.03	8	36	51.76	31.97	4	7	268.248	73.47	9	25	147	16.0453	8.04541
	Sequence	# PSMs	# Proteins	# Protein Groups	Protein Group Accessions	Modifications	MH+ [Da]	q-Value	PEP	A2	IonScore A2	Exp Value A2	B2	IonScore B2	Exp Value B2	C2	IonScore C2	Exp Value C2	# Missed Cleavages
	VLGAFSDGLAHLDNLK	12	6	2	P68871;P02042		1669.89	0	3.936e-16	High	84.3	2.21435e-07	High	14.07	2.42684	High	65.17	2.05412e-05	0
	VNVDAVGGEALGR	2	3	1	P02042		1256.66	0	3.936e-16	High	78.3	8.87465e-07				High	59.94	6.4282e-05	0
	VVAGVANALAHK	6	2	2	P68871;P02042		1149.67	0	1.059e-07	High	49.5	0.000282188				High	40.79	0.0026261	0
	LLVVYPWTQR	33	7	3	P68871;P02042;P02100		1274.73	0	4.536e-07	High	43.52	0.00152953	High	21.14	0.265735	High	35.26	0.0128225	0
	TAVNALWGK	2	3	1	P02042		959.525	0	0.001335	High	37.15	0.0121049				High	44.82	0.00220014	0
	FFESFGDLSSPDAVMGNPK	2	3	1	P02042		2044.93	0	7.016e-12	High	32.96	0.0465359				High	21.88	0.603879	0
	GTFSQLSELHCDK	2	3	1	P02042	C11(Carbamidomethyl)	1521.7	0	0.03438				High	34.01	0.0290148				0
	EFTPQMQAAYQK	2	1	1	P02042		1441.68	0.001	0.001827	High	36.62	0.0194252				High	16.44	1.97819	0
	LHVDPENFR	4	4	2	P68871;P02042		1126.56	0.001	0.001827	High	33.44	0.0331747				High	28.43	0.109815	0
	VHLTPEEK	3	6	2	P68871;P02042		952.504	0.001	0.004735				High	21.19	0.469121	High	26.25	0.161253	0
G3V1N2	HCG1745306, isoform CRA_a OS=Homo sapiens OX=9606 GN=HBA2 PE=1 SV=1 - [G3V1N2_HUMAN]	68.18	1	1	7	39	201.649	68.18	6	26						0			110	11.9402	8.76318
	Sequence	# PSMs	# Proteins	# Protein Groups	Protein Group Accessions	Modifications	MH+ [Da]	q-Value	PEP	A2	IonScore A2	Exp Value A2	B2	IonScore B2	Exp Value B2	C2	IonScore C2	Exp Value C2	# Missed Cleavages
	FLASVSTVLTSK	2	2	2	P69905;G3V1N2		1252.72	0	3.936e-16	High	61.94	2.05675e-05				High	51.35	0.000253191	0
	TYFPHFDLSHGSAQVK	5	3	2	P69905;G3V1N2		1833.89	0	3.936e-16	High	57.66	0.000171224				High	27.32	0.185353	0
	MFLSFPTTK	23	3	2	P69905;G3V1N2		1071.55	0	0.001335	High	33.61	0.0216232				High	36.44	0.0114174	0
	VADALTNAVAHVDDMPNALSALSDLHAHK	2	3	2	P69905;G3V1N2	M15(Oxidation)	3012.49	0	0.0004246	High	18.14	1.40417							0
	VADALTNAVAHVDDMPNALSALSDLHAHK	1	3	2	P69905;G3V1N2		2996.49	0	0.0003763	High	11.92	5.65887							0
	LRVDPVNFK	2	3	2	P69905;G3V1N2		1087.63	0.001	0.001827	High	34.09	0.0191072							1
	MFLSFPTTK	2	3	2	P69905;G3V1N2	M1(Oxidation)	1087.55	0.001	0.0009097	High	33.52	0.0281229				High	23.72	0.259867	0
	VDPVNFK	1	3	2	P69905;G3V1N2		818.435	0.001	0.001335							High	29.02	0.0815168	0
	FLSFPTTK	1	1	1	G3V1N2		940.514	0.002	0.01384	High	23.08	0.177626							0
H7C416	Protein phosphatase inhibitor 2 (Fragment) OS=Homo sapiens OX=9606 GN=PPP1R2 PE=1 SV=1 - [H7C416_HUMAN]	64.81	2	1	1	1	22.32	64.81	1	1									54	5.97272	4.70361
	Sequence	# PSMs	# Proteins	# Protein Groups	Protein Group Accessions	Modifications	MH+ [Da]	q-Value	PEP	A2	IonScore A2	Exp Value A2	B2	IonScore B2	Exp Value B2	C2	IonScore C2	Exp Value C2	# Missed Cleavages
	IDEPSTPYHSMMGDDEDACSDTEATEAMAPDILAR	1	2	1	H7C416	C19(Carbamidomethyl); T22(Phospho)	3921.56	0	6.628e-14	High	22.32	0.343477							0
P69905	Hemoglobin subunit alpha OS=Homo sapiens OX=9606 GN=HBA1 PE=1 SV=2 - [HBA_HUMAN]	63.38	2	1	7	56	277.176	63.38	6	35	22.28	16.9	2	3	172.844	41.55	5	18	142	15.2479	8.67529
	Sequence	# PSMs	# Proteins	# Protein Groups	Protein Group Accessions	Modifications	MH+ [Da]	q-Value	PEP	A2	IonScore A2	Exp Value A2	B2	IonScore B2	Exp Value B2	C2	IonScore C2	Exp Value C2	# Missed Cleavages
	VGAHAGEYGAEALER	17	2	1	P69905		1529.74	0	3.936e-16	High	71.91	5.24354e-06	High	23.22	0.382336	High	47.51	0.00139806	0
	FLASVSTVLTSK	2	2	2	P69905;G3V1N2		1252.72	0	3.936e-16	High	61.94	2.05675e-05				High	51.35	0.000253191	0
	TYFPHFDLSHGSAQVK	5	3	2	P69905;G3V1N2		1833.89	0	3.936e-16	High	57.66	0.000171224				High	27.32	0.185353	0
	MFLSFPTTK	24	3	2	P69905;G3V1N2		1071.55	0	0.001335	High	33.61	0.0216232	High	16.06	1.2449	High	36.44	0.0114174	0
	VADALTNAVAHVDDMPNALSALSDLHAHK	2	3	2	P69905;G3V1N2	M15(Oxidation)	3012.49	0	0.0004246	High	18.14	1.40417							0
	VADALTNAVAHVDDMPNALSALSDLHAHK	1	3	2	P69905;G3V1N2		2996.49	0	0.0003763	High	11.92	5.65887							0
	LRVDPVNFK	2	3	2	P69905;G3V1N2		1087.63	0.001	0.001827	High	34.09	0.0191072							1
	MFLSFPTTK	2	3	2	P69905;G3V1N2	M1(Oxidation)	1087.55	0.001	0.0009097	High	33.52	0.0281229				High	23.72	0.259867	0
	VDPVNFK	1	3	2	P69905;G3V1N2		818.435	0.001	0.001335							High	29.02	0.0815168	0
D6RD33	Probable ATP-dependent RNA helicase DDX41 OS=Homo sapiens OX=9606 GN=DDX41 PE=1 SV=1 - [D6RD33_HUMAN]	57.14	4	1	1	1	25.32	57.14	1	1									49	5.64369	4.53857
	Sequence	# PSMs	# Proteins	# Protein Groups	Protein Group Accessions	Modifications	MH+ [Da]	q-Value	PEP	A2	IonScore A2	Exp Value A2	B2	IonScore B2	Exp Value B2	C2	IonScore C2	Exp Value C2	# Missed Cleavages
	TDEVPAGGSRSEAEDEDDEDYVPYVPLR	1	4	1	D6RD33	T1(Phospho)	3190.34	0.005	0.01384	High	25.32	0.277608							1
U3KPU8	Membrane-associated progesterone receptor component 2 OS=Homo sapiens OX=9606 GN=PGRMC2 PE=1 SV=1 - [U3KPU8_HUMAN]	40.91	3	1	1	6	45.34	40.91	1	3					44.71	40.91	1	3	44	5.40746	4.53857
	Sequence	# PSMs	# Proteins	# Protein Groups	Protein Group Accessions	Modifications	MH+ [Da]	q-Value	PEP	A2	IonScore A2	Exp Value A2	B2	IonScore B2	Exp Value B2	C2	IonScore C2	Exp Value C2	# Missed Cleavages
	LLKPGEEPSEYTDEEDTK	5	3	1	U3KPU8	T12(Phospho)	2159.93	0	3.936e-16	High	35.02	0.025843				High	34.57	0.0269187	0
	LLKPGEEPSEYTDEEDTK	1	3	1	U3KPU8	S9(Phospho); T12(Phospho)	2239.9	0.001	0.0009097	High	17.53	0.979268							0
C9JEU5	Fibrinogen gamma chain OS=Homo sapiens OX=9606 GN=FGG PE=1 SV=1 - [C9JEU5_HUMAN]	40.9	3	13	13	24	264.585	40.9	13	16	32.32	4.72	1	2	137.482	11.91	5	6	445	50.2904	6.0874
	Sequence	# PSMs	# Proteins	# Protein Groups	Protein Group Accessions	Modifications	MH+ [Da]	q-Value	PEP	A2	IonScore A2	Exp Value A2	B2	IonScore B2	Exp Value B2	C2	IonScore C2	Exp Value C2	# Missed Cleavages
	DTVQIHDITGK	1	3	1	C9JEU5		1226.64	0	5.303e-14	High	48.76	0.000854152							0
	YLQEIYNSNNQK	2	3	1	C9JEU5		1513.72	0	1.723e-08	High	43.59	0.00400989				High	44.95	0.00272866	0
	YEASILTHDSSIR	2	3	1	C9JEU5		1491.75	0	3.936e-16	High	43.52	0.00372156							0
	VAQLEAQCQEPCK	2	3	1	C9JEU5	C8(Carbamidomethyl); C12(Carbamidomethyl)	1560.71	0	3.5e-07	High	42.15	0.0049342				High	49.57	0.00086615	0
	DNCCILDER	5	3	1	C9JEU5	C3(Carbamidomethyl); C4(Carbamidomethyl)	1194.48	0	4.202e-09	High	42.01	0.00234176				High	60.02	3.82236e-05	0
	VELEDWNGR	2	3	1	C9JEU5		1117.53	0	2.447e-15	High	39.23	0.00654902				High	36.83	0.0119308	0
	FEGNCAEQDGSGWWMNK	1	3	1	C9JEU5	C5(Carbamidomethyl)	2015.81	0	3.936e-16	High	37.28	0.0100362							0
	TSTADYAMFK	2	3	1	C9JEU5		1134.51	0	4.206e-05	High	36.54	0.0131428				High	18.6	0.794411	0
	AIQLTYNPDESSKPNMIDAATLK	1	3	1	C9JEU5		2520.27	0	3.936e-16	High	32.54	0.044547							0
	EGFGHLSPTGTTEFWLGNEK	1	3	1	C9JEU5		2207.04	0	6.206e-07	High	28.7	0.156615							0
	FGSYCPTTCGIADFLSTYQTK	3	3	1	C9JEU5	C5(Carbamidomethyl); C9(Carbamidomethyl)	2417.08	0	0.04546	High	26.79	0.222081	High	32.32	0.062453				0
	ASTPNGYDNGIIWATWK	1	3	1	C9JEU5		1893.91	0	3.535e-09	High	22.22	0.569502							0
	MLEEIMK	1	3	1	C9JEU5		893.447	0.001	0.001121	High	13.45	2.74728							0
E9PLJ3	Cofilin, non-muscle isoform (Fragment) OS=Homo sapiens OX=9606 GN=CFL1 PE=1 SV=1 - [E9PLJ3_HUMAN]	39.24	8	2	2	3	21.5	25.32	1	1	47.94	13.92	1	2					79	9.08474	8.38232
	Sequence	# PSMs	# Proteins	# Protein Groups	Protein Group Accessions	Modifications	MH+ [Da]	q-Value	PEP	A2	IonScore A2	Exp Value A2	B2	IonScore B2	Exp Value B2	C2	IonScore C2	Exp Value C2	# Missed Cleavages
	EILVGDVGQTVDDPYATFVK	1	7	1	E9PLJ3		2166.1	0	1.361e-06	High	21.5	0.618391							0
	YALYDATYETK	2	7	1	E9PLJ3		1337.63	0	0.03503				High	34.08	0.0261863				0
P07355	Annexin A2 OS=Homo sapiens OX=9606 GN=ANXA2 PE=1 SV=2 - [ANXA2_HUMAN]	38.35	14	11	11	14	168.582	38.35	11	11					55.18	11.5	3	3	339	38.5798	7.75244
	Sequence	# PSMs	# Proteins	# Protein Groups	Protein Group Accessions	Modifications	MH+ [Da]	q-Value	PEP	A2	IonScore A2	Exp Value A2	B2	IonScore B2	Exp Value B2	C2	IonScore C2	Exp Value C2	# Missed Cleavages
	AEDGSVIDYELIDQDAR	2	9	1	P07355		1908.88	0	3.936e-16	High	62.83	4.90705e-05				High	15.84	2.46151	0
	TNQELQEINR	2	14	1	P07355		1244.62	0	3.936e-16	High	60.04	7.85234e-05				High	57.17	0.000153493	0
	GVDEVTIVNILTNR	1	6	1	P07355		1542.85	0	2.491e-15	High	52.38	0.000285868							0
	RAEDGSVIDYELIDQDAR	1	9	1	P07355		2064.98	0	1.509e-13	High	39.57	0.0109193							1
	SLYYYIQQDTK	1	2	1	P07355		1421.7	0	0.0003204	High	32.56	0.0446751							0
	DIISDTSGDFRK	1	12	1	P07355		1353.66	0.001	0.0009097	High	35.52	0.0242389							1
	SYSPYDMLESIR	2	6	1	P07355		1460.67	0.001	0.0009097	High	23.65	0.36226				High	21.51	0.553047	0
	TPAQYDASELK	1	9	1	P07355		1222.6	0.001	0.001827	High	21.06	0.610683							0
	GLGTDEDSLIEIICSR	1	14	1	P07355	C14(Carbamidomethyl)	1777.87	0.001	0.0009097	High	14.68	3.41429							0
	WISIMTER	1	9	1	P07355		1035.53	0.002	0.01384	High	19.23	0.831016							0
	LSLEGDHSTPPSAYGSVK	1	7	1	P07355		1844.9	0.006	0.02842	High	17.99	1.58299							0
P02675	Fibrinogen beta chain OS=Homo sapiens OX=9606 GN=FGB PE=1 SV=2 - [FIBB_HUMAN]	38.09	1	13	13	25	226.407	30.96	10	14	21.52	10.18	4	5	55.53	17.11	6	6	491	55.8923	8.26514
	Sequence	# PSMs	# Proteins	# Protein Groups	Protein Group Accessions	Modifications	MH+ [Da]	q-Value	PEP	A2	IonScore A2	Exp Value A2	B2	IonScore B2	Exp Value B2	C2	IonScore C2	Exp Value C2	# Missed Cleavages
	DNENVVNEYSSELEK	3	1	1	P02675		1768.79	0	3.936e-16	High	74.21	3.84056e-06	High	21.52	0.711388	High	36.53	0.0216773	0
	EDGGGWWYNR	2	1	1	P02675		1239.52	0	6.04e-14	High	63.23	1.93461e-05				High	18.01	0.577946	0
	TPCTVSCNIPVVSGK	2	1	1	P02675	C3(Carbamidomethyl); C7(Carbamidomethyl)	1618.79	0	3.936e-16	High	47.55	0.00155049				High	14.22	3.53087	0
	VYCDMNTENGGWTVIQNR	3	1	1	P02675	C3(Carbamidomethyl)	2156.95	0	3.018e-13	High	45.44	0.00279472				High	10.71	7.68084	0
	DNDGWLTSDPR	2	1	1	P02675		1275.56	0	6.664e-09	High	39.46	0.00694161				High	38.99	0.00671923	0
	NYCGLPGEYWLGNDK	2	1	1	P02675	C3(Carbamidomethyl)	1785.79	0	1.388e-08	High	39.12	0.0101092				High	16.28	1.8758	0
	NSVDELNNNVEAVSQTSSSSFQYMYLLK	1	1	1	P02675		3167.49	0	3.936e-16	High	35.25	0.0334512							0
	MGPTELLIEMEDWK	3	1	1	P02675		1691.8	0	3.123e-06	High	25.6	0.242785							0
	YYWGGQYTWDMAK	1	1	1	P02675		1668.72	0	0.0009097	High	20.7	0.658781							0
	QGFGNVATNTDGK	1	1	1	P02675		1308.62	0.001	0.001158	High	28.01	0.119147							0
	NSVDELNNNVEAVSQTSSSSFQYMYLLK	1	1	1	P02675	M24(Oxidation)	3183.48	0.001	0.001305	High	13.32	5.88268							0
	EEAPSLRPAPPPISGGGYR	2	1	1	P02675		1951	0.002	0.0603				High	18.59	1.05013				0
	QDGSVDFGR	1	1	1	P02675		980.444	0.002	0.05506				High	16.88	0.833797				0
	YQISVNK	1	1	1	P02675		851.462	0.004	0.1824				High	18.11	0.629691				0
P60709	Actin, cytoplasmic 1 OS=Homo sapiens OX=9606 GN=ACTB PE=1 SV=1 - [ACTB_HUMAN]	37.6	3	5	10	21	164.537	32	8	11	94.6142	11.2	3	3	57.52	19.73	6	7	375	41.7097	5.47803
	Sequence	# PSMs	# Proteins	# Protein Groups	Protein Group Accessions	Modifications	MH+ [Da]	q-Value	PEP	A2	IonScore A2	Exp Value A2	B2	IonScore B2	Exp Value B2	C2	IonScore C2	Exp Value C2	# Missed Cleavages
	DLYANTVLSGGTTMYPGIADR	3	3	1	P60709		2215.07	0	3.936e-16	High	59.36	0.000123873	High	36.89	0.0219686				0
	VAPEEHPVLLTEAPLNPK	4	3	1	P60709		1954.07	0	3.936e-16	High	54.72	0.000124965				High	22.63	0.242316	0
	SYELPDGQVITIGNER	3	7	2	P63267;P60709		1790.89	0	1.881e-14	High	48.34	0.00137395				High	21.47	0.686477	0
	GYSFTTTAER	1	3	1	P60709		1132.53	0	5.236e-07	High	40.89	0.00484749							0
	QEYDESGPSIVHR	1	2	1	P60709		1516.7	0	2.786e-12	High	28.8	0.103813							0
	AGFAGDDAPR	2	8	2	P60709;P63267		976.449	0	0.01223				High	56.5	0.000116637	High	50.77	0.000427977	0
	DSYVGDEAQSK	2	8	2	P60709;P63267		1198.52	0	0.02212				High	48.01	0.000898149	High	18.92	0.646936	0
	EITALAPSTMK	2	7	2	P63267;P60709		1161.62	0.001	0.001827	High	30.5	0.0654178				High	25.83	0.18899	0
	LCYVALDFEQEMATAASSSSLEK	1	3	1	P60709	C2(Carbamidomethyl)	2550.18	0.001	0.001827	High	21.71	0.692403							0
	DLTDYLMK	2	7	2	P63267;P60709		998.487	0.005	0.01384	High	21.95	0.372427				High	18.59	0.860578	0
J3QSA3	Polyubiquitin-B (Fragment) OS=Homo sapiens OX=9606 GN=UBB PE=1 SV=1 - [J3QSA3_HUMAN]	37.21	21	1	1	2	27.94	37.21	1	1					23.32	37.21	1	1	43	4.85061	5.18604
	Sequence	# PSMs	# Proteins	# Protein Groups	Protein Group Accessions	Modifications	MH+ [Da]	q-Value	PEP	A2	IonScore A2	Exp Value A2	B2	IonScore B2	Exp Value B2	C2	IonScore C2	Exp Value C2	# Missed Cleavages
	TITLEVEPSDTIENVK	2	21	1	J3QSA3		1787.93	0	1.976e-13	High	27.94	0.124458				High	23.32	0.373633	0
H3BTK3	Calcium-regulated heat-stable protein 1 (Fragment) OS=Homo sapiens OX=9606 GN=CARHSP1 PE=1 SV=1 - [H3BTK3_HUMAN]	36.62	7	2	2	2	31.17	36.62	2	2									71	7.66492	10.77
	Sequence	# PSMs	# Proteins	# Protein Groups	Protein Group Accessions	Modifications	MH+ [Da]	q-Value	PEP	A2	IonScore A2	Exp Value A2	B2	IonScore B2	Exp Value B2	C2	IonScore C2	Exp Value C2	# Missed Cleavages
	TFSATVR	1	7	1	H3BTK3	S3(Phospho)	861.387	0.001	0.0009097	High	31.17	0.0252066							0
	ERSPSPLRGNVVPSPLPTR	1	7	1	H3BTK3	S3(Phospho); S5(Phospho); S14(Phospho)	2299.04	0.005	0.01384	High	12.81	5.57634							2
M0R2M5	Transcription elongation factor SPT5 (Fragment) OS=Homo sapiens OX=9606 GN=SUPT5H PE=1 SV=1 - [M0R2M5_HUMAN]	36.27	2	1	1	1	22.01	36.27	1	1									102	11.9348	3.76416
	Sequence	# PSMs	# Proteins	# Protein Groups	Protein Group Accessions	Modifications	MH+ [Da]	q-Value	PEP	A2	IonScore A2	Exp Value A2	B2	IonScore B2	Exp Value B2	C2	IonScore C2	Exp Value C2	# Missed Cleavages
	SAAGSEKEEEPEDEEEEEEEEEYDEEEEEEDDDRPPK	1	2	1	M0R2M5	S5(Phospho)	4494.65	0.001	0.0009097	High	22.01	0.181298							1
P08670	Vimentin OS=Homo sapiens OX=9606 GN=VIM PE=1 SV=4 - [VIME_HUMAN]	35.84	2	15	16	26	243.123	27.25	12	13	67.6086	11.8	5	5	141.774	16.31	7	8	466	53.6191	5.12256
	Sequence	# PSMs	# Proteins	# Protein Groups	Protein Group Accessions	Modifications	MH+ [Da]	q-Value	PEP	A2	IonScore A2	Exp Value A2	B2	IonScore B2	Exp Value B2	C2	IonScore C2	Exp Value C2	# Missed Cleavages
	QVQSLTCEVDALK	2	2	1	P08670	C7(Carbamidomethyl)	1490.75	0	3.936e-16	High	70.25	7.71298e-06				High	21.44	0.621969	0
	LGDLYEEEMR	2	2	1	P08670		1254.57	0	3.936e-16	High	53.32	0.000302864				High	36.01	0.0151244	0
	VELQELNDR	3	2	1	P08670		1115.57	0	6.753e-12	High	51.33	0.000386141				High	39.69	0.00588546	0
	ILLAELEQLK	2	2	1	P08670		1169.71	0	3.936e-16	High	49.76	0.000191812				High	36.07	0.00507939	0
	SLYASSPGGVYATR	2	2	1	P08670	S6(Phospho)	1508.68	0	3.936e-16	High	46.98	0.00136204				High	40.73	0.00572254	0
	DNLAEDIMR	2	2	1	P08670		1076.5	0	2.532e-06	High	44.9	0.00193347				High	50.19	0.000510663	0
	NLQEAEEWYK	1	2	1	P08670		1309.61	0	4.195e-13	High	44.3	0.00283296							0
	EYQDLLNVK	1	2	1	P08670		1121.58	0	7.071e-05	High	41	0.00493675							0
	EEAENTLQSFR	2	2	1	P08670		1323.61	0	1.178e-08	High	38.26	0.0101062				High	45.43	0.00181016	0
	SLYASSPGGVYATR	1	2	1	P08670		1428.71	0	3.936e-16	High	29.32	0.089993							0
	FADLSEAANR	1	2	1	P08670		1093.53	0	0.02489				High	65.37	1.7308e-05				0
	LQEEMLQR	1	2	1	P08670		1046.53	0.001	0.0009403	High	28.5	0.0993014							0
	ETNLDSLPLVDTHSK	2	1	1	P08670	S6(Phospho)	1748.81	0.001	0.001834	High	21.51	0.669236	High	28.62	0.129229				0
	FANYIDK	1	2	1	P08670		870.436	0.002	0.1172				High	15.63	1.25412				0
	FLEQQNK	1	3	2	P05787;P08670		906.468	0.004	0.1886				High	17.09	1.25566				0
	LQDEIQNMK	1	2	1	P08670		1118.55	0.005	0.01384	High	18.81	1.0239							0
	DGQVINETSQHHDDLE	1	1	1	P08670		1836.8	0.007	0.2159				High	11.42	6.23397				0
Q969E4	Transcription elongation factor A protein-like 3 OS=Homo sapiens OX=9606 GN=TCEAL3 PE=1 SV=1 - [TCAL3_HUMAN]	35.5	1	3	3	4					57.8	35.5	3	4					200	22.4886	4.91943
	Sequence	# PSMs	# Proteins	# Protein Groups	Protein Group Accessions	Modifications	MH+ [Da]	q-Value	PEP	A2	IonScore A2	Exp Value A2	B2	IonScore B2	Exp Value B2	C2	IonScore C2	Exp Value C2	# Missed Cleavages
	NEGNLENEGKPEDEVEPDDEGKSDEEEKPDVEGK	2	1	1	Q969E4	S23(Phospho)	3865.59	0	0.014				High	42.1	0.00512699				1
	REDEGEPGDEGQLEDEGSQEK	1	1	1	Q969E4	S18(Phospho)	2412.93	0	0.03292				High	32.74	0.0266852				1
	GTDDSPKDSQEDLQER	1	1	1	Q969E4	S5(Phospho)	1899.76	0.005	0.2029				High	14.09	2.08814				1
H0YEN9	Methylosome subunit pICln (Fragment) OS=Homo sapiens OX=9606 GN=CLNS1A PE=4 SV=1 - [H0YEN9_HUMAN]	34.78	1	1	1	1									27.74	34.78	1	1	23	2.78634	7.25439
	Sequence	# PSMs	# Proteins	# Protein Groups	Protein Group Accessions	Modifications	MH+ [Da]	q-Value	PEP	A2	IonScore A2	Exp Value A2	B2	IonScore B2	Exp Value B2	C2	IonScore C2	Exp Value C2	# Missed Cleavages
	XRTEDSIR	1	1	1	H0YEN9	X1(M); S6(Phospho)	1087.46	0.001	0.00174							High	27.74	0.086826	1
O60814	Histone H2B type 1-K OS=Homo sapiens OX=9606 GN=H2BC12 PE=1 SV=3 - [H2B1K_HUMAN]	33.33	11	1	4	6	34.51	19.05	2	3	0	14.29	2	2	0	7.14	1	1	126	13.8816	10.3159
	Sequence	# PSMs	# Proteins	# Protein Groups	Protein Group Accessions	Modifications	MH+ [Da]	q-Value	PEP	A2	IonScore A2	Exp Value A2	B2	IonScore B2	Exp Value B2	C2	IonScore C2	Exp Value C2	# Missed Cleavages
	AMGIMNSFVNDIFER	2	15	2	O60814;P06899		1743.82	0	2.273e-08	High	23.83	0.373635							0
	ESYSVYVYK	2	10	1	O60814		1137.55	0.001	0.005911	High	29.68	0.0770749				High	20.97	0.545087	0
	QVHPDTGISSK	1	16	2	O60814;P06899		1168.6	0.002	0.07766				High	24.15	0.264984				0
	EIQTAVR	1	15	2	O60814;P06899		816.457	0.005	0.1968				High	24.14	0.315514				0
P06899	Histone H2B type 1-J OS=Homo sapiens OX=9606 GN=H2BC11 PE=1 SV=3 - [H2B1J_HUMAN]	33.33	6	1	4	5	23.83	19.05	2	3	0	14.29	2	2		0			126	13.8956	10.3159
	Sequence	# PSMs	# Proteins	# Protein Groups	Protein Group Accessions	Modifications	MH+ [Da]	q-Value	PEP	A2	IonScore A2	Exp Value A2	B2	IonScore B2	Exp Value B2	C2	IonScore C2	Exp Value C2	# Missed Cleavages
	AMGIMNSFVNDIFER	2	15	2	O60814;P06899		1743.82	0	2.273e-08	High	23.83	0.373635							0
	ESYSIYVYK	1	5	1	P06899		1151.56	0.001	0.001827	High	13.47	3.1642							0
	QVHPDTGISSK	1	16	2	O60814;P06899		1168.6	0.002	0.07766				High	24.15	0.264984				0
	EIQTAVR	1	15	2	O60814;P06899		816.457	0.005	0.1968				High	24.14	0.315514				0
P0DJ93	Small integral membrane protein 13 OS=Homo sapiens OX=9606 GN=SMIM13 PE=3 SV=1 - [SIM13_HUMAN]	32.97	1	1	1	1	30.79	32.97	1	1									91	10.3443	6.66846
	Sequence	# PSMs	# Proteins	# Protein Groups	Protein Group Accessions	Modifications	MH+ [Da]	q-Value	PEP	A2	IonScore A2	Exp Value A2	B2	IonScore B2	Exp Value B2	C2	IonScore C2	Exp Value C2	# Missed Cleavages
	ELVGDTGSQEGDHEPSGSETEEDTSSSPHR	1	1	1	P0DJ93	S16(Phospho); S18(Phospho)	3316.25	0	9.911e-12	High	30.79	0.0338891							0
C9JZW3	Elongation factor 1-beta (Fragment) OS=Homo sapiens OX=9606 GN=EEF1B2 PE=1 SV=1 - [C9JZW3_HUMAN]	31.71	2	2	2	4	39.4433	31.71	2	3	50.87	30.89	1	1					123	13.4345	4.56396
	Sequence	# PSMs	# Proteins	# Protein Groups	Protein Group Accessions	Modifications	MH+ [Da]	q-Value	PEP	A2	IonScore A2	Exp Value A2	B2	IonScore B2	Exp Value B2	C2	IonScore C2	Exp Value C2	# Missed Cleavages
	YGPADVEDTTGSGATDSKDDDDIDLFGSDDEEESEEAK	2	2	1	C9JZW3	S28(Phospho)	4104.59	0	0.00762	High	33.17	0.0242179	High	50.87	0.00042642				1
	DDDDIDLFGSDDEEESEEAKR	2	2	1	C9JZW3	S16(Phospho)	2508.95	0.001	0.001827	High	27.43	0.0685823							1
H0YDD8	60S acidic ribosomal protein P2 (Fragment) OS=Homo sapiens OX=9606 GN=RPLP2 PE=1 SV=1 - [H0YDD8_HUMAN]	31.52	2	2	2	29	158.681	31.52	2	21					98.6304	31.52	2	8	92	9.09046	4.4624
	Sequence	# PSMs	# Proteins	# Protein Groups	Protein Group Accessions	Modifications	MH+ [Da]	q-Value	PEP	A2	IonScore A2	Exp Value A2	B2	IonScore B2	Exp Value B2	C2	IonScore C2	Exp Value C2	# Missed Cleavages
	NIEDVIAQGIGK	2	2	1	H0YDD8		1256.68	0	2.787e-15	High	67.12	1.07137e-05				High	41.78	0.00363399	0
	KEESEESDDDMGFGLFD	22	2	1	H0YDD8	S7(Phospho)	2029.73	0	5.901e-08	High	51.15	0.00019913				High	46.11	0.000563285	1
	KEESEESDDDMGFGLFD	1	2	1	H0YDD8		1949.76	0	2.697e-15	High	31.48	0.0314712							1
	KEESEESDDDMGFGLFD	1	2	1	H0YDD8	S4(Phospho); S7(Phospho)	2109.68	0	0.0006174							High	20.28	0.120477	1
	KEESEESDDDMGFGLFD	2	2	1	H0YDD8	S4(Phospho); S7(Phospho); M11(Oxidation)	2125.68	0.001	0.002283	High	13.38	0.771453				High	11.02	1.00021	1
	KEESEESDDDMGFGLFD	1	2	1	H0YDD8	S4(Phospho); M11(Oxidation)	2045.71	0.009	0.1103							High	16.33	0.509852	1
D6RIU0	Heterogeneous nuclear ribonucleoprotein H (Fragment) OS=Homo sapiens OX=9606 GN=HNRNPH1 PE=1 SV=1 - [D6RIU0_HUMAN]	30.95	17	3	3	7	102.37	30.95	3	4	45.17	9.52	1	1	41.4	9.52	1	2	168	18.6912	5.021
	Sequence	# PSMs	# Proteins	# Protein Groups	Protein Group Accessions	Modifications	MH+ [Da]	q-Value	PEP	A2	IonScore A2	Exp Value A2	B2	IonScore B2	Exp Value B2	C2	IonScore C2	Exp Value C2	# Missed Cleavages
	HTGPNSPDTANDGFVR	5	17	1	D6RIU0	S6(Phospho)	1764.73	0	3.936e-16	High	51.74	0.00043509	High	45.17	0.00197505	High	34.65	0.0200519	0
	EGRPSGEAFVELESEDEVK	1	13	1	D6RIU0	S14(Phospho)	2186.95	0	1.25e-07	High	45.15	0.00269902							0
	STGEAFVQFASQEIAEK	1	8	1	D6RIU0		1841.89	0	1.48e-12	High	25.11	0.304465							0
P62805	Histone H4 OS=Homo sapiens OX=9606 GN=H4C1 PE=1 SV=2 - [H4_HUMAN]	30.1	1	4	4	9	108.982	30.1	4	5					100.277	29.13	3	4	103	11.3604	11.356
	Sequence	# PSMs	# Proteins	# Protein Groups	Protein Group Accessions	Modifications	MH+ [Da]	q-Value	PEP	A2	IonScore A2	Exp Value A2	B2	IonScore B2	Exp Value B2	C2	IonScore C2	Exp Value C2	# Missed Cleavages
	ISGLIYEETR	2	1	1	P62805		1180.62	0	3.936e-16	High	61.17	5.8548e-05				High	42.94	0.00425584	0
	VFLENVIR	2	1	1	P62805		989.578	0	2.568e-05	High	49.06	0.000407262				High	47.22	0.000782391	0
	TVTAMDVVYALK	3	1	1	P62805		1310.7	0	3.936e-16	High	48.81	0.000741129				High	42	0.00407283	0
	TVTAMDVVYALK	1	1	1	P62805	M5(Oxidation)	1326.7	0.001	0.001278	High	30.13	0.0637625							0
	RISGLIYEETR	1	1	1	P62805	S3(Phospho)	1416.69	0.001	0.001827	High	29.46	0.0935929							1
P04792	Heat shock protein beta-1 OS=Homo sapiens OX=9606 GN=HSPB1 PE=1 SV=2 - [HSPB1_HUMAN]	29.76	2	5	5	19	175.568	24.88	4	11	25.16	4.88	1	1	84.82	8.78	2	7	205	22.7685	6.40479
	Sequence	# PSMs	# Proteins	# Protein Groups	Protein Group Accessions	Modifications	MH+ [Da]	q-Value	PEP	A2	IonScore A2	Exp Value A2	B2	IonScore B2	Exp Value B2	C2	IonScore C2	Exp Value C2	# Missed Cleavages
	QLSSGVSEIR	13	2	1	P04792	S3(Phospho)	1155.54	0	3.936e-16	High	66.83	1.60495e-05				High	47.89	0.00117446	0
	LATQSNEITIPVTFESR	1	1	1	P04792		1905.99	0	2.658e-07	High	33.79	0.0290392							0
	GPSWDPFR	3	2	1	P04792	S3(Phospho)	1041.42	0.001	0.0009097	High	35.06	0.00882646				High	27.44	0.0463376	0
	VSLDVNHFAPDELTVK	1	2	1	P04792		1783.92	0.002	0.01384	High	18.58	1.0054							0
	LFDQAFGLPR	1	2	1	P04792		1163.62	0.002	0.06089				High	25.16	0.187293				0
R4GMM6	Ubiquitin-conjugating enzyme E2 E3 OS=Homo sapiens OX=9606 GN=UBE2E3 PE=1 SV=1 - [R4GMM6_HUMAN]	29.73	6	1	1	2	45.83	29.73	1	2									111	12.158	5.16064
	Sequence	# PSMs	# Proteins	# Protein Groups	Protein Group Accessions	Modifications	MH+ [Da]	q-Value	PEP	A2	IonScore A2	Exp Value A2	B2	IonScore B2	Exp Value B2	C2	IonScore C2	Exp Value C2	# Missed Cleavages
	QRSDDESPSTSSGSSDADQRDPAAPEPEEQEER	2	6	1	R4GMM6	S3(Phospho)	3669.47	0	1.576e-14	High	45.31	0.00215384							2
P04406	Glyceraldehyde-3-phosphate dehydrogenase OS=Homo sapiens OX=9606 GN=GAPDH PE=1 SV=3 - [G3P_HUMAN]	29.55	2	7	7	14	147.444	29.55	7	9					56.03	18.81	5	5	335	36.0304	8.45557
	Sequence	# PSMs	# Proteins	# Protein Groups	Protein Group Accessions	Modifications	MH+ [Da]	q-Value	PEP	A2	IonScore A2	Exp Value A2	B2	IonScore B2	Exp Value B2	C2	IonScore C2	Exp Value C2	# Missed Cleavages
	LISWYDNEFGYSNR	2	2	1	P04406		1763.8	0	3.936e-16	High	50.78	0.00079048				High	23.7	0.382002	0
	IISNASCTTNCLAPLAK	2	2	1	P04406	C7(Carbamidomethyl); C11(Carbamidomethyl)	1833.92	0	3.936e-16	High	49.52	0.00102361				High	19.23	1.19459	0
	WGDAGAEYVVESTGVFTTMEK	3	2	1	P04406		2277.04	0	3.936e-16	High	46.78	0.00223957							0
	VPTANVSVVDLTCR	2	2	1	P04406	C13(Carbamidomethyl)	1530.79	0	1.167e-12	High	36.36	0.0159186				High	50.83	0.000608377	0
	GALQNIIPASTGAAK	1	2	1	P04406		1411.79	0	4.406e-05	High	22.14	0.238878							0
	LVINGNPITIFQER	2	1	1	P04406		1613.89	0.001	0.001336	High	19.22	0.53973				High	12.83	2.41313	0
	LVINGNPITIFQERDPSK	2	1	1	P04406		2041.11	0.001	0.001827	High	14.28	1.43141				High	19.11	0.549893	1
A0A0C4DGB6	Albumin OS=Homo sapiens OX=9606 GN=ALB PE=1 SV=1 - [A0A0C4DGB6_HUMAN]	29.3	8	14	14	17	139.405	22.02	9	9	61.16	7.28	5	6	35.9	3.81	2	2	604	69.1814	6.3667
	Sequence	# PSMs	# Proteins	# Protein Groups	Protein Group Accessions	Modifications	MH+ [Da]	q-Value	PEP	A2	IonScore A2	Exp Value A2	B2	IonScore B2	Exp Value B2	C2	IonScore C2	Exp Value C2	# Missed Cleavages
	LVNEVTEFAK	2	4	1	A0A0C4DGB6		1149.62	0	6.858e-16	High	61.27	4.72129e-05				High	19.19	0.798939	0
	QNCELFEQLGEYK	2	7	1	A0A0C4DGB6	C3(Carbamidomethyl)	1657.75	0	3.936e-16	High	54.45	0.000295752				High	35.9	0.0205375	0
	AVMDDFAAFVEK	1	7	1	A0A0C4DGB6		1342.64	0	1.779e-07	High	47.71	0.00131904							0
	SHCIAEVENDEMPADLPSLAADFVESK	1	6	1	A0A0C4DGB6	C3(Carbamidomethyl)	2974.35	0	3.936e-16	High	31.3	0.0826561							0
	YICENQDSISSK	1	6	1	A0A0C4DGB6	C3(Carbamidomethyl)	1443.64	0	3.936e-16	High	29.74	0.0721953							0
	VFDEFKPLVEEPQNLIK	1	7	1	A0A0C4DGB6		2045.1	0	5.108e-16	High	20.85	0.373298							0
	TCVADESAENCDK	2	4	1	A0A0C4DGB6	C2(Carbamidomethyl); C11(Carbamidomethyl)	1498.58	0	0.02017				High	48.72	0.000458554				0
	FQNALLVR	1	7	1	A0A0C4DGB6		960.563	0.001	0.00178	High	32.96	0.0213964							0
	LVRPEVDVMCTAFHDNEETFLK	1	4	1	A0A0C4DGB6	C10(Carbamidomethyl)	2650.27	0.001	0.001827	High	11.14	8.32968							0
	YLYEIAR	1	4	1	A0A0C4DGB6		927.494	0.002	0.06652				High	31.94	0.0299076				0
	LCTVATLR	1	4	1	A0A0C4DGB6	C2(Carbamidomethyl)	933.518	0.002	0.1306				High	21.09	0.473824				0
	DLGEENFK	1	4	1	A0A0C4DGB6		951.443	0.002	0.1648				High	11.61	3.25448				0
	DDNPNLPR	1	4	1	A0A0C4DGB6		940.449	0.004	0.1777				High	17.02	1.60973				0
	AAFTECCQAADK	1	5	1	A0A0C4DGB6	C6(Carbamidomethyl); C7(Carbamidomethyl)	1371.57	0.005	0.01384	High	17.1	0.842333							0
Q9H1E3	Nuclear ubiquitous casein and cyclin-dependent kinase substrate 1 OS=Homo sapiens OX=9606 GN=NUCKS1 PE=1 SV=1 - [NUCKS_HUMAN]	29.22	1	8	8	32	225.234	29.22	7	18	47.8	18.52	3	3	115.492	18.93	6	11	243	27.28	5.08447
	Sequence	# PSMs	# Proteins	# Protein Groups	Protein Group Accessions	Modifications	MH+ [Da]	q-Value	PEP	A2	IonScore A2	Exp Value A2	B2	IonScore B2	Exp Value B2	C2	IonScore C2	Exp Value C2	# Missed Cleavages
	VVDYSQFQESDDADEDYGR	7	1	1	Q9H1E3	S10(Phospho)	2317.88	0	3.936e-16	High	56.6	0.00010009				High	37.65	0.00719804	0
	VVDYSQFQESDDADEDYGRDSGPPTK	5	1	1	Q9H1E3	S10(Phospho)	3000.21	0	3.936e-16	High	52.76	0.000355404	High	14.45	2.30069	High	25.97	0.147711	1
	EMLMEDVGSEEEQEEEDEAPFQEK	2	1	1	Q9H1E3	S9(Phospho)	2937.12	0	3.936e-16	High	47.78	0.000806948							0
	TPSPKEEDEEPESPPEK	6	1	1	Q9H1E3	S13(Phospho)	2004.82	0	2.612e-10	High	35.01	0.0214067				High	58.19	0.000100732	1
	KVVDYSQFQESDDADEDYGRDSGPPTK	3	1	1	Q9H1E3	S11(Phospho)	3128.3	0	0.02172	High	33.12	0.0386123	High	47.8	0.00133431	High	18.19	1.13172	2
	TPSPKEEDEEPESPPEKK	3	1	1	Q9H1E3	S13(Phospho)	2132.93	0	8.5e-05	High	26.27	0.20902	High	18.97	1.12377				2
	EKTPSPKEEDEEPESPPEK	2	1	1	Q9H1E3	T3(Phospho); S5(Phospho)	2341.94	0	3.691e-09	High	20.23	0.566206				High	20.04	0.526132	2
	KVVDYSQFQESDDADEDYGR	1	1	1	Q9H1E3	S11(Phospho)	2445.96	0	1.123e-07							High	29.75	0.0594241	1
	EKTPSPKEEDEEPESPPEK	3	1	1	Q9H1E3	T3(Phospho); S5(Phospho); S15(Phospho)	2421.91	0.001	0.001827	High	16.64	0.776038				High	12.71	1.59935	2
E9PQA1	Chromosome 11 open reading frame 58 OS=Homo sapiens OX=9606 GN=C11orf58 PE=1 SV=1 - [E9PQA1_HUMAN]	29.07	3	4	4	13	188.1	29.07	4	7					45.41	29.07	3	6	86	9.6219	9.40771
	Sequence	# PSMs	# Proteins	# Protein Groups	Protein Group Accessions	Modifications	MH+ [Da]	q-Value	PEP	A2	IonScore A2	Exp Value A2	B2	IonScore B2	Exp Value B2	C2	IonScore C2	Exp Value C2	# Missed Cleavages
	SASPDDDLGSSNWEAADLGNEER	4	3	1	E9PQA1	S1(Phospho)	2514.99	0	3.936e-16	High	96.35	1.23865e-08				High	24.1	0.19355	0
	RSASPDDDLGSSNWEAADLGNEER	4	3	1	E9PQA1	S4(Phospho)	2671.09	0	2.176e-15	High	49.13	0.000915739				High	23.68	0.285199	1
	SASPDDDLGSSNWEAADLGNEERK	4	3	1	E9PQA1	S3(Phospho)	2643.09	0	3.936e-16	High	39.01	0.00965259				High	27.5	0.128747	1
	RSASPDDDLGSSNWEAADLGNEERK	1	3	1	E9PQA1	S4(Phospho)	2799.19	0	1.228e-07	High	33.33	0.041249							2
H3BNI5	Cytochrome c oxidase subunit 4 isoform 1, mitochondrial (Fragment) OS=Homo sapiens OX=9606 GN=COX4I1 PE=1 SV=1 - [H3BNI5_HUMAN]	27.91	5	1	1	1					36.04	27.91	1	1					43	4.82648	9.0415
	Sequence	# PSMs	# Proteins	# Protein Groups	Protein Group Accessions	Modifications	MH+ [Da]	q-Value	PEP	A2	IonScore A2	Exp Value A2	B2	IonScore B2	Exp Value B2	C2	IonScore C2	Exp Value C2	# Missed Cleavages
	SEDFSLPAYMDR	1	5	1	H3BNI5		1430.62	0.002	0.161				High	36.04	0.0169989				0
H3BPM9	Hepatoma-derived growth factor-related protein 3 (Fragment) OS=Homo sapiens OX=9606 GN=HDGFL3 PE=1 SV=1 - [H3BPM9_HUMAN]	27.66	2	1	1	1	35.33	27.66	1	1									141	15.4994	5.21143
	Sequence	# PSMs	# Proteins	# Protein Groups	Protein Group Accessions	Modifications	MH+ [Da]	q-Value	PEP	A2	IonScore A2	Exp Value A2	B2	IonScore B2	Exp Value B2	C2	IonScore C2	Exp Value C2	# Missed Cleavages
	FTGYQAIQQQSSSETEGEGGNTADASSEEEGDRVEEDGK	1	2	1	H3BPM9	S26(Phospho); S27(Phospho)	4282.68	0	2.661e-12	High	35.33	0.0158268							1
Q96KK5	Histone H2A type 1-H OS=Homo sapiens OX=9606 GN=H2AC12 PE=1 SV=3 - [H2A1H_HUMAN]	27.34	15	1	3	5	43.26	27.34	3	3					42.104	12.5	2	2	128	13.8978	10.8872
	Sequence	# PSMs	# Proteins	# Protein Groups	Protein Group Accessions	Modifications	MH+ [Da]	q-Value	PEP	A2	IonScore A2	Exp Value A2	B2	IonScore B2	Exp Value B2	C2	IonScore C2	Exp Value C2	# Missed Cleavages
	AGLQFPVGR	2	19	2	Q96KK5;C9J0D1		944.532	0.001	0.001827	High	43.26	0.00329028				High	41.63	0.0048507	0
	HLQLAIR	2	19	2	Q96KK5;C9J0D1		850.52	0.001	0.009045	High	17.12	0.214468				High	28.56	0.0229174	0
	VTIAQGGVLPNIQAVLLPK	1	12	1	Q96KK5		1931.17	0.001	0.0009097	High	12.78	0.163441							0
G3V5V7	Heterogeneous nuclear ribonucleoproteins C1/C2 (Fragment) OS=Homo sapiens OX=9606 GN=HNRNPC PE=1 SV=1 - [G3V5V7_HUMAN]	26.67	6	3	3	25	297.96	26.67	3	13	75.85	21.11	2	9	49.9	21.11	2	3	180	20.2417	4.70361
	Sequence	# PSMs	# Proteins	# Protein Groups	Protein Group Accessions	Modifications	MH+ [Da]	q-Value	PEP	A2	IonScore A2	Exp Value A2	B2	IonScore B2	Exp Value B2	C2	IonScore C2	Exp Value C2	# Missed Cleavages
	MESEGGADDSAEEGDLLDDDDNEDRGDDQLELIK	3	6	1	G3V5V7	M1(Oxidation); S10(Phospho)	3806.49	0	3.936e-16	High	94.01	2.40499e-08	High	19.2	0.737589	High	44.87	0.00184261	1
	MESEGGADDSAEEGDLLDDDDNEDRGDDQLELIKDDEK	1	6	1	G3V5V7	S3(Phospho); S10(Phospho)	4357.66	0	5e-12	High	82.51	2.46581e-07							2
	MESEGGADDSAEEGDLLDDDDNEDRGDDQLELIK	6	6	1	G3V5V7	S10(Phospho)	3790.5	0	3.936e-16	High	81.12	4.57427e-07	High	37	0.0115027	High	26.53	0.112833	1
	MESEGGADDSAEEGDLLDDDDNEDRGDDQLELIKDDEK	9	6	1	G3V5V7	S10(Phospho)	4277.69	0	3.936e-16	High	78.85	7.67565e-07	High	12.63	2.99075	High	21.74	0.328243	2
	VDSLLENLEK	1	6	1	G3V5V7		1159.62	0	0.0001994	High	31.69	0.0472994							0
	MESEGGADDSAEEGDLLDDDDNEDRGDDQLELIKDDEK	3	6	1	G3V5V7	M1(Oxidation); S10(Phospho)	4293.69	0	0.00306	High	23.12	0.273747	High	55.9	0.000142528				2
	MESEGGADDSAEEGDLLDDDDNEDRGDDQLELIK	1	6	1	G3V5V7	S3(Phospho); S10(Phospho)	3870.46	0	0.0009097	High	22.41	0.250315							1
	MESEGGADDSAEEGDLLDDDDNEDRGDDQLELIKDDEK	1	6	1	G3V5V7	M1(Oxidation); S3(Phospho); S10(Phospho)	4373.65	0	0.03655				High	22.34	0.236004				2
P14618	Pyruvate kinase PKM OS=Homo sapiens OX=9606 GN=PKM PE=1 SV=4 - [KPYM_HUMAN]	26.55	2	8	8	8	85.78	20.34	6	6	30.65	6.21	2	2					531	57.9	7.84033
	Sequence	# PSMs	# Proteins	# Protein Groups	Protein Group Accessions	Modifications	MH+ [Da]	q-Value	PEP	A2	IonScore A2	Exp Value A2	B2	IonScore B2	Exp Value B2	C2	IonScore C2	Exp Value C2	# Missed Cleavages
	DPVQEAWAEDVDLR	1	2	1	P14618		1642.77	0	3.936e-16	High	41.66	0.00603529							0
	GVNLPGAAVDLPAVSEK	1	2	1	P14618		1636.89	0	3.936e-16	High	37.47	0.0101438							0
	LDIDSPPITAR	1	2	1	P14618		1197.65	0	0.0009097	High	33.85	0.0215321							0
	TATESFASDPILYRPVAVALDTK	1	1	1	P14618		2465.29	0	0.0001648	High	32.05	0.0355529							0
	GADFLVTEVENGGSLGSK	1	2	1	P14618		1779.88	0	1.908e-12	High	30.63	0.0749495							0
	AEGSDVANAVLDGADCIMLSGETAK	1	2	1	P14618	C16(Carbamidomethyl)	2494.15	0.001	0.001827	High	12.73	5.80002							0
	GDLGIEIPAEK	1	2	1	P14618		1141.61	0.002	0.1042				High	29.33	0.0506979				0
	LAPITSDPTEATAVGAVEASFK	1	2	1	P14618		2175.12	0.002	0.06838				High	18.82	1.0537				0
P62937	Peptidyl-prolyl cis-trans isomerase A OS=Homo sapiens OX=9606 GN=PPIA PE=1 SV=2 - [PPIA_HUMAN]	26.06	1	4	4	6	73.46	26.06	4	4					57.32	15.15	2	2	165	18.0009	7.81104
	Sequence	# PSMs	# Proteins	# Protein Groups	Protein Group Accessions	Modifications	MH+ [Da]	q-Value	PEP	A2	IonScore A2	Exp Value A2	B2	IonScore B2	Exp Value B2	C2	IonScore C2	Exp Value C2	# Missed Cleavages
	FEDENFILK	1	1	1	P62937		1154.57	0	1.317e-05	High	48.75	0.000958802							0
	EGMNIVEAMER	2	1	1	P62937		1278.58	0	1.146e-06	High	38.28	0.00919794				High	34.91	0.0205332	0
	IIPGFMCQGGDFTR	2	1	1	P62937	C7(Carbamidomethyl)	1598.74	0	4.034e-13	High	27.89	0.14955				High	46.91	0.00175287	0
	VSFELFADK	1	1	1	P62937		1055.54	0.001	0.0009097	High	32.79	0.0259853							0
F8VZJ2	Nascent polypeptide-associated complex subunit alpha OS=Homo sapiens OX=9606 GN=NACA PE=1 SV=1 - [F8VZJ2_HUMAN]	25.74	5	1	1	2					81.19	25.74	1	2					136	15.0068	4.90674
	Sequence	# PSMs	# Proteins	# Protein Groups	Protein Group Accessions	Modifications	MH+ [Da]	q-Value	PEP	A2	IonScore A2	Exp Value A2	B2	IonScore B2	Exp Value B2	C2	IonScore C2	Exp Value C2	# Missed Cleavages
	VQGEAVSNIQENTQTPTVQEESEEEEVDETGVEVK	2	5	1	F8VZJ2	S22(Phospho)	3940.74	0	0.01413				High	66.14	2.57084e-05				0
D6R904	Tropomyosin alpha-3 chain OS=Homo sapiens OX=9606 GN=TPM3 PE=1 SV=1 - [D6R904_HUMAN]	25.26	31	2	2	2	39.71	10.53	1	1	59.45	14.74	1	1					95	11.0107	4.79248
	Sequence	# PSMs	# Proteins	# Protein Groups	Protein Group Accessions	Modifications	MH+ [Da]	q-Value	PEP	A2	IonScore A2	Exp Value A2	B2	IonScore B2	Exp Value B2	C2	IonScore C2	Exp Value C2	# Missed Cleavages
	IQLVEEELDR	1	30	1	D6R904		1243.65	0	5.33e-14	High	39.71	0.00664952							0
	IQVLQQQADDAEER	1	3	1	D6R904		1642.8	0	0.0113				High	59.45	0.000108904				0
P63104	14-3-3 protein zeta/delta OS=Homo sapiens OX=9606 GN=YWHAZ PE=1 SV=1 - [1433Z_HUMAN]	24.9	5	3	4	4	0	11.84	2	2	66.37	13.06	2	2					245	27.7277	4.79248
	Sequence	# PSMs	# Proteins	# Protein Groups	Protein Group Accessions	Modifications	MH+ [Da]	q-Value	PEP	A2	IonScore A2	Exp Value A2	B2	IonScore B2	Exp Value B2	C2	IonScore C2	Exp Value C2	# Missed Cleavages
	TAFDEAIAELDTLSEESYK	1	5	1	P63104	S14(Phospho)	2211.96	0	3.953e-07	High	22.03	0.564579							0
	SVTEQGAELSNEER	1	2	1	P63104		1548.72	0	0.004079				High	47.07	0.00172383				0
	GIVDQSQQAYQEAFEISK	1	4	1	P63104		2040.99	0	0.01248				High	41.3	0.00671256				0
	DSTLIMQLLR	1	6	2	P63104;P62258		1189.66	0.001	0.001827	High	29.78	0.0514409							0
P06702	Protein S100-A9 OS=Homo sapiens OX=9606 GN=S100A9 PE=1 SV=1 - [S10A9_HUMAN]	24.56	1	2	2	6	0	24.56	2	6									114	13.2335	6.12549
	Sequence	# PSMs	# Proteins	# Protein Groups	Protein Group Accessions	Modifications	MH+ [Da]	q-Value	PEP	A2	IonScore A2	Exp Value A2	B2	IonScore B2	Exp Value B2	C2	IonScore C2	Exp Value C2	# Missed Cleavages
	MHEGDEGPGHHHKPGLGEGTP	4	1	1	P06702	T20(Phospho)	2255.93	0	0.0009097	High	23.19	0.344449							0
	MHEGDEGPGHHHKPGLGEGTP	1	1	1	P06702	M1(Oxidation); T20(Phospho)	2271.92	0	9.758e-09	High	17.28	1.32351							0
	DLQNFLK	1	1	1	P06702		877.478	0.003	0.01384	High	26.12	0.126203							0
A0A2R8Y7R0	Transcription activator BRG1 (Fragment) OS=Homo sapiens OX=9606 GN=SMARCA4 PE=1 SV=1 - [A0A2R8Y7R0_HUMAN]	24.48	20	2	2	3	36.51	16.15	1	2	35.97	8.33	1	1					192	21.4245	4.69092
	Sequence	# PSMs	# Proteins	# Protein Groups	Protein Group Accessions	Modifications	MH+ [Da]	q-Value	PEP	A2	IonScore A2	Exp Value A2	B2	IonScore B2	Exp Value B2	C2	IonScore C2	Exp Value C2	# Missed Cleavages
	KAENAEGQTPAIGPDGEPLDETSQMSDLPVK	1	19	1	A0A2R8Y7R0	S23(Phospho); S26(Phospho)	3384.47	0	6.155e-06	High	36.51	0.0211966							1
	KAENAEGQTPAIGPDGEPLDETSQMSDLPVK	1	19	1	A0A2R8Y7R0	T22(Phospho)	3304.49	0	3.489e-12	High	18.56	1.4461							1
	KIPDPDSDDVSEVDAR	1	20	1	A0A2R8Y7R0	S7(Phospho)	1837.79	0	0.02258				High	35.97	0.0184386				1
B1AK63	Chromatin modification-related protein MEAF6 OS=Homo sapiens OX=9606 GN=MEAF6 PE=1 SV=1 - [B1AK63_HUMAN]	24.26	2	1	1	2	25.77	24.26	1	2									169	19.1525	9.0708
	Sequence	# PSMs	# Proteins	# Protein Groups	Protein Group Accessions	Modifications	MH+ [Da]	q-Value	PEP	A2	IonScore A2	Exp Value A2	B2	IonScore B2	Exp Value B2	C2	IonScore C2	Exp Value C2	# Missed Cleavages
	REPGSGTESDTSPDFHNQENEPSQEDPEDLDGSVQGVKPQK	1	2	1	B1AK63	S12(Phospho)	4546.95	0	8.021e-05	High	25.77	0.214264							1
	REPGSGTESDTSPDFHNQENEPSQEDPEDLDGSVQGVKPQK	1	2	1	B1AK63	T7(Phospho); S9(Phospho); T11(Phospho)	4706.88	0	7.845e-09	High	10.19	5.255							1
A0A494C032	Transcriptional repressor protein YY1 (Fragment) OS=Homo sapiens OX=9606 GN=YY1 PE=1 SV=1 - [A0A494C032_HUMAN]	23.93	4	1	1	2	52.28	23.93	1	2									117	12.9065	4.98291
	Sequence	# PSMs	# Proteins	# Protein Groups	Protein Group Accessions	Modifications	MH+ [Da]	q-Value	PEP	A2	IonScore A2	Exp Value A2	B2	IonScore B2	Exp Value B2	C2	IonScore C2	Exp Value C2	# Missed Cleavages
	DIDHETVVEEQIIGENSPPDYSEYMTGK	2	4	1	A0A494C032	S17(Phospho)	3275.4	0	3.936e-16	High	52.28	0.000533589							0
P10809	60 kDa heat shock protein, mitochondrial OS=Homo sapiens OX=9606 GN=HSPD1 PE=1 SV=2 - [CH60_HUMAN]	23.91	3	10	10	13	118.497	16.75	6	6	103.05	11.52	5	6	20.53	2.27	1	1	573	61.0164	5.87158
	Sequence	# PSMs	# Proteins	# Protein Groups	Protein Group Accessions	Modifications	MH+ [Da]	q-Value	PEP	A2	IonScore A2	Exp Value A2	B2	IonScore B2	Exp Value B2	C2	IonScore C2	Exp Value C2	# Missed Cleavages
	TVIIEQSWGSPK	1	3	1	P10809		1344.72	0	2.115e-05	High	54.77	0.0002374							0
	TLNDELEIIEGMK	2	3	1	P10809		1504.76	0	4.385e-15	High	52.88	0.000406773				High	20.53	0.70588	0
	EIGNIISDAMK	1	3	1	P10809		1190.61	0	3.354e-10	High	39.12	0.00871314							0
	LVQDVANNTNEEAGDGTTTATVLAR	2	3	1	P10809		2560.25	0	0.01761	High	33.37	0.0464859	High	36.21	0.0241007				0
	IMQSSSEVGYDAMAGDFVNMVEK	1	1	1	P10809		2508.11	0	3.936e-16	High	22.66	0.558803							0
	VGGTSDVEVNEK	2	1	1	P10809		1233.6	0	0.01131				High	55.8	0.000187144				0
	VGLQVVAVK	1	1	1	P10809		912.588	0	0.02333				High	44.14	0.000474138				0
	NAGVEGSLIVEK	1	1	1	P10809		1215.66	0	0.03762				High	37.6	0.0115216				0
	GYISPYFINTSK	1	2	1	P10809		1389.71	0.002	0.01384	High	19.03	1.08085							0
	VGEVIVTK	1	1	1	P10809		844.513	0.002	0.1174				High	17.59	0.946672				0
P05787	Keratin, type II cytoskeletal 8 OS=Homo sapiens OX=9606 GN=KRT8 PE=1 SV=7 - [K2C8_HUMAN]	23.81	1	10	11	11	231.508	17.39	7	7	21.17	6.42	4	4					483	53.6711	5.59229
	Sequence	# PSMs	# Proteins	# Protein Groups	Protein Group Accessions	Modifications	MH+ [Da]	q-Value	PEP	A2	IonScore A2	Exp Value A2	B2	IonScore B2	Exp Value B2	C2	IonScore C2	Exp Value C2	# Missed Cleavages
	ASLEAAIADAEQR	1	1	1	P05787		1344.68	0	3.936e-16	High	80.19	7.60012e-07							0
	SLDMDSIIAEVK	1	1	1	P05787		1320.67	0	3.936e-16	High	67.46	1.46719e-05							0
	LEAELGNMQGLVEDFK	1	1	1	P05787		1792.88	0	3.936e-16	High	54.48	0.000316529							0
	LSELEAALQR	1	1	1	P05787		1129.62	0	5.688e-16	High	54.12	0.000248232							0
	LEGLTDEINFLR	1	1	1	P05787		1419.75	0	3.936e-16	High	48.63	0.000954819							0
	YEELQSLAGK	1	1	1	P05787		1137.58	0	9.707e-05	High	25.45	0.215965							0
	TEMENEFVLIK	1	1	1	P05787		1352.68	0.001	0.0009097	High	46.96	0.00180732							0
	ISSSSFSR	1	1	1	P05787	S5(Phospho)	950.397	0.002	0.1016				High	25.3	0.105506				0
	WSLLQQQK	1	1	1	P05787		1030.57	0.002	0.1558				High	17.5	1.14077				0
	TEISEMNR	1	1	1	P05787		979.452	0.004	0.1877				High	21.17	0.354038				0
	FLEQQNK	1	3	2	P05787;P08670		906.468	0.004	0.1886				High	17.09	1.25566				0
P00915	Carbonic anhydrase 1 OS=Homo sapiens OX=9606 GN=CA1 PE=1 SV=2 - [CAH1_HUMAN]	23.75	8	4	4	6	91.357	23.75	4	4					43.99	10.73	2	2	261	28.8524	7.12256
	Sequence	# PSMs	# Proteins	# Protein Groups	Protein Group Accessions	Modifications	MH+ [Da]	q-Value	PEP	A2	IonScore A2	Exp Value A2	B2	IonScore B2	Exp Value B2	C2	IonScore C2	Exp Value C2	# Missed Cleavages
	ADGLAVIGVLMK	2	3	1	P00915		1186.69	0	7.234e-16	High	55.76	0.00010114				High	18.85	0.527783	0
	LYPIANGNNQSPVDIK	2	8	1	P00915		1742.91	0	3.936e-16	High	47.81	0.00127246				High	43.99	0.0031104	0
	VLDALQAIK	1	3	1	P00915		970.593	0.001	0.0009097	High	37	0.00482853							0
	SLLSNVEGDNAVPMQHNNRPTQPLK	1	1	1	P00915		2759.4	0.005	0.01384	High	10.11	8.08754							0
P05109	Protein S100-A8 OS=Homo sapiens OX=9606 GN=S100A8 PE=1 SV=1 - [S10A8_HUMAN]	23.66	1	2	2	2	85.4431	23.66	2	2									93	10.8276	7.03467
	Sequence	# PSMs	# Proteins	# Protein Groups	Protein Group Accessions	Modifications	MH+ [Da]	q-Value	PEP	A2	IonScore A2	Exp Value A2	B2	IonScore B2	Exp Value B2	C2	IonScore C2	Exp Value C2	# Missed Cleavages
	LLETECPQYIR	1	1	1	P05109	C6(Carbamidomethyl)	1421.71	0	3.936e-16	High	84.35	2.98784e-07							0
	ALNSIIDVYHK	1	1	1	P05109		1272.7	0	0.0009097	High	27.15	0.11517							0
A8MX94	GST class-pi OS=Homo sapiens OX=9606 GN=GSTP1 PE=1 SV=1 - [A8MX94_HUMAN]	23.56	2	3	3	3	96.8833	23.56	3	3									174	19.468	5.97314
	Sequence	# PSMs	# Proteins	# Protein Groups	Protein Group Accessions	Modifications	MH+ [Da]	q-Value	PEP	A2	IonScore A2	Exp Value A2	B2	IonScore B2	Exp Value B2	C2	IonScore C2	Exp Value C2	# Missed Cleavages
	PPYTVVYFPVR	1	2	1	A8MX94		1337.73	0	3.936e-16	High	55.34	0.000133488							0
	DQQEAALVDMVNDGVEDLR	1	2	1	A8MX94		2116.98	0	3.936e-16	High	52.93	0.000549313							0
	MLLADQGQSWK	1	2	1	A8MX94		1276.64	0	0.0007914	High	39.28	0.00910027							0
F2Z2T1	Nuclear cap-binding protein subunit 1 OS=Homo sapiens OX=9606 GN=NCBP1 PE=1 SV=1 - [F2Z2T1_HUMAN]	23.17	2	2	2	2	25.62	23.17	2	2									82	9.18166	6.771
	Sequence	# PSMs	# Proteins	# Protein Groups	Protein Group Accessions	Modifications	MH+ [Da]	q-Value	PEP	A2	IonScore A2	Exp Value A2	B2	IonScore B2	Exp Value B2	C2	IonScore C2	Exp Value C2	# Missed Cleavages
	KTSDANETEDHLESLICK	1	2	1	F2Z2T1	T2(Phospho); C17(Carbamidomethyl)	2169.94	0	2.138e-12	High	25.62	0.232485							1
	RKTSDANETEDHLESLICK	1	2	1	F2Z2T1	T3(Phospho); C18(Carbamidomethyl)	2326.04	0.005	0.01384	High	11.1	7.86338							2
O00264	Membrane-associated progesterone receptor component 1 OS=Homo sapiens OX=9606 GN=PGRMC1 PE=1 SV=3 - [PGRC1_HUMAN]	22.56	1	5	5	12	139.217	22.56	5	7					70.69	22.05	2	5	195	21.6578	4.70361
	Sequence	# PSMs	# Proteins	# Protein Groups	Protein Group Accessions	Modifications	MH+ [Da]	q-Value	PEP	A2	IonScore A2	Exp Value A2	B2	IonScore B2	Exp Value B2	C2	IonScore C2	Exp Value C2	# Missed Cleavages
	EGEEPTVYSDEEEPKDESAR	5	1	1	O00264	S9(Phospho)	2375.94	0	2.895e-12	High	54.05	0.000220585				High	44.55	0.00183443	1
	GDQPAASGDSDDDEPPPLPR	1	1	1	O00264	S10(Phospho)	2115.85	0	3.936e-16	High	52.48	0.000327099							0
	IVRGDQPAASGDSDDDEPPPLPR	4	1	1	O00264	S13(Phospho)	2484.11	0	3.936e-16	High	33.48	0.0460862				High	24.81	0.327231	1
	EGEEPTVYSDEEEPKDESARK	1	1	1	O00264	S9(Phospho)	2504.04	0	3.936e-16	High	31.03	0.0595195							2
	EGEEPTVYSDEEEPK	1	1	1	O00264	S9(Phospho)	1817.7	0	0.0003196	High	25.55	0.123007							0
A0A1W2PQ43	Bcl-2-associated transcription factor 1 OS=Homo sapiens OX=9606 GN=BCLAF1 PE=1 SV=1 - [A0A1W2PQ43_HUMAN]	22.33	6	12	12	32	222.851	16.79	8	13	20.67	7.82	5	6	176.057	15.5	9	13	703	80.5704	10.0962
	Sequence	# PSMs	# Proteins	# Protein Groups	Protein Group Accessions	Modifications	MH+ [Da]	q-Value	PEP	A2	IonScore A2	Exp Value A2	B2	IonScore B2	Exp Value B2	C2	IonScore C2	Exp Value C2	# Missed Cleavages
	GRAEGEWEDQEALDYFSDK	6	6	1	A0A1W2PQ43	S17(Phospho)	2324.94	0	3.936e-16	High	84.41	2.33284e-07	High	10.75	5.427	High	32.74	0.0308623	1
	FNDSEGDDTEETEDYR	2	6	1	A0A1W2PQ43	S4(Phospho)	2001.69	0	3.936e-16	High	75.66	5.22915e-07				High	50.31	0.000162013	0
	AEGEWEDQEALDYFSDK	4	6	1	A0A1W2PQ43	S15(Phospho)	2111.82	0	1.073e-07	High	46.05	0.00118073				High	40.16	0.00439024	0
	KAEGEPQEESPLK	4	6	1	A0A1W2PQ43	S10(Phospho)	1521.68	0	1.156e-10	High	36.15	0.0166708	High	17.12	1.33533	High	55.63	0.000177792	1
	DLFDYSPPLHK	4	6	1	A0A1W2PQ43	S6(Phospho)	1411.63	0	0.0009097	High	29.23	0.0804748				High	29.67	0.0684592	0
	SKSQEEPKDTFEHDPSESIDEFNK	2	6	1	A0A1W2PQ43	T10(Phospho)	2903.23	0	7.375e-05	High	20.28	0.86537							2
	YSPSQNSPIHHIPSR	3	6	1	A0A1W2PQ43	S2(Phospho); S7(Phospho)	1879.78	0	0.0009328	High	15.52	1.93575				High	21.58	0.428482	0
	SSATSGDIWPGLSAYDNSPR	1	6	1	A0A1W2PQ43	S18(Phospho)	2160.93	0.001	0.0009097	High	26.22	0.208456							0
	STFREESPLR	2	6	1	A0A1W2PQ43	S7(Phospho)	1301.58	0.001	0.001985				High	14.91	2.24219	High	39.66	0.00673733	1
	NTPSQHSHSIQHSPER	1	6	1	A0A1W2PQ43	T2(Phospho); S13(Phospho)	2001.79	0.001	0.001335							High	26.15	0.120967	0
	IDISPSTLR	2	6	1	A0A1W2PQ43	S4(Phospho)	1081.53	0.002	0.08224				High	24.24	0.293452	High	19.95	0.811287	0
	GRAEGEWEDQEALDYFSDKESGK	1	6	1	A0A1W2PQ43	S17(Phospho); S21(Phospho)	2806.09	0.002	0.09652				High	20.67	0.45723				2
E9PCT3	Caveolin OS=Homo sapiens OX=9606 GN=CAV2 PE=1 SV=1 - [E9PCT3_HUMAN]	22.12	2	1	1	1	21.11	22.12	1	1									113	12.9444	5.05908
	Sequence	# PSMs	# Proteins	# Protein Groups	Protein Group Accessions	Modifications	MH+ [Da]	q-Value	PEP	A2	IonScore A2	Exp Value A2	B2	IonScore B2	Exp Value B2	C2	IonScore C2	Exp Value C2	# Missed Cleavages
	ADVQLFMDDDSYSHHSGLEYADPEK	1	2	1	E9PCT3	S11(Phospho); S16(Phospho)	3029.16	0.001	0.001827	High	21.11	0.392265							0
H0YAC7	Coatomer subunit beta' (Fragment) OS=Homo sapiens OX=9606 GN=COPB2 PE=1 SV=1 - [H0YAC7_HUMAN]	22.03	2	1	1	1	22.46	22.03	1	1									118	13.3115	4.89404
	Sequence	# PSMs	# Proteins	# Protein Groups	Protein Group Accessions	Modifications	MH+ [Da]	q-Value	PEP	A2	IonScore A2	Exp Value A2	B2	IonScore B2	Exp Value B2	C2	IonScore C2	Exp Value C2	# Missed Cleavages
	STAQQELDGKPASPTPVIVASHTANK	1	2	1	H0YAC7	T15(Phospho)	2727.34	0	8.37e-05	High	22.46	0.557329							0
F5H3B1	Bcl2-associated agonist of cell death (Fragment) OS=Homo sapiens OX=9606 GN=BAD PE=1 SV=1 - [F5H3B1_HUMAN]	21.57	3	1	1	1	29.78	21.57	1	1									51	5.80394	10.8286
	Sequence	# PSMs	# Proteins	# Protein Groups	Protein Group Accessions	Modifications	MH+ [Da]	q-Value	PEP	A2	IonScore A2	Exp Value A2	B2	IonScore B2	Exp Value B2	C2	IonScore C2	Exp Value C2	# Missed Cleavages
	RMSDEFVDSFK	1	3	1	F5H3B1	S3(Phospho)	1440.59	0.001	0.001827	High	29.78	0.0481799							1
H0YCM0	Serine/threonine-protein kinase PAK 1 (Fragment) OS=Homo sapiens OX=9606 GN=PAK1 PE=1 SV=1 - [H0YCM0_HUMAN]	21.56	4	1	1	2	35.93	21.56	1	2									167	18.6201	4.80518
	Sequence	# PSMs	# Proteins	# Protein Groups	Protein Group Accessions	Modifications	MH+ [Da]	q-Value	PEP	A2	IonScore A2	Exp Value A2	B2	IonScore B2	Exp Value B2	C2	IonScore C2	Exp Value C2	# Missed Cleavages
	AVSETPAVPPVSEDEDDDDDDATPPPVIAPRPEHTK	2	4	1	H0YCM0	S12(Phospho)	3888.74	0.001	0.001827	High	35.93	0.0271863							0
P02671	Fibrinogen alpha chain OS=Homo sapiens OX=9606 GN=FGA PE=1 SV=2 - [FIBA_HUMAN]	21.48	1	12	12	21	209.12	14.9	8	12	17.62	4.73	3	4	110.93	9.58	5	5	866	94.9144	6.01123
	Sequence	# PSMs	# Proteins	# Protein Groups	Protein Group Accessions	Modifications	MH+ [Da]	q-Value	PEP	A2	IonScore A2	Exp Value A2	B2	IonScore B2	Exp Value B2	C2	IonScore C2	Exp Value C2	# Missed Cleavages
	NPSSAGSWNSGSSGPGSTGNR	2	1	1	P02671		1963.85	0	3.936e-16	High	79.05	1.07588e-06				High	49.4	0.000931153	0
	GLIDEVNQDFTNR	3	1	1	P02671		1520.74	0	3.936e-16	High	76.96	1.77308e-06				High	50.98	0.000713008	0
	NPSSAGSWNSGSSGPGSTGNR	1	1	1	P02671	S4(Phospho)	2043.82	0	3.936e-16	High	52.5	0.000315473							0
	ESSSHHPGIAEFPSR	1	1	1	P02671		1637.77	0	3.936e-16	High	50.13	0.000945277							0
	DSHSLTTNIMEILR	3	1	1	P02671		1629.83	0	4.632e-12	High	25.82	0.210633							0
	EVVTSEDGSDCPEAMDLGTLSGIGTLDGFR	1	1	1	P02671	C11(Carbamidomethyl)	3128.41	0	0.0001054	High	18.29	1.62113							0
	DSDWPFCSDEDWNYK	3	1	1	P02671	C7(Carbamidomethyl)	1963.75	0	0.03437				High	17.86	0.618717	High	18.74	0.452438	0
	GGSTSYGTGSETESPR	1	1	1	P02671		1572.67	0	4.653e-09							High	50.31	0.000553078	0
	MELERPGGNEITR	1	1	1	P02671		1501.74	0.001	0.001827	High	23.18	0.404386							0
	HPDEAAFFDTASTGK	1	1	1	P02671	T13(Phospho)	1673.69	0.001	0.0009097	High	14.41	2.23504							0
	MADEAGSEADHEGTHSTK	1	1	1	P02671	S7(Phospho)	1952.72	0.001	0.01716							High	19.77	0.394341	0
	NSLFEYQK	1	1	1	P02671		1028.5	0.002	0.01384	High	35.34	0.0158489							0
	QLEQVIAK	1	1	1	P02671		928.547	0.002	0.05397				High	29.78	0.0511253				0
	MADEAGSEADHEGTHSTK	1	1	1	P02671	M1(Oxidation); S7(Phospho)	1968.73	0.002	0.07987				High	17.62	0.7049				0
C9J722	Anion exchange protein 2 (Fragment) OS=Homo sapiens OX=9606 GN=SLC4A2 PE=1 SV=1 - [C9J722_HUMAN]	21.38	4	1	1	1					37.35	21.38	1	1					145	15.9296	5.07178
	Sequence	# PSMs	# Proteins	# Protein Groups	Protein Group Accessions	Modifications	MH+ [Da]	q-Value	PEP	A2	IonScore A2	Exp Value A2	B2	IonScore B2	Exp Value B2	C2	IonScore C2	Exp Value C2	# Missed Cleavages
	RRPGASPTGETPTIEEGEEDEDEASEAEGAR	1	4	1	C9J722	T13(Phospho)	3352.41	0.002	0.06577				High	37.35	0.0153889				1
C9J0D1	Histone H2A OS=Homo sapiens OX=9606 GN=H2AZ2 PE=1 SV=1 - [C9J0D1_HUMAN]	21.31	7	1	3	5	52.87	21.31	3	3					42.104	13.11	2	2	122	13.155	9.99365
	Sequence	# PSMs	# Proteins	# Protein Groups	Protein Group Accessions	Modifications	MH+ [Da]	q-Value	PEP	A2	IonScore A2	Exp Value A2	B2	IonScore B2	Exp Value B2	C2	IonScore C2	Exp Value C2	# Missed Cleavages
	AGLQFPVGR	2	19	2	Q96KK5;C9J0D1		944.532	0.001	0.001827	High	43.26	0.00329028				High	41.63	0.0048507	0
	GDEELDSLIK	1	4	1	C9J0D1		1118.56	0.001	0.001827	High	35.11	0.024018							0
	HLQLAIR	2	19	2	Q96KK5;C9J0D1		850.52	0.001	0.009045	High	17.12	0.214468				High	28.56	0.0229174	0
D6RBM8	SRSF protein kinase 1 (Fragment) OS=Homo sapiens OX=9606 GN=SRPK1 PE=1 SV=1 - [D6RBM8_HUMAN]	21.29	3	1	1	1					55.98	21.29	1	1					155	17.4436	5.22412
	Sequence	# PSMs	# Proteins	# Protein Groups	Protein Group Accessions	Modifications	MH+ [Da]	q-Value	PEP	A2	IonScore A2	Exp Value A2	B2	IonScore B2	Exp Value B2	C2	IonScore C2	Exp Value C2	# Missed Cleavages
	GSAPHSESDLPEQEEEILGSDDDEQEDPNDYCK	1	3	1	D6RBM8	S20(Phospho); C32(Carbamidomethyl)	3814.47	0	0.001656				High	55.98	0.000126931				0
B8ZZ54	10 kDa heat shock protein, mitochondrial OS=Homo sapiens OX=9606 GN=HSPE1 PE=1 SV=1 - [B8ZZ54_HUMAN]	21.28	3	1	1	1					32.59	21.28	1	1					47	5.18669	4.71631
	Sequence	# PSMs	# Proteins	# Protein Groups	Protein Group Accessions	Modifications	MH+ [Da]	q-Value	PEP	A2	IonScore A2	Exp Value A2	B2	IonScore B2	Exp Value B2	C2	IonScore C2	Exp Value C2	# Missed Cleavages
	GGEIQPVSVK	1	3	1	B8ZZ54		1013.56	0.005	0.1989				High	32.59	0.0179839				0
P04921	Glycophorin-C OS=Homo sapiens OX=9606 GN=GYPC PE=1 SV=1 - [GLPC_HUMAN]	21.09	1	1	1	1					38.93	21.09	1	1					128	13.8017	4.84326
	Sequence	# PSMs	# Proteins	# Protein Groups	Protein Group Accessions	Modifications	MH+ [Da]	q-Value	PEP	A2	IonScore A2	Exp Value A2	B2	IonScore B2	Exp Value B2	C2	IonScore C2	Exp Value C2	# Missed Cleavages
	GTEFAESADAALQGDPALQDAGDSSRK	1	1	1	P04921	S25(Phospho)	2787.21	0	0.03497				High	38.93	0.0123588				1
E9PL71	Elongation factor 1-delta (Fragment) OS=Homo sapiens OX=9606 GN=EEF1D PE=1 SV=1 - [E9PL71_HUMAN]	20.86	9	2	2	24	76.06	13.9	1	8	39.4933	20.86	2	11	41.6567	20.86	2	5	187	20.8063	5.0083
	Sequence	# PSMs	# Proteins	# Protein Groups	Protein Group Accessions	Modifications	MH+ [Da]	q-Value	PEP	A2	IonScore A2	Exp Value A2	B2	IonScore B2	Exp Value B2	C2	IonScore C2	Exp Value C2	# Missed Cleavages
	KPATPAEDDEDDDIDLFGSDNEEEDK	20	9	1	E9PL71	S19(Phospho)	2989.17	0	3.936e-16	High	55.62	0.000148319	High	24.36	0.194578	High	30.33	0.045461	0
	KPATPAEDDEDDDIDLFGSDNEEEDK	2	9	1	E9PL71	T4(Phospho); S19(Phospho)	3069.13	0	1.08e-14	High	35.03	0.0109133				High	17.84	0.491667	0
	ATAPQTQHVSPMR	2	8	1	E9PL71	S10(Phospho); M12(Oxidation)	1519.67	0.002	0.07921				High	21.16	0.543956	High	14.22	2.74371	0
P29966	Myristoylated alanine-rich C-kinase substrate OS=Homo sapiens OX=9606 GN=MARCKS PE=1 SV=4 - [MARCS_HUMAN]	20.78	1	3	3	6	51.89	20.78	3	4					73.44	5.72	1	2	332	31.5359	4.44971
	Sequence	# PSMs	# Proteins	# Protein Groups	Protein Group Accessions	Modifications	MH+ [Da]	q-Value	PEP	A2	IonScore A2	Exp Value A2	B2	IonScore B2	Exp Value B2	C2	IonScore C2	Exp Value C2	# Missed Cleavages
	GEAAAERPGEAAVASSPSK	4	1	1	P29966	S18(Phospho)	1864.83	0	7.841e-14	High	30.82	0.0824216				High	50.07	0.000956459	0
	GEPAAAAAPEAGASPVEK	1	1	1	P29966	S14(Phospho)	1702.77	0	0.0005808	High	23.96	0.363219							0
	EAPAEGEAAEPGSPTAAEGEAASAASSTSSPK	1	1	1	P29966	T15(Phospho)	2995.27	0.001	0.0009097	High	22.14	0.602083							0
H0YBP8	Chromatin accessibility complex protein 1 (Fragment) OS=Homo sapiens OX=9606 GN=CHRAC1 PE=1 SV=1 - [H0YBP8_HUMAN]	20.62	2	1	1	4					70.0035	20.62	1	4					97	10.9733	4.84326
	Sequence	# PSMs	# Proteins	# Protein Groups	Protein Group Accessions	Modifications	MH+ [Da]	q-Value	PEP	A2	IonScore A2	Exp Value A2	B2	IonScore B2	Exp Value B2	C2	IonScore C2	Exp Value C2	# Missed Cleavages
	REEDEENDNDNESDHDEADS	4	2	1	H0YBP8	S13(Phospho)	2443.79	0	0.01311				High	50.72	0.000105903				1
A0A0A0MSI0	Peroxiredoxin-1 (Fragment) OS=Homo sapiens OX=9606 GN=PRDX1 PE=1 SV=1 - [A0A0A0MSI0_HUMAN]	20.47	6	3	3	4	71.92	15.79	2	2	37.85	4.68	1	1	28.37	6.43	1	1	171	18.9637	6.91748
	Sequence	# PSMs	# Proteins	# Protein Groups	Protein Group Accessions	Modifications	MH+ [Da]	q-Value	PEP	A2	IonScore A2	Exp Value A2	B2	IonScore B2	Exp Value B2	C2	IonScore C2	Exp Value C2	# Missed Cleavages
	QITVNDLPVGR	2	4	1	A0A0A0MSI0		1211.67	0	8.203e-09	High	46.47	0.000941145				High	28.37	0.0648407	0
	QGGLGPMNIPLVSDPK	1	2	1	A0A0A0MSI0		1622.86	0	3.936e-16	High	45.45	0.00198003							0
	GLFIIDDK	1	5	1	A0A0A0MSI0		920.508	0.002	0.06642				High	37.85	0.00776819				0
G5E9F5	MpV17 transgene, murine homolog, glomerulosclerosis, isoform CRA_d OS=Homo sapiens OX=9606 GN=MPV17 PE=1 SV=1 - [G5E9F5_HUMAN]	20.35	4	1	1	2	21.31	20.35	1	2									113	12.9498	9.51025
	Sequence	# PSMs	# Proteins	# Protein Groups	Protein Group Accessions	Modifications	MH+ [Da]	q-Value	PEP	A2	IonScore A2	Exp Value A2	B2	IonScore B2	Exp Value B2	C2	IonScore C2	Exp Value C2	# Missed Cleavages
	VQVLTAGSLMGLGDIISQQLVER	2	4	1	G5E9F5	M10(Oxidation)	2443.32	0.001	0.001827	High	21.31	0.279571							0
J3KS94	Myelin basic protein (Fragment) OS=Homo sapiens OX=9606 GN=MBP PE=1 SV=1 - [J3KS94_HUMAN]	20.13	3	1	1	1					30.24	20.13	1	1					159	17.4323	5.61768
	Sequence	# PSMs	# Proteins	# Protein Groups	Protein Group Accessions	Modifications	MH+ [Da]	q-Value	PEP	A2	IonScore A2	Exp Value A2	B2	IonScore B2	Exp Value B2	C2	IonScore C2	Exp Value C2	# Missed Cleavages
	TTSEDNEVFGEADANQNNGTSSQDTAVTDSKR	1	3	1	J3KS94	T1(Phospho)	3468.44	0.002	0.06737				High	30.24	0.0802409				1
M0QX76	40S ribosomal protein S16 (Fragment) OS=Homo sapiens OX=9606 GN=RPS16 PE=1 SV=1 - [M0QX76_HUMAN]	20	6	1	1	1	24.15	20	1	1									50	5.55411	9.62744
	Sequence	# PSMs	# Proteins	# Protein Groups	Protein Group Accessions	Modifications	MH+ [Da]	q-Value	PEP	A2	IonScore A2	Exp Value A2	B2	IonScore B2	Exp Value B2	C2	IonScore C2	Exp Value C2	# Missed Cleavages
	LLEPVLLLGK	1	6	1	M0QX76		1094.72	0.006	0.0805	High	24.15	0.0092302							0
A9IYQ1	Sister chromatid cohesion protein PDS5 homolog B (Fragment) OS=Homo sapiens OX=9606 GN=PDS5B PE=1 SV=1 - [A9IYQ1_HUMAN]	19.87	2	5	5	6	42.19	19.87	5	6									302	33.6719	9.26123
	Sequence	# PSMs	# Proteins	# Protein Groups	Protein Group Accessions	Modifications	MH+ [Da]	q-Value	PEP	A2	IonScore A2	Exp Value A2	B2	IonScore B2	Exp Value B2	C2	IonScore C2	Exp Value C2	# Missed Cleavages
	GHTASESDEQQWPEEK	1	2	1	A9IYQ1	S5(Phospho)	1937.76	0	0.0001426	High	32.33	0.0297073							0
	GRLDSSEMDHSENEDYTMSSPLPGK	1	2	1	A9IYQ1	S5(Phospho); S11(Phospho)	2942.13	0	5.332e-15	High	20.73	0.447998							1
	LKEDILENEDEQNSPPKK	1	2	1	A9IYQ1	S14(Phospho)	2206.03	0	4.443e-09	High	17.49	1.851							2
	RGHTASESDEQQWPEEK	1	2	1	A9IYQ1	S6(Phospho)	2093.86	0.001	0.0009097	High	25.64	0.16906							1
	GRLDSSEMDHSENEDYTMSSPLPGK	1	2	1	A9IYQ1	S11(Phospho)	2862.17	0.001	0.001827	High	13.79	3.09403							1
	EDILENEDEQNSPPKK	1	2	1	A9IYQ1	S12(Phospho)	1964.85	0.008	0.08509	High	12.37	4.98888							1
P60468	Protein transport protein Sec61 subunit beta OS=Homo sapiens OX=9606 GN=SEC61B PE=1 SV=2 - [SC61B_HUMAN]	19.79	1	1	1	2					58.99	19.79	1	2					96	9.9681	11.561
	Sequence	# PSMs	# Proteins	# Protein Groups	Protein Group Accessions	Modifications	MH+ [Da]	q-Value	PEP	A2	IonScore A2	Exp Value A2	B2	IonScore B2	Exp Value B2	C2	IonScore C2	Exp Value C2	# Missed Cleavages
	PGPTPSGTNVGSSGRSPSK	2	1	1	P60468	S16(Phospho)	1849.85	0.002	0.06015				High	48.49	0.00134642				1
H7C1L2	Splicing factor 3A subunit 1 (Fragment) OS=Homo sapiens OX=9606 GN=SF3A1 PE=1 SV=1 - [H7C1L2_HUMAN]	19.69	2	3	3	7	52.716	8.49	2	3	19.93	19.69	3	3	28.91	8.49	1	1	259	28.6162	4.64014
	Sequence	# PSMs	# Proteins	# Protein Groups	Protein Group Accessions	Modifications	MH+ [Da]	q-Value	PEP	A2	IonScore A2	Exp Value A2	B2	IonScore B2	Exp Value B2	C2	IonScore C2	Exp Value C2	# Missed Cleavages
	FGESEEVEMEVESDEEDDKQEK	3	2	1	H7C1L2	S13(Phospho)	2697.03	0	3.936e-16	High	60.39	4.3329e-05	High	19.93	0.467983	High	28.91	0.0537892	1
	FGESEEVEMEVESDEEDDK	1	2	1	H7C1L2	S13(Phospho)	2311.84	0	1.654e-05	High	18.46	0.365668							0
	FGESEEVEMEVESDEEDDK	1	2	1	H7C1L2	M9(Oxidation); S13(Phospho)	2327.83	0	0.04185				High	23.77	0.102841				0
	FGESEEVEMEVESDEEDDKQEK	1	2	1	H7C1L2	M9(Oxidation); S13(Phospho)	2713.03	0.001	0.001434	High	14.21	1.65002							1
	AEEPPSQLDQDTQVQDMDEGSDDEEEGQK	1	2	1	H7C1L2	S21(Phospho)	3329.29	0.003	0.1655				High	11.85	3.16115				0
P55081	Microfibrillar-associated protein 1 OS=Homo sapiens OX=9606 GN=MFAP1 PE=1 SV=2 - [MFAP1_HUMAN]	19.59	1	5	5	25	196.86	19.59	5	13	29.72	4.78	1	2	97.5033	19.36	4	10	439	51.9266	4.98291
	Sequence	# PSMs	# Proteins	# Protein Groups	Protein Group Accessions	Modifications	MH+ [Da]	q-Value	PEP	A2	IonScore A2	Exp Value A2	B2	IonScore B2	Exp Value B2	C2	IonScore C2	Exp Value C2	# Missed Cleavages
	MEREDSSEEEEEEIDDEEIER	4	1	1	P55081	S6(Phospho); S7(Phospho)	2786.98	0	3.936e-16	High	62.29	1.47845e-05				High	41.5	0.00145837	1
	IVEPEVVGESDSEVEGDAWR	4	1	1	P55081	S10(Phospho)	2281.99	0	3.936e-16	High	62.1	5.70967e-05				High	34.74	0.0292092	0
	MEREDSSEEEEEEIDDEEIERR	1	1	1	P55081	S6(Phospho); S7(Phospho)	2943.08	0	8.757e-09	High	37.04	0.00712698							2
	SLAALDALNTDDENDEEEYEAWK	4	1	1	P55081	T10(Phospho)	2721.12	0	3.864e-08	High	29.5	0.0799999				High	25.14	0.193975	0
	RPDYAPMESSDEEDEEFQFIK	4	1	1	P55081	S9(Phospho); S10(Phospho)	2722.02	0	1.612e-09	High	24.78	0.16317				High	32.27	0.0248732	0
	RPDYAPMESSDEEDEEFQFIK	2	1	1	P55081	M7(Oxidation); S9(Phospho); S10(Phospho)	2738.03	0	3.936e-16	High	23.28	0.22226				High	11.68	2.51645	0
	IVEPEVVGESDSEVEGDAWR	3	1	1	P55081	S10(Phospho); S12(Phospho)	2361.94	0	0.001335	High	22.49	0.38891				High	22.76	0.322565	0
	MEREDSSEEEEEEIDDEEIER	2	1	1	P55081	M1(Oxidation); S6(Phospho); S7(Phospho)	2802.97	0	0.01164				High	29.72	0.0237318				1
	RPDYAPMESSDEEDEEFQFIK	1	1	1	P55081	S10(Phospho)	2642.07	0.001	0.001001	High	15.97	1.85145							0
D6RD83	Heterogeneous nuclear ribonucleoprotein D0 (Fragment) OS=Homo sapiens OX=9606 GN=HNRNPD PE=1 SV=1 - [D6RD83_HUMAN]	19.57	3	1	1	2					36.43	19.57	1	2					92	9.93472	5.05908
	Sequence	# PSMs	# Proteins	# Protein Groups	Protein Group Accessions	Modifications	MH+ [Da]	q-Value	PEP	A2	IonScore A2	Exp Value A2	B2	IonScore B2	Exp Value B2	C2	IonScore C2	Exp Value C2	# Missed Cleavages
	IDASKNEEDEGHSNSSPR	2	3	1	D6RD83	S15(Phospho)	2051.83	0	0.03578				High	35.37	0.0168288				1
P10909	Clusterin OS=Homo sapiens OX=9606 GN=CLU PE=1 SV=1 - [CLUS_HUMAN]	19.38	2	6	6	6	83.84	13.81	4	4	48.67	5.57	2	2					449	52.461	6.26514
	Sequence	# PSMs	# Proteins	# Protein Groups	Protein Group Accessions	Modifications	MH+ [Da]	q-Value	PEP	A2	IonScore A2	Exp Value A2	B2	IonScore B2	Exp Value B2	C2	IonScore C2	Exp Value C2	# Missed Cleavages
	LFDSDPITVTVPVEVSR	1	1	1	P10909		1873.99	0	3.936e-16	High	46.52	0.00149305							0
	ASSIIDELFQDR	1	2	1	P10909		1393.7	0	5.467e-11	High	44.25	0.00297475							0
	TLLSNLEEAK	1	1	1	P10909		1117.61	0	0.0001218	High	39.61	0.00689193							0
	VTTVASHTSDSDVPSGVTEVVVK	1	2	1	P10909		2314.18	0	0.0006877	High	25.46	0.233672							0
	EILSVDCSTNNPSQAK	1	2	1	P10909	C7(Carbamidomethyl)	1762.83	0	0.0461				High	35.18	0.0276691				0
	IDSLLENDR	1	2	1	P10909		1074.54	0.002	0.06558				High	36.99	0.013799				0
P63267	Actin, gamma-enteric smooth muscle OS=Homo sapiens OX=9606 GN=ACTG2 PE=1 SV=1 - [ACTH_HUMAN]	19.15	5	1	6	14	67.18	13.56	4	6		0			57.52	19.15	6	6	376	41.8498	5.47803
	Sequence	# PSMs	# Proteins	# Protein Groups	Protein Group Accessions	Modifications	MH+ [Da]	q-Value	PEP	A2	IonScore A2	Exp Value A2	B2	IonScore B2	Exp Value B2	C2	IonScore C2	Exp Value C2	# Missed Cleavages
	MTQIMFETFNTPAMYVAIQAVLSLYASGR	3	7	2	P63267;P60709	S23(Phosphorylation)	3588.89	0	1.881e-14	High	48.34	0.00137395				High	21.47	0.686477	0
	AGFAGDDAPR	2	8	2	P60709;P63267		976.449	0	0.01223				High	56.5	0.000116637	High	50.77	0.000427977	0
	DSYVGDEAQSK	2	8	2	P60709;P63267		1198.52	0	0.02212				High	48.01	0.000898149	High	18.92	0.646936	0
	EITALAPSTMK	2	7	2	P63267;P60709		1161.62	0.001	0.001827	High	30.5	0.0654178				High	25.83	0.18899	0
	YPIEHGIITNWDDMEK	3	5	1	P63267		1960.91	0.001	0.001827	High	17.55	1.79748				High	12.87	5.21839	0
	DLTDYLMK	2	7	2	P63267;P60709		998.487	0.005	0.01384	High	21.95	0.372427				High	18.59	0.860578	0
H0YE82	N-acetyl-D-glucosamine kinase (Fragment) OS=Homo sapiens OX=9606 GN=NAGK PE=1 SV=2 - [H0YE82_HUMAN]	19.05	6	1	1	1					0	19.05	1	1					84	8.82562	5.36377
	Sequence	# PSMs	# Proteins	# Protein Groups	Protein Group Accessions	Modifications	MH+ [Da]	q-Value	PEP	A2	IonScore A2	Exp Value A2	B2	IonScore B2	Exp Value B2	C2	IonScore C2	Exp Value C2	# Missed Cleavages
	SLGLSLSGGDQEDAGR	1	6	1	H0YE82	S7(Phospho)	1641.72	0	0.02773				High	31.29	0.0558379				0
P62258	14-3-3 protein epsilon OS=Homo sapiens OX=9606 GN=YWHAE PE=1 SV=1 - [1433E_HUMAN]	18.82	1	2	3	3	63.4899	18.82	3	3									255	29.1554	4.7417
	Sequence	# PSMs	# Proteins	# Protein Groups	Protein Group Accessions	Modifications	MH+ [Da]	q-Value	PEP	A2	IonScore A2	Exp Value A2	B2	IonScore B2	Exp Value B2	C2	IonScore C2	Exp Value C2	# Missed Cleavages
	DNLTLWTSDMQGDGEEQNK	1	1	1	P62258		2180.94	0	3.936e-16	High	56.62	0.00018663							0
	AAFDDAIAELDTLSEESYK	1	1	1	P62258	S14(Phospho)	2167.94	0	9.61e-07	High	31.04	0.0638294							0
	DSTLIMQLLR	1	6	2	P63104;P62258		1189.66	0.001	0.001827	High	29.78	0.0514409							0
E9PS34	Nucleosome assembly protein 1-like 4 (Fragment) OS=Homo sapiens OX=9606 GN=NAP1L4 PE=1 SV=1 - [E9PS34_HUMAN]	18.8	7	1	1	3	46.59	18.8	1	2					22.22	18.8	1	1	133	15.2726	5.12256
	Sequence	# PSMs	# Proteins	# Protein Groups	Protein Group Accessions	Modifications	MH+ [Da]	q-Value	PEP	A2	IonScore A2	Exp Value A2	B2	IonScore B2	Exp Value B2	C2	IonScore C2	Exp Value C2	# Missed Cleavages
	EFITGDVEPTDAESEWHSENEEEEK	3	7	1	E9PS34	S18(Phospho)	3016.19	0	3.936e-16	High	43.48	0.00285402				High	22.22	0.353877	0
F8W1K8	60S acidic ribosomal protein P0 OS=Homo sapiens OX=9606 GN=RPLP0 PE=1 SV=1 - [F8W1K8_HUMAN]	18.69	4	1	1	4	0	18.69	1	4						0			107	11.0506	4.75439
	Sequence	# PSMs	# Proteins	# Protein Groups	Protein Group Accessions	Modifications	MH+ [Da]	q-Value	PEP	A2	IonScore A2	Exp Value A2	B2	IonScore B2	Exp Value B2	C2	IonScore C2	Exp Value C2	# Missed Cleavages
	VEAKEESEESDEDMGFGLFD	2	4	1	F8W1K8	S7(Phospho); S10(Phospho)	2422.86	0	9.931e-11	High	23.66	0.113444							1
	VEAKEESEESDEDMGFGLFD	2	4	1	F8W1K8	S10(Phospho)	2342.89	0.001	0.001025	High	12.57	2.66715							1
A0A5H1ZRQ3	Immunoglobulin kappa constant (Fragment) OS=Homo sapiens OX=9606 GN=IGKC PE=1 SV=1 - [A0A5H1ZRQ3_HUMAN]	18.69	2	1	1	2	76.35	18.69	1	2									107	11.7117	5.87158
	Sequence	# PSMs	# Proteins	# Protein Groups	Protein Group Accessions	Modifications	MH+ [Da]	q-Value	PEP	A2	IonScore A2	Exp Value A2	B2	IonScore B2	Exp Value B2	C2	IonScore C2	Exp Value C2	# Missed Cleavages
	VDNALQSGNSQESVTEQDSK	2	2	1	A0A5H1ZRQ3		2135.97	0	3.936e-16	High	66.23	2.48595e-05							0
Q5STZ8	ATP-binding cassette sub-family F member 1 (Fragment) OS=Homo sapiens OX=9606 GN=ABCF1 PE=1 SV=9 - [Q5STZ8_HUMAN]	18.58	3	4	4	12	155.998	18.58	4	10					22.63	6.19	1	2	339	38.2956	5.87158
	Sequence	# PSMs	# Proteins	# Protein Groups	Protein Group Accessions	Modifications	MH+ [Da]	q-Value	PEP	A2	IonScore A2	Exp Value A2	B2	IonScore B2	Exp Value B2	C2	IonScore C2	Exp Value C2	# Missed Cleavages
	KAEQGSEEEGEGEEEEEEGGESK	4	2	1	Q5STZ8	S6(Phospho)	2561.96	0	2.232e-13	High	49.12	0.000491683							1
	GGNVFAALIQDQSEEEEEEEK	4	3	1	Q5STZ8	S13(Phospho)	2431.02	0	3.936e-16	High	43.56	0.00345395				High	23.65	0.323208	0
	LSVPTSDEEDEVPAPKPR	2	3	1	Q5STZ8	S6(Phospho)	2045.95	0	0.0009097	High	36.36	0.0229704							0
	KLSVPTSDEEDEVPAPKPR	1	3	1	Q5STZ8	S7(Phospho)	2174.04	0	0.0001437	High	21.81	0.723443							1
	KLSVPTSDEEDEVPAPKPR	1	3	1	Q5STZ8	S3(Phospho); T6(Phospho)	2254.01	0.001	0.001827	High	15.77	2.89878							1
G3V583	Protein FAM177A1 (Fragment) OS=Homo sapiens OX=9606 GN=FAM177A1 PE=1 SV=1 - [G3V583_HUMAN]	18.57	2	2	2	2	39.34	18.57	2	2									140	16.312	4.70361
	Sequence	# PSMs	# Proteins	# Protein Groups	Protein Group Accessions	Modifications	MH+ [Da]	q-Value	PEP	A2	IonScore A2	Exp Value A2	B2	IonScore B2	Exp Value B2	C2	IonScore C2	Exp Value C2	# Missed Cleavages
	VIHFVSGETMEEYSTDEDEVDGLEK	1	2	1	G3V583	S14(Phospho); T15(Phospho)	3018.2	0	3.936e-16	High	42.43	0.00334886							0
	RVIHFVSGETMEEYSTDEDEVDGLEK	1	2	1	G3V583	S15(Phospho); T16(Phospho)	3174.29	0.001	0.001827	High	14.91	2.57957							1
C9J7Y7	DNA mismatch repair protein Msh6 (Fragment) OS=Homo sapiens OX=9606 GN=MSH6 PE=1 SV=1 - [C9J7Y7_HUMAN]	18.54	7	2	2	2					29.03	18.54	2	2					151	17.5848	6.3667
	Sequence	# PSMs	# Proteins	# Protein Groups	Protein Group Accessions	Modifications	MH+ [Da]	q-Value	PEP	A2	IonScore A2	Exp Value A2	B2	IonScore B2	Exp Value B2	C2	IonScore C2	Exp Value C2	# Missed Cleavages
	VHVQFFDDSPTR	1	7	1	C9J7Y7	S9(Phospho)	1527.66	0.002	0.08972				High	29.03	0.0814544				0
	SEEDNEIESEEEVQPK	1	4	1	C9J7Y7	S9(Phospho)	1970.78	0.002	0.1184				High	15.8	1.23886				0
A0A2R8Y6G6	2-phospho-D-glycerate hydro-lyase OS=Homo sapiens OX=9606 GN=ENO1 PE=1 SV=1 - [A0A2R8Y6G6_HUMAN]	18.43	2	6	6	7	106.447	16.82	5	5	0	1.61	1	1	29.91	2.76	1	1	434	47.2973	6.99072
	Sequence	# PSMs	# Proteins	# Protein Groups	Protein Group Accessions	Modifications	MH+ [Da]	q-Value	PEP	A2	IonScore A2	Exp Value A2	B2	IonScore B2	Exp Value B2	C2	IonScore C2	Exp Value C2	# Missed Cleavages
	YISPDQLADLYK	2	2	1	A0A2R8Y6G6		1425.73	0	7.15e-16	High	49.6	0.000832775				High	29.91	0.0875456	0
	GNPTVEVDLFTSK	1	2	1	A0A2R8Y6G6		1406.72	0	8.245e-12	High	44.62	0.00287505							0
	DATNVGDEGGFAPNILENK	1	2	1	A0A2R8Y6G6		1960.93	0	4.238e-16	High	36.47	0.0234666							0
	AAVPSGASTGIYEALELR	1	3	1	A0A2R8Y6G6		1804.95	0	8.205e-16	High	35.62	0.0229881							0
	LMIEMDGTENK	1	2	1	A0A2R8Y6G6		1280.59	0	0.0009097	High	24.31	0.244835							0
	EGLELLK	1	2	1	A0A2R8Y6G6		801.471	0.002	0.1316				High	26.83	0.162051				0
M0R2L9	40S ribosomal protein S19 (Fragment) OS=Homo sapiens OX=9606 GN=RPS19 PE=1 SV=1 - [M0R2L9_HUMAN]	18.31	4	1	1	1					0	18.31	1	1					71	8.18427	8.88037
	Sequence	# PSMs	# Proteins	# Protein Groups	Protein Group Accessions	Modifications	MH+ [Da]	q-Value	PEP	A2	IonScore A2	Exp Value A2	B2	IonScore B2	Exp Value B2	C2	IonScore C2	Exp Value C2	# Missed Cleavages
	ELAPYDENWFYTR	1	4	1	M0R2L9		1703.77	0.002	0.08018				High	21.78	0.590731				0
H3BLW5	Neural cell adhesion molecule L1 (Fragment) OS=Homo sapiens OX=9606 GN=L1CAM PE=1 SV=1 - [H3BLW5_HUMAN]	18.3	1	1	1	1	26.18	18.3	1	1									153	16.7117	4.50049
	Sequence	# PSMs	# Proteins	# Protein Groups	Protein Group Accessions	Modifications	MH+ [Da]	q-Value	PEP	A2	IonScore A2	Exp Value A2	B2	IonScore B2	Exp Value B2	C2	IonScore C2	Exp Value C2	# Missed Cleavages
	DKEDTQVDSEARPMKDETFGEYSDNEEK	1	1	1	H3BLW5	S23(Phospho)	3372.38	0	5.019e-05	High	26.18	0.176646							2
D6RD23	Rap guanine nucleotide exchange factor 6 (Fragment) OS=Homo sapiens OX=9606 GN=RAPGEF6 PE=4 SV=1 - [D6RD23_HUMAN]	18.12	6	1	1	1	36.48	18.12	1	1									149	16.6087	4.34814
	Sequence	# PSMs	# Proteins	# Protein Groups	Protein Group Accessions	Modifications	MH+ [Da]	q-Value	PEP	A2	IonScore A2	Exp Value A2	B2	IonScore B2	Exp Value B2	C2	IonScore C2	Exp Value C2	# Missed Cleavages
	LPEGPVDSEDDEEEDEEIDRTDPLQGR	1	6	1	D6RD23	S8(Phospho)	3164.31	0	3.029e-11	High	36.48	0.0200953							1
H3BUH7	Fructose-bisphosphate aldolase (Fragment) OS=Homo sapiens OX=9606 GN=ALDOA PE=1 SV=1 - [H3BUH7_HUMAN]	18.06	7	3	3	3	30.24	9.03	1	1	47.91	18.06	2	2					155	16.9068	8.55811
	Sequence	# PSMs	# Proteins	# Protein Groups	Protein Group Accessions	Modifications	MH+ [Da]	q-Value	PEP	A2	IonScore A2	Exp Value A2	B2	IonScore B2	Exp Value B2	C2	IonScore C2	Exp Value C2	# Missed Cleavages
	GILAADESTGSIAK	1	5	1	H3BUH7	S8(Phospho)	1412.67	0	6.292e-10	High	30.24	0.0889463							0
	LQSIGTENTEENR	1	7	1	H3BUH7		1490.71	0	0.04776				High	47.91	0.00143038				0
	GILAADESTGSIAKR	1	5	1	H3BUH7	S11(Phospho)	1568.77	0.004	0.1774				High	13.86	3.71885				1
H0YIL7	Protein phosphatase 1 regulatory subunit 12A (Fragment) OS=Homo sapiens OX=9606 GN=PPP1R12A PE=1 SV=1 - [H0YIL7_HUMAN]	18.01	4	1	1	1	26.9	18.01	1	1									161	18.559	5.33838
	Sequence	# PSMs	# Proteins	# Protein Groups	Protein Group Accessions	Modifications	MH+ [Da]	q-Value	PEP	A2	IonScore A2	Exp Value A2	B2	IonScore B2	Exp Value B2	C2	IonScore C2	Exp Value C2	# Missed Cleavages
	STGVSFWTQDSDENEQEQQSDTEEGSNKK	1	4	1	H0YIL7	S20(Phospho)	3370.36	0.001	0.002788	High	26.9	0.158337							1
P22626	Heterogeneous nuclear ribonucleoproteins A2/B1 OS=Homo sapiens OX=9606 GN=HNRNPA2B1 PE=1 SV=2 - [ROA2_HUMAN]	17.85	1	3	3	4	93.22	17.85	3	4									353	37.4067	8.95361
	Sequence	# PSMs	# Proteins	# Protein Groups	Protein Group Accessions	Modifications	MH+ [Da]	q-Value	PEP	A2	IonScore A2	Exp Value A2	B2	IonScore B2	Exp Value B2	C2	IonScore C2	Exp Value C2	# Missed Cleavages
	IDTIEIITDR	1	1	1	P22626		1188.65	0	3.936e-16	High	78.44	9.69591e-07							0
	NMGGPYGGGNYGPGGSGGSGGYGGR	2	1	1	P22626	S19(Phospho)	2269.87	0	1.73e-07	High	34.78	0.0148865							0
	GFGDGYNGYGGGPGGGNFGGSPGYGGGR	1	1	1	P22626	S21(Phospho)	2575.01	0	1.066e-07	High	14.39	1.91783							0
P10451	Osteopontin OS=Homo sapiens OX=9606 GN=SPP1 PE=1 SV=1 - [OSTP_HUMAN]	17.83	2	6	6	9	58.15	17.52	5	6	23.69	6.37	2	2	0	6.05	1	1	314	35.4012	4.57666
	Sequence	# PSMs	# Proteins	# Protein Groups	Protein Group Accessions	Modifications	MH+ [Da]	q-Value	PEP	A2	IonScore A2	Exp Value A2	B2	IonScore B2	Exp Value B2	C2	IonScore C2	Exp Value C2	# Missed Cleavages
	DSYETSQLDDQSAETHSHK	3	2	1	P10451	S12(Phospho)	2257.88	0	0.0009439	High	29.29	0.0669469				High	16.44	1.1826	0
	ANDESNEHSDVIDSQELSK	2	2	1	P10451	S14(Phospho)	2196.89	0.001	0.001827	High	30.32	0.0590358	High	23.69	0.277916				0
	ISHELDSASSEVN	1	1	1	P10451	S9(Phospho)	1467.6	0.001	0.001827	High	28.16	0.0682822							0
	FRISHELDSASSEVN	1	1	1	P10451	S4(Phospho); S11(Phospho)	1850.74	0.001	0.001871	High	16.44	1.18487							1
	KANDESNEHSDVIDSQELSK	1	2	1	P10451	S6(Phospho)	2324.99	0.002	0.1103				High	11.67	5.7491				1
	GKDSYETSQLDDQSAETHSHK	1	2	1	P10451	T7(Phospho)	2443.01	0.005	0.01384	High	12.32	4.4312							1
P08238	Heat shock protein HSP 90-beta OS=Homo sapiens OX=9606 GN=HSP90AB1 PE=1 SV=4 - [HS90B_HUMAN]	17.82	1	15	18	38	263.66	11.19	8	11	169.532	10.77	10	13	181.801	7.73	7	14	724	83.2121	5.03369
	Sequence	# PSMs	# Proteins	# Protein Groups	Protein Group Accessions	Modifications	MH+ [Da]	q-Value	PEP	A2	IonScore A2	Exp Value A2	B2	IonScore B2	Exp Value B2	C2	IonScore C2	Exp Value C2	# Missed Cleavages
	EISDDEAEEEKGEKEEEDK	3	1	1	P08238	S3(Phospho)	2317.91	0	3.936e-16	High	71.48	4.15704e-06				High	28.48	0.0716624	2
	ELISNASDALDK	1	2	2	P08238;P14625		1275.64	0	3.936e-16	High	66.49	1.66496e-05							0
	NPDDITQEEYGEFYK	1	1	1	P08238		1847.8	0	3.936e-16	High	64.49	2.72769e-05							0
	DDEEKPKIEDVGSDEEDDSGK	4	1	1	P08238	S13(Phospho)	2415.96	0	3.936e-16	High	57.43	0.000116382				High	41.59	0.0040184	1
	DDEEKPKIEDVGSDEEDDSGKDK	2	1	1	P08238	S13(Phospho)	2659.08	0	3.496e-10	High	49.01	0.00092695							2
	EEEDKDDEEKPKIEDVGSDEEDDSGK	4	1	1	P08238	S18(Phospho)	3046.21	0	4.989e-10	High	35.16	0.0186531				High	17.66	0.951246	2
	IEDVGSDEEDDSGKDK	3	1	1	P08238	S6(Phospho)	1817.69	0	3.509e-06	High	25.67	0.114506				High	54.45	0.000125623	1
	EKEISDDEAEEEK	4	1	1	P08238	S5(Phospho)	1630.64	0	0.003993				High	62.94	2.2918e-05	High	46.33	0.00104298	1
	EKEISDDEAEEEKGEK	2	1	1	P08238	S5(Phospho)	1944.8	0	0.01096				High	43.88	0.00280139				2
	EISDDEAEEEKGEK	3	1	1	P08238	S3(Phospho)	1687.66	0	0.02594				High	40.43	0.00384031	High	39.79	0.00410896	1
	EISDDEAEEEK	1	1	1	P08238	S3(Phospho)	1373.5	0	0.03721				High	38.12	0.00393134				0
	ADLINNLGTIAK	2	2	2	P07900;P08238		1242.71	0.001	0.0009097	High	39.47	0.00492026				High	20.11	0.495295	0
	IEDVGSDEEDDSGK	2	1	1	P08238	S6(Phospho)	1574.58	0.002	0.06727				High	40.44	0.00295493				0
	IEDVGSDEEDDSGKDKK	2	1	1	P08238	S6(Phospho)	1945.79	0.002	0.1101				High	31.39	0.0454905				2
	YIDQEELNK	1	2	2	P07900;P08238		1151.56	0.002	0.06747				High	23.3	0.317826				0
	SIYYITGESK	1	1	1	P08238		1160.58	0.002	0.09143				High	20.26	0.740325				0
	EQVANSAFVER	1	1	1	P08238		1249.62	0.002	0.08097				High	20.04	0.750555				0
	HLEINPDHPIVETLR	1	1	1	P08238		1782.95	0.005	0.1942				High	23.87	0.253916				0
P0DMV9	Heat shock 70 kDa protein 1B OS=Homo sapiens OX=9606 GN=HSPA1B PE=1 SV=1 - [HS71B_HUMAN]	17.78	2	5	7	12	136.591	10.61	5	7	29.86	9.67	3	3		0			641	70.009	5.65576
	Sequence	# PSMs	# Proteins	# Protein Groups	Protein Group Accessions	Modifications	MH+ [Da]	q-Value	PEP	A2	IonScore A2	Exp Value A2	B2	IonScore B2	Exp Value B2	C2	IonScore C2	Exp Value C2	# Missed Cleavages
	IINEPTAAAIAYGLDR	2	2	1	P0DMV9		1687.9	0	3.936e-16	High	70.27	5.82628e-06	High	21.05	0.497054				0
	VEIIANDQGNR	4	13	3	P11021;E9PKE3;P0DMV9		1228.62	0	9.392e-09	High	41.78	0.00505108				High	47.21	0.00147999	0
	DAGVIAGLNVLR	1	4	1	P0DMV9		1197.7	0	3.598e-08	High	40.84	0.0024889							0
	TTPSYVAFTDTER	1	12	2	P0DMV9;E9PKE3		1487.7	0	1.234e-07	High	36.77	0.0169775							0
	ATAGDTHLGGEDFDNR	2	4	1	P0DMV9		1675.73	0	3.176e-09	High	31.97	0.0477769							0
	NQVALNPQNTVFDAK	1	2	1	P0DMV9		1658.85	0.002	0.05882				High	29.86	0.0844799				0
	ELEQVCNPIISGLYQGAGGPGPGGFGAQGPK	1	2	1	P0DMV9	C6(Carbamidomethyl)	3055.51	0.002	0.1538				High	15.35	2.64757				0
A0A087X1A9	Vesicle-trafficking protein SEC22b (Fragment) OS=Homo sapiens OX=9606 GN=SEC22B PE=1 SV=1 - [A0A087X1A9_HUMAN]	17.72	2	1	1	2	76.47	17.72	1	1					32.58	17.72	1	1	79	8.77644	5.18604
	Sequence	# PSMs	# Proteins	# Protein Groups	Protein Group Accessions	Modifications	MH+ [Da]	q-Value	PEP	A2	IonScore A2	Exp Value A2	B2	IonScore B2	Exp Value B2	C2	IonScore C2	Exp Value C2	# Missed Cleavages
	NLGSINTELQDVQR	2	2	1	A0A087X1A9	S4(Phospho)	1666.78	0	3.936e-16	High	76.47	2.08066e-06				High	32.58	0.0489693	0
Q9NRF9	DNA polymerase epsilon subunit 3 OS=Homo sapiens OX=9606 GN=POLE3 PE=1 SV=1 - [DPOE3_HUMAN]	17.69	1	1	1	1	37.9	17.69	1	1									147	16.8493	4.7417
	Sequence	# PSMs	# Proteins	# Protein Groups	Protein Group Accessions	Modifications	MH+ [Da]	q-Value	PEP	A2	IonScore A2	Exp Value A2	B2	IonScore B2	Exp Value B2	C2	IonScore C2	Exp Value C2	# Missed Cleavages
	SRDEDNDEDEERLEEEEQNEEEEVDN	1	1	1	Q9NRF9		3224.24	0	0.0009097	High	37.9	0.00866047							2
G5E972	Lamina-associated polypeptide 2, isoforms beta/gamma OS=Homo sapiens OX=9606 GN=TMPO PE=1 SV=1 - [G5E972_HUMAN]	17.63	2	1	5	17	107.3	12.32	3	7	44.18	17.63	4	6	49.5	6.28	1	4	414	46.2782	9.02686
	Sequence	# PSMs	# Proteins	# Protein Groups	Protein Group Accessions	Modifications	MH+ [Da]	q-Value	PEP	A2	IonScore A2	Exp Value A2	B2	IonScore B2	Exp Value B2	C2	IonScore C2	Exp Value C2	# Missed Cleavages
	SSTPLPTISSSAENTR	1	3	2	G5E972;P42166	T3(Phospho)	1727.79	0	6.943e-09	High	42.27	0.00575138							0
	GPPDFSSDEEREPTPVLGSGAAAAGR	5	3	2	G5E972;P42166	S6(Phospho)	2650.18	0	3.936e-16	High	40.5	0.00989734				High	38.45	0.0146533	1
	GPPDFSSDEEREPTPVLGSGAAAAGR	5	3	2	G5E972;P42166	S6(Phospho); S7(Phospho)	2730.15	0	9.008e-16	High	35.92	0.0218759	High	32.99	0.0430508	High	22.34	0.436709	1
	LREQGTESRSSTPLPTISSSAENTR	2	3	2	G5E972;P42166	S10(Phospho); S11(Phospho); T12(Phospho)	2944.25	0	2.365e-06	High	20.13	0.911794	High	19.28	1.1095				2
	LREQGTESRSSTPLPTISSSAENTR	2	3	2	G5E972;P42166	S10(Phospho); S11(Phospho)	2864.29	0.002	0.05954				High	23.96	0.440564				2
	EQGTESRSSTPLPTISSSAENTR	1	3	2	G5E972;P42166	S6(Phospho); S8(Phospho)	2595.1	0.002	0.1349				High	21.2	0.627344				1
	QNGSNDSDRYSDNEEDSKIELK	1	2	1	G5E972	S11(Phospho)	2623.08	0.002	0.07514				High	14.67	2.33547				2
Q5JP53	Tubulin beta chain OS=Homo sapiens OX=9606 GN=TUBB PE=1 SV=1 - [Q5JP53_HUMAN]	17.61	7	3	6	8	123.17	14.79	5	5	25.8	2.82	1	1	22.22	5.63	2	2	426	47.736	4.80518
	Sequence	# PSMs	# Proteins	# Protein Groups	Protein Group Accessions	Modifications	MH+ [Da]	q-Value	PEP	A2	IonScore A2	Exp Value A2	B2	IonScore B2	Exp Value B2	C2	IonScore C2	Exp Value C2	# Missed Cleavages
	IMNTFSVVPSPK	1	5	1	Q5JP53		1319.7	0	3.936e-16	High	59.35	8.2579e-05							0
	EVDEQMLNVQNK	1	6	1	Q5JP53		1446.69	0	0.0009097	High	49.09	0.00102656							0
	NSSYFVEWIPNNVK	2	11	2	Q5JP53;Q13509		1696.84	0	5.463e-13	High	41.58	0.00676954				High	22.22	0.564403	0
	LAVNMVPFPR	2	11	2	Q5JP53;Q13509		1143.63	0	7.785e-09	High	41.52	0.00482715				High	16.89	1.35372	0
	AILVDLEPGTMDSVR	1	6	2	Q5JP53;Q13509		1615.84	0	1.514e-05	High	28.43	0.120366							0
	ISVYYNEATGGK	1	2	1	Q5JP53		1301.64	0	0.03303				High	25.8	0.203846				0
D6RC77	Phosphoacetylglucosamine mutase (Fragment) OS=Homo sapiens OX=9606 GN=PGM3 PE=1 SV=1 - [D6RC77_HUMAN]	17.54	8	1	1	2	28.74	17.54	1	2									114	12.3722	6.354
	Sequence	# PSMs	# Proteins	# Protein Groups	Protein Group Accessions	Modifications	MH+ [Da]	q-Value	PEP	A2	IonScore A2	Exp Value A2	B2	IonScore B2	Exp Value B2	C2	IonScore C2	Exp Value C2	# Missed Cleavages
	STIGVMVTASHNPEEDNGVK	2	8	1	D6RC77	S10(Phospho)	2164.96	0	1.098e-07	High	31.01	0.0787746							0
D6RGJ8	WD repeat-containing protein 55 OS=Homo sapiens OX=9606 GN=WDR55 PE=1 SV=1 - [D6RGJ8_HUMAN]	17.52	2	1	1	1	40.05	17.52	1	1									137	15.177	4.57666
	Sequence	# PSMs	# Proteins	# Protein Groups	Protein Group Accessions	Modifications	MH+ [Da]	q-Value	PEP	A2	IonScore A2	Exp Value A2	B2	IonScore B2	Exp Value B2	C2	IonScore C2	Exp Value C2	# Missed Cleavages
	TCEERPAEDGSDEEDPDSMEAPTR	1	2	1	D6RGJ8	C2(Carbamidomethyl); S11(Phospho)	2803.04	0	7.393e-16	High	40.05	0.00385041							0
H7C5M1	RNA-binding protein 34 (Fragment) OS=Homo sapiens OX=9606 GN=RBM34 PE=1 SV=1 - [H7C5M1_HUMAN]	17.44	4	1	1	1					25.72	17.44	1	1					86	9.46979	9.87646
	Sequence	# PSMs	# Proteins	# Protein Groups	Protein Group Accessions	Modifications	MH+ [Da]	q-Value	PEP	A2	IonScore A2	Exp Value A2	B2	IonScore B2	Exp Value B2	C2	IonScore C2	Exp Value C2	# Missed Cleavages
	KRSVQEGENPDDGVR	1	4	1	H7C5M1	S3(Phospho)	1765.79	0.002	0.06891				High	25.72	0.228131				2
P52926	High mobility group protein HMGI-C OS=Homo sapiens OX=9606 GN=HMGA2 PE=1 SV=1 - [HMGA2_HUMAN]	17.43	1	1	1	1					53.94	17.43	1	1					109	11.8251	10.6235
	Sequence	# PSMs	# Proteins	# Protein Groups	Protein Group Accessions	Modifications	MH+ [Da]	q-Value	PEP	A2	IonScore A2	Exp Value A2	B2	IonScore B2	Exp Value B2	C2	IonScore C2	Exp Value C2	# Missed Cleavages
	KPAQEETEETSSQESAEED	1	1	1	P52926	S15(Phospho)	2203.85	0	0.00376				High	53.94	0.000178815				0
H3BNA1	Ubiquitin carboxyl-terminal hydrolase 10 (Fragment) OS=Homo sapiens OX=9606 GN=USP10 PE=1 SV=1 - [H3BNA1_HUMAN]	17.33	2	1	1	3	61.18	17.33	1	2					33	17.33	1	1	150	16.9712	4.57666
	Sequence	# PSMs	# Proteins	# Protein Groups	Protein Group Accessions	Modifications	MH+ [Da]	q-Value	PEP	A2	IonScore A2	Exp Value A2	B2	IonScore B2	Exp Value B2	C2	IonScore C2	Exp Value C2	# Missed Cleavages
	NHSVNEEEQEEQGEGSEDEWEQVGPR	3	2	1	H3BNA1	S16(Phospho)	3107.22	0	3.936e-16	High	61.18	4.58009e-05				High	33	0.0259364	0
P07237	Protein disulfide-isomerase OS=Homo sapiens OX=9606 GN=P4HB PE=1 SV=3 - [PDIA1_HUMAN]	17.32	4	6	6	6	54.9212	6.69	3	3	33.21	10.63	3	3					508	57.0807	4.86865
	Sequence	# PSMs	# Proteins	# Protein Groups	Protein Group Accessions	Modifications	MH+ [Da]	q-Value	PEP	A2	IonScore A2	Exp Value A2	B2	IonScore B2	Exp Value B2	C2	IonScore C2	Exp Value C2	# Missed Cleavages
	VDATEESDLAQQYGVR	1	3	1	P07237		1780.84	0	3.936e-16	High	45.87	0.00237339							0
	FLESGGQDGAGDDDDLEDLEEAEEPDMEEDDDQK	1	3	1	P07237		3757.46	0	0.04678				High	18.03	0.894809				0
	ENLLDFIK	1	4	1	P07237		991.545	0.001	0.0009097	High	32.32	0.0263469							0
	EADDIVNWLK	1	1	1	P07237		1202.61	0.001	0.001827	High	19.44	0.766761							0
	LITLEEEMTK	1	3	1	P07237		1206.63	0.002	0.1501				High	29.02	0.0927324				0
	NFEDVAFDEK	1	3	1	P07237		1213.54	0.002	0.09878				High	24.16	0.22044				0
Q8IYB3	Serine/arginine repetitive matrix protein 1 OS=Homo sapiens OX=9606 GN=SRRM1 PE=1 SV=2 - [SRRM1_HUMAN]	17.26	4	14	14	30	95.33	6.97	5	8	49.66	12.06	10	11	95.9722	9.85	7	11	904	102.274	11.8394
	Sequence	# PSMs	# Proteins	# Protein Groups	Protein Group Accessions	Modifications	MH+ [Da]	q-Value	PEP	A2	IonScore A2	Exp Value A2	B2	IonScore B2	Exp Value B2	C2	IonScore C2	Exp Value C2	# Missed Cleavages
	KETESEAEDNLDDLEK	4	2	1	Q8IYB3	S5(Phospho)	1944.79	0	2.704e-14	High	60.31	6.48051e-05				High	63.02	3.18787e-05	1
	VPKPEPIPEPKEPSPEK	4	4	1	Q8IYB3	S14(Phospho)	1978	0	8.473e-06	High	33.55	0.0400284				High	21.36	0.714688	1
	RRTPTPPPR	1	4	1	Q8IYB3	T3(Phospho); T5(Phospho)	1237.56	0	0.04603				High	22.45	0.356102				2
	RLSPSASPPR	3	4	1	Q8IYB3	S3(Phospho); S7(Phospho)	1227.52	0.001	0.01269	High	19.44	0.594979				High	24.29	0.161432	1
	HRPSPPATPPPK	4	4	1	Q8IYB3	S4(Phospho); T8(Phospho)	1441.63	0.001	0.001335				High	24.66	0.272729	High	30.23	0.0669583	0
	APQTSSSPPPVR	2	4	1	Q8IYB3	S7(Phospho)	1303.6	0.001	0.01906				High	14.69	2.58964	High	15.11	2.29389	0
	RYSPPIQR	1	4	1	Q8IYB3	S3(Phospho)	1096.53	0.002	0.01384	High	20.61	0.794664							1
	KVELSESEEDK	2	4	1	Q8IYB3	S7(Phospho)	1372.59	0.002	0.1057				High	47.31	0.00105895	High	28.45	0.0772317	1
	RRSPSPAPPPR	1	4	1	Q8IYB3	S3(Phospho); S5(Phospho)	1377.62	0.002	0.1223				High	21.64	0.482584				2
	RRTASPPPPPK	2	4	1	Q8IYB3	T3(Phospho); S5(Phospho)	1363.63	0.002	0.09571				High	21.6	0.470099	High	36.91	0.0130982	2
	SRVSVSPGR	1	4	1	Q8IYB3	S4(Phospho); S6(Phospho)	1104.46	0.002	0.1607				High	20.44	0.428782				1
	RRTPSPPPR	1	4	1	Q8IYB3	T3(Phospho); S5(Phospho)	1223.54	0.002	0.1044				High	18.54	0.750179				2
	KETESEAEDNLDDLEK	1	2	1	Q8IYB3	T3(Phospho); S5(Phospho)	2024.77	0.002	0.08634				High	13.92	1.71125				1
	RYSPSPPPK	2	4	1	Q8IYB3	S3(Phospho); S5(Phospho)	1188.49	0.002	0.1577				High	13.79	1.48748				1
	EKTPELPEPSVK	1	4	1	Q8IYB3	T3(Phospho)	1433.69	0.006	0.02528	High	18.89	1.00392							1
G5E9Q4	Interferon-inducible double-stranded RNA-dependent protein kinase activator A OS=Homo sapiens OX=9606 GN=PRKRA PE=1 SV=1 - [G5E9Q4_HUMAN]	17.14	2	1	1	1	22.66	17.14	1	1						0			105	11.5019	9.17334
	Sequence	# PSMs	# Proteins	# Protein Groups	Protein Group Accessions	Modifications	MH+ [Da]	q-Value	PEP	A2	IonScore A2	Exp Value A2	B2	IonScore B2	Exp Value B2	C2	IonScore C2	Exp Value C2	# Missed Cleavages
	AEAPPLEREDSGTFSLGK	1	2	1	G5E9Q4	S11(Phospho)	1983.91	0.007	0.08509	High	22.66	0.526283							1
H0YCH3	Gastrin-releasing peptide (Fragment) OS=Homo sapiens OX=9606 GN=GRP PE=4 SV=1 - [H0YCH3_HUMAN]	17.14	1	1	1	2						0			28.79	17.14	1	2	35	3.78401	12.0005
	Sequence	# PSMs	# Proteins	# Protein Groups	Protein Group Accessions	Modifications	MH+ [Da]	q-Value	PEP	A2	IonScore A2	Exp Value A2	B2	IonScore B2	Exp Value B2	C2	IonScore C2	Exp Value C2	# Missed Cleavages
	XISSLR	2	1	1	H0YCH3	X1(R); S3(Phospho); S4(Phospho)	891.38	0.001	0.005608							High	28.79	0.0435367	1
P06748	Nucleophosmin OS=Homo sapiens OX=9606 GN=NPM1 PE=1 SV=2 - [NPM_HUMAN]	17.01	1	2	2	15	156.185	17.01	2	11					30.4633	17.01	2	4	294	32.5548	4.77979
	Sequence	# PSMs	# Proteins	# Protein Groups	Protein Group Accessions	Modifications	MH+ [Da]	q-Value	PEP	A2	IonScore A2	Exp Value A2	B2	IonScore B2	Exp Value B2	C2	IonScore C2	Exp Value C2	# Missed Cleavages
	CGSGPVHISGQHLVAVEEDAESEDEEEEDVK	6	1	1	P06748	C1(Carbamidomethyl); S22(Phospho)	3460.44	0	3.936e-16	High	86.42	2.14352e-07				High	14.32	3.20086	0
	DELHIVEAEAMNYEGSPIK	6	1	1	P06748	S16(Phospho)	2224.99	0	3.936e-16	High	49.72	0.000953004				High	25.01	0.270384	0
	DELHIVEAEAMNYEGSPIK	2	1	1	P06748	M11(Oxidation); S16(Phospho)	2240.98	0	3.936e-16	High	26.79	0.204699				High	20.9	0.739269	0
	DELHIVEAEAMNYEGSPIK	1	1	1	P06748		2145.02	0	0.0009097	High	21.83	0.656801							0
H0YJ03	Proteasome subunit alpha type-3 (Fragment) OS=Homo sapiens OX=9606 GN=PSMA3 PE=1 SV=1 - [H0YJ03_HUMAN]	16.87	3	1	1	2	0	16.87	1	1					0	16.87	1	1	83	9.70973	4.86865
	Sequence	# PSMs	# Proteins	# Protein Groups	Protein Group Accessions	Modifications	MH+ [Da]	q-Value	PEP	A2	IonScore A2	Exp Value A2	B2	IonScore B2	Exp Value B2	C2	IonScore C2	Exp Value C2	# Missed Cleavages
	ESLKEEDESDDDNM	2	3	1	H0YJ03	S9(Phospho)	1735.59	0	8.395e-16	High	20.1	0.182743				High	21.95	0.0986117	1
V9GYQ9	DDB1- and CUL4-associated factor 8 (Fragment) OS=Homo sapiens OX=9606 GN=DCAF8 PE=1 SV=1 - [V9GYQ9_HUMAN]	16.8	4	1	1	1	44.28	16.8	1	1									125	14.0162	4.25928
	Sequence	# PSMs	# Proteins	# Protein Groups	Protein Group Accessions	Modifications	MH+ [Da]	q-Value	PEP	A2	IonScore A2	Exp Value A2	B2	IonScore B2	Exp Value B2	C2	IonScore C2	Exp Value C2	# Missed Cleavages
	VHDRSEEEEEEEEEEEEEQPR	1	4	1	V9GYQ9	S5(Phospho)	2752.04	0	5.084e-16	High	44.28	0.00174868							1
O95218	Zinc finger Ran-binding domain-containing protein 2 OS=Homo sapiens OX=9606 GN=ZRANB2 PE=1 SV=2 - [ZRAB2_HUMAN]	16.67	1	4	4	8	132.55	16.67	4	6					36.76	12.42	2	2	330	37.382	10.0083
	Sequence	# PSMs	# Proteins	# Protein Groups	Protein Group Accessions	Modifications	MH+ [Da]	q-Value	PEP	A2	IonScore A2	Exp Value A2	B2	IonScore B2	Exp Value B2	C2	IonScore C2	Exp Value C2	# Missed Cleavages
	ENVEYIEREESDGEYDEFGRK	2	1	1	O95218	S11(Phospho)	2673.1	0	3.936e-16	High	67.67	1.46719e-05				High	36.76	0.0160994	2
	EVEDKESEGEEEDEDEDLSK	3	1	1	O95218	S7(Phospho)	2419.91	0	3.936e-16	High	50.82	0.00037423				High	14.93	1.14888	1
	ENVEYIEREESDGEYDEFGR	2	1	1	O95218	S11(Phospho)	2545.01	0	4.297e-09	High	41.08	0.00490123							1
	YNLDASEEEDSNKK	1	1	1	O95218	S6(Phospho)	1721.69	0.005	0.01469	High	27.71	0.0912401							1
D6R9L5	Protein DEK OS=Homo sapiens OX=9606 GN=DEK PE=1 SV=2 - [D6R9L5_HUMAN]	16.67	7	1	1	3	43.28	16.67	1	3									162	18.7973	4.7417
	Sequence	# PSMs	# Proteins	# Protein Groups	Protein Group Accessions	Modifications	MH+ [Da]	q-Value	PEP	A2	IonScore A2	Exp Value A2	B2	IonScore B2	Exp Value B2	C2	IonScore C2	Exp Value C2	# Missed Cleavages
	EPEMPGPREESEEEEDEDDEEEEEEEK	1	7	1	D6R9L5	M4(Oxidation); S11(Phospho)	3375.2	0	2.137e-13	High	43.28	0.00139324							1
	EPEMPGPREESEEEEDEDDEEEEEEEK	2	7	1	D6R9L5	S11(Phospho)	3359.2	0	1.168e-10	High	22.65	0.145591							1
Q6NZI2	Caveolae-associated protein 1 OS=Homo sapiens OX=9606 GN=CAVIN1 PE=1 SV=1 - [CAVN1_HUMAN]	16.41	1	3	3	12	58.47	15.38	2	3	32.96	16.41	2	8	34.46	9.23	1	1	390	43.4498	5.60498
	Sequence	# PSMs	# Proteins	# Protein Groups	Protein Group Accessions	Modifications	MH+ [Da]	q-Value	PEP	A2	IonScore A2	Exp Value A2	B2	IonScore B2	Exp Value B2	C2	IonScore C2	Exp Value C2	# Missed Cleavages
	EGEELGEGERPEEDAAALELSSDEAVEVEEVIEESR	6	1	1	Q6NZI2	S21(Phospho); S22(Phospho)	4090.72	0	3.936e-16	High	49.01	0.000975307	High	23.5	0.345063	High	34.46	0.0251384	0
	EGEELGEGERPEEDAAALELSSDEAVEVEEVIEESR	2	1	1	Q6NZI2	S22(Phospho)	4010.74	0.002	0.06273				High	27.96	0.1446				0
	RGSSPDVHALLEITEESDAVLVDKSDSD	1	1	1	Q6NZI2	S3(Phospho); S4(Phospho); S27(Phospho)	3224.34	0.002	0.05531				High	15.22	2.56118				2
	RGSSPDVHALLEITEESDAVLVDKSDSD	2	1	1	Q6NZI2	S3(Phospho); S4(Phospho); S25(Phospho); S27(Phospho)	3304.3	0.004	0.1877				High	11.09	5.25953				2
	RGSSPDVHALLEITEESDAVLVDK	1	1	1	Q6NZI2	S3(Phospho); S4(Phospho)	2740.25	0.005	0.01384	High	34.46	0.0384417							1
H0YC88	Synembryn-A (Fragment) OS=Homo sapiens OX=9606 GN=RIC8A PE=1 SV=1 - [H0YC88_HUMAN]	16.33	3	1	1	4	68.3733	16.33	1	3					23.87	16.33	1	1	147	16.0218	5.05908
	Sequence	# PSMs	# Proteins	# Protein Groups	Protein Group Accessions	Modifications	MH+ [Da]	q-Value	PEP	A2	IonScore A2	Exp Value A2	B2	IonScore B2	Exp Value B2	C2	IonScore C2	Exp Value C2	# Missed Cleavages
	GLMAGGRPEGQYSEDEDTDTDEYK	3	3	1	H0YC88	S13(Phospho); T18(Phospho)	2823.04	0	3.936e-16	High	47.19	0.000622612				High	23.87	0.113216	0
	GLMAGGRPEGQYSEDEDTDTDEYK	1	3	1	H0YC88	S13(Phospho)	2743.08	0	3.936e-16	High	26.6	0.115295							0
H7C0Y9	HCLS1-binding protein 3 (Fragment) OS=Homo sapiens OX=9606 GN=HS1BP3 PE=1 SV=1 - [H7C0Y9_HUMAN]	16.22	4	1	1	1	24.51	16.22	1	1									111	11.7961	5.85889
	Sequence	# PSMs	# Proteins	# Protein Groups	Protein Group Accessions	Modifications	MH+ [Da]	q-Value	PEP	A2	IonScore A2	Exp Value A2	B2	IonScore B2	Exp Value B2	C2	IonScore C2	Exp Value C2	# Missed Cleavages
	KLSPQDPSEDVSSVDPLK	1	4	1	H7C0Y9	S3(Phospho)	2020.95	0	5.905e-12	High	24.51	0.357891							1
J3KSH8	Jupiter microtubule-associated homolog 1 (Fragment) OS=Homo sapiens OX=9606 GN=JPT1 PE=1 SV=8 - [J3KSH8_HUMAN]	16.13	3	1	1	5	76.59	16.13	1	2					97.3467	16.13	1	3	93	9.51057	4.4751
	Sequence	# PSMs	# Proteins	# Protein Groups	Protein Group Accessions	Modifications	MH+ [Da]	q-Value	PEP	A2	IonScore A2	Exp Value A2	B2	IonScore B2	Exp Value B2	C2	IonScore C2	Exp Value C2	# Missed Cleavages
	RNSSEASSGDFLDLK	5	3	1	J3KSH8	S3(Phospho)	1705.73	0	7.487e-11	High	51.39	0.000554745				High	59.16	9.03975e-05	1
P09525	Annexin A4 OS=Homo sapiens OX=9606 GN=ANXA4 PE=1 SV=4 - [ANXA4_HUMAN]	15.99	2	4	4	4	60.04	12.54	3	3	38.35	3.45	1	1					319	35.8601	6.12549
	Sequence	# PSMs	# Proteins	# Protein Groups	Protein Group Accessions	Modifications	MH+ [Da]	q-Value	PEP	A2	IonScore A2	Exp Value A2	B2	IonScore B2	Exp Value B2	C2	IonScore C2	Exp Value C2	# Missed Cleavages
	GAGTDEGCLIEILASR	1	1	1	P09525	C8(Carbamidomethyl)	1661.82	0	6.599e-16	High	43.4	0.00396067							0
	AASGFNAMEDAQTLR	1	2	1	P09525		1581.73	0	1.258e-07	High	22.76	0.432735							0
	GLGTDDNTLIR	1	2	1	P09525		1174.61	0	0.04087				High	38.35	0.0105057				0
	AEIDMLDIR	1	2	1	P09525		1075.55	0.001	0.001827	High	27.88	0.106067							0
K7EMU2	cAMP-dependent protein kinase type I-alpha regulatory subunit (Fragment) OS=Homo sapiens OX=9606 GN=PRKAR1A PE=1 SV=1 - [K7EMU2_HUMAN]	15.93	8	1	1	3	43.79	15.93	1	3									113	12.8605	5.63037
	Sequence	# PSMs	# Proteins	# Protein Groups	Protein Group Accessions	Modifications	MH+ [Da]	q-Value	PEP	A2	IonScore A2	Exp Value A2	B2	IonScore B2	Exp Value B2	C2	IonScore C2	Exp Value C2	# Missed Cleavages
	TDSREDEISPPPPNPVVK	3	8	1	K7EMU2	S9(Phospho)	2056.96	0	1.404e-11	High	35.39	0.0284154							1
C9JMI3	Transcriptional repressor p66-alpha (Fragment) OS=Homo sapiens OX=9606 GN=GATAD2A PE=1 SV=1 - [C9JMI3_HUMAN]	15.87	5	1	1	1					20.7	15.87	1	1					126	13.5967	5.19873
	Sequence	# PSMs	# Proteins	# Protein Groups	Protein Group Accessions	Modifications	MH+ [Da]	q-Value	PEP	A2	IonScore A2	Exp Value A2	B2	IonScore B2	Exp Value B2	C2	IonScore C2	Exp Value C2	# Missed Cleavages
	RPPSPDVIVLSDNEQPSSPR	1	5	1	C9JMI3	S4(Phospho); S18(Phospho)	2350.05	0	0.05097				High	20.7	0.869863				0
P27824	Calnexin OS=Homo sapiens OX=9606 GN=CANX PE=1 SV=2 - [CALX_HUMAN]	15.71	1	9	9	35	93.4006	13.01	7	19	110.2	6.42	5	7	84.0233	5.74	4	9	592	67.5259	4.60205
	Sequence	# PSMs	# Proteins	# Protein Groups	Protein Group Accessions	Modifications	MH+ [Da]	q-Value	PEP	A2	IonScore A2	Exp Value A2	B2	IonScore B2	Exp Value B2	C2	IonScore C2	Exp Value C2	# Missed Cleavages
	TPYTIMFGPDK	1	1	1	P27824		1269.62	0	3.837e-08	High	39.61	0.00880088							0
	AEEDEILNRSPR	8	1	1	P27824	S10(Phospho)	1508.68	0	5.474e-05	High	33.91	0.0272723				High	25.86	0.172254	1
	QKSDAEEDGGTVSQEEEDR	2	1	1	P27824	S3(Phospho); S13(Phospho)	2268.82	0	3.936e-16	High	33.48	0.0149432							1
	SDAEEDGGTVSQEEEDRKPK	4	1	1	P27824	S11(Phospho)	2285.94	0	6.536e-13	High	31.08	0.0541982				High	17.57	1.17065	1
	QKSDAEEDGGTVSQEEEDR	4	1	1	P27824	S3(Phospho)	2188.84	0	1.773e-11	High	21.01	0.417252	High	21.18	0.388279	High	59.86	4.78685e-05	1
	QKSDAEEDGGTVSQEEEDRKPK	4	1	1	P27824	S3(Phospho); S13(Phospho)	2622.06	0	0.04625	High	19.17	0.794152	High	42.06	0.00414141				2
	QKSDAEEDGGTVSQEEEDRKPK	6	1	1	P27824	S3(Phospho)	2542.1	0	3.138e-08	High	17.72	1.57465	High	13.71	3.95168	High	27.09	0.171591	2
	SDAEEDGGTVSQEEEDR	1	1	1	P27824	S11(Phospho)	1932.7	0	0.01151				High	63.03	1.46086e-05				0
	APVPTGEVYFADSFDR	1	1	1	P27824		1770.84	0	0.04765				High	41.68	0.00655092				0
	IVDDWANDGWGLK	1	1	1	P27824		1488.71	0.001	0.001269	High	29.09	0.105122							0
	QKSDAEEDGGTVSQEEEDRKPK	1	1	1	P27824		2462.13	0.001	0.001056	High	21.14	0.824892							2
	IPDPEAVKPDDWDEDAPAK	1	1	1	P27824		2107.98	0.001	0.0009097	High	14.25	3.98951							0
	SDAEEDGGTVSQEEEDRKPK	1	1	1	P27824	S1(Phospho); S11(Phospho)	2365.91	0.007	0.2168				High	17.91	0.768588				1
H0YI43	Myosin light polypeptide 6 (Fragment) OS=Homo sapiens OX=9606 GN=MYL6 PE=1 SV=1 - [H0YI43_HUMAN]	15.66	11	1	1	1	54.95	15.66	1	1									83	9.24322	4.77979
	Sequence	# PSMs	# Proteins	# Protein Groups	Protein Group Accessions	Modifications	MH+ [Da]	q-Value	PEP	A2	IonScore A2	Exp Value A2	B2	IonScore B2	Exp Value B2	C2	IonScore C2	Exp Value C2	# Missed Cleavages
	DQGTYEDYVEGLR	1	11	1	H0YI43		1544.69	0	3.936e-16	High	54.95	0.000219284							0
E9PJF4	Chloride channel, nucleotide sensitive 1A OS=Homo sapiens OX=9606 GN=CLNS1A PE=1 SV=1 - [E9PJF4_HUMAN]	15.64	2	2	2	6	90.4533	15.64	2	4					22.81	15.64	1	2	179	19.7309	4.09424
	Sequence	# PSMs	# Proteins	# Protein Groups	Protein Group Accessions	Modifications	MH+ [Da]	q-Value	PEP	A2	IonScore A2	Exp Value A2	B2	IonScore B2	Exp Value B2	C2	IonScore C2	Exp Value C2	# Missed Cleavages
	EPVADEEEEDSDDDVEPITEFR	1	2	1	E9PJF4	S11(Phospho)	2645.03	0	3.936e-16	High	61.23	4.10202e-05							0
	FEEESKEPVADEEEEDSDDDVEPITEFR	5	2	1	E9PJF4	S17(Phospho)	3394.37	0	3.936e-16	High	42.02	0.00464763				High	22.81	0.318349	1
P16403	Histone H1.2 OS=Homo sapiens OX=9606 GN=H1-2 PE=1 SV=2 - [H12_HUMAN]	15.49	3	4	4	5	93.7099	11.27	3	3	38.89	4.23	1	1	32.03	5.63	1	1	213	21.3517	10.9312
	Sequence	# PSMs	# Proteins	# Protein Groups	Protein Group Accessions	Modifications	MH+ [Da]	q-Value	PEP	A2	IonScore A2	Exp Value A2	B2	IonScore B2	Exp Value B2	C2	IonScore C2	Exp Value C2	# Missed Cleavages
	ASGPPVSELITK	2	3	1	P16403		1198.67	0	2.607e-15	High	59.12	5.64548e-05				High	32.03	0.0298268	0
	ALAAAGYDVEK	1	3	1	P16403		1107.57	0	0.0001112	High	54.43	0.00024916							0
	KASGPPVSELITK	1	3	1	P16403	S3(Phospho)	1406.73	0.001	0.001791	High	26.43	0.181667							1
	SGVSLAALK	1	3	1	P16403		845.509	0.002	0.06722				High	38.89	0.00724374				0
Q8IVP5	FUN14 domain-containing protein 1 OS=Homo sapiens OX=9606 GN=FUNDC1 PE=1 SV=1 - [FUND1_HUMAN]	15.48	1	1	1	2	35.19	15.48	1	2									155	17.1668	8.6167
	Sequence	# PSMs	# Proteins	# Protein Groups	Protein Group Accessions	Modifications	MH+ [Da]	q-Value	PEP	A2	IonScore A2	Exp Value A2	B2	IonScore B2	Exp Value B2	C2	IonScore C2	Exp Value C2	# Missed Cleavages
	NPPPQDYESDDDSYEVLDLTEYAR	2	1	1	Q8IVP5	S9(Phospho)	2911.19	0	3.936e-16	High	35.19	0.0223386							0
F8VTQ5	Heterogeneous nuclear ribonucleoprotein A1 (Fragment) OS=Homo sapiens OX=9606 GN=HNRNPA1 PE=1 SV=1 - [F8VTQ5_HUMAN]	15.17	4	3	3	14	60.2533	15.17	3	7	30.06	8.28	1	1	48.21	8.28	2	6	145	16.5262	6.63916
	Sequence	# PSMs	# Proteins	# Protein Groups	Protein Group Accessions	Modifications	MH+ [Da]	q-Value	PEP	A2	IonScore A2	Exp Value A2	B2	IonScore B2	Exp Value B2	C2	IonScore C2	Exp Value C2	# Missed Cleavages
	SESPKEPEQLR	7	4	1	F8VTQ5	S1(Phospho)	1379.61	0	1.361e-05	High	37.65	0.0113382				High	39.09	0.008083	1
	IEVIEIMTDR	1	3	1	F8VTQ5		1218.64	0	3.345e-15	High	32.58	0.0418751							0
	SESPKEPEQLRK	6	4	1	F8VTQ5	S3(Phospho)	1507.72	0.001	0.001827	High	21.32	0.630539	High	30.06	0.0857077	High	24.4	0.28901	2
P09429	High mobility group protein B1 OS=Homo sapiens OX=9606 GN=HMGB1 PE=1 SV=3 - [HMGB1_HUMAN]	14.88	1	1	1	1					45.48	14.88	1	1					215	24.8782	5.74463
	Sequence	# PSMs	# Proteins	# Protein Groups	Protein Group Accessions	Modifications	MH+ [Da]	q-Value	PEP	A2	IonScore A2	Exp Value A2	B2	IonScore B2	Exp Value B2	C2	IonScore C2	Exp Value C2	# Missed Cleavages
	KKEEEEDEEDEEDEEEEEDEEDEDEEEDDDDE	1	1	1	P09429		4006.34	0	0.01377				High	45.48	0.000498325				2
A0A494C1U4	Aquaporin-1 (Fragment) OS=Homo sapiens OX=9606 GN=AQP1 PE=3 SV=1 - [A0A494C1U4_HUMAN]	14.71	4	1	1	2	46.44	14.71	1	1	47.16	14.71	1	1					136	15.0236	5.79541
	Sequence	# PSMs	# Proteins	# Protein Groups	Protein Group Accessions	Modifications	MH+ [Da]	q-Value	PEP	A2	IonScore A2	Exp Value A2	B2	IonScore B2	Exp Value B2	C2	IonScore C2	Exp Value C2	# Missed Cleavages
	VWTSGQVEEYDLDADDINSR	2	4	1	A0A494C1U4	S4(Phospho)	2392	0	0.007577	High	46.44	0.00183859	High	47.16	0.00154232				0
Q13509	Tubulin beta-3 chain OS=Homo sapiens OX=9606 GN=TUBB3 PE=1 SV=2 - [TBB3_HUMAN]	14.67	5	2	5	7		0							22.22	5.33	2	2	450	50.4003	4.93213
	Sequence	# PSMs	# Proteins	# Protein Groups	Protein Group Accessions	Modifications	MH+ [Da]	q-Value	PEP	A2	IonScore A2	Exp Value A2	B2	IonScore B2	Exp Value B2	C2	IonScore C2	Exp Value C2	# Missed Cleavages
	IMNTFSVVPSPK	1	5	1	Q5JP53		1319.7	0	3.936e-16	High	59.35	8.2579e-05							0
	NSSYFVEWIPNNVK	2	11	2	Q5JP53;Q13509		1696.84	0	5.463e-13	High	41.58	0.00676954				High	22.22	0.564403	0
	LAVNMVPFPR	2	11	2	Q5JP53;Q13509		1143.63	0	7.785e-09	High	41.52	0.00482715				High	16.89	1.35372	0
	AILVDLEPGTMDSVR	1	6	2	Q5JP53;Q13509		1615.84	0	1.514e-05	High	28.43	0.120366							0
	ALTVPELTQQMFDAK	1	4	1	Q13509		1691.87	0	3.936e-16	High	28.23	0.132502							0
P68363	Tubulin alpha-1B chain OS=Homo sapiens OX=9606 GN=TUBA1B PE=1 SV=1 - [TBA1B_HUMAN]	14.63	2	4	4	9	82.0237	14.63	4	5	20.9	2.88	1	1	29.28	11.31	3	3	451	50.1196	5.05908
	Sequence	# PSMs	# Proteins	# Protein Groups	Protein Group Accessions	Modifications	MH+ [Da]	q-Value	PEP	A2	IonScore A2	Exp Value A2	B2	IonScore B2	Exp Value B2	C2	IonScore C2	Exp Value C2	# Missed Cleavages
	AVFVDLEPTVIDEVR	1	1	1	P68363		1701.91	0	3.936e-16	High	50.47	0.00056897							0
	SIQFVDWCPTGFK	4	2	1	P68363	C8(Carbamidomethyl)	1584.75	0	3.936e-16	High	33.86	0.0354822	High	20.9	0.698221	High	23.32	0.404594	0
	TIGGGDDSFNTFFSETGAGK	2	1	1	P68363		2007.9	0	8.362e-09	High	27.33	0.176605				High	22.63	0.489272	0
	VGINYQPPTVVPGGDLAK	2	2	1	P68363		1824.99	0	1.542e-06	High	21.47	0.3272				High	17.33	0.994907	0
C9JZJ5	Melanoma-associated antigen 4 (Fragment) OS=Homo sapiens OX=9606 GN=MAGEA4 PE=1 SV=8 - [C9JZJ5_HUMAN]	14.62	5	1	1	1	23.17	14.62	1	1									171	18.5002	4.729
	Sequence	# PSMs	# Proteins	# Protein Groups	Protein Group Accessions	Modifications	MH+ [Da]	q-Value	PEP	A2	IonScore A2	Exp Value A2	B2	IonScore B2	Exp Value B2	C2	IonScore C2	Exp Value C2	# Missed Cleavages
	QPNEGSSSQEEEGPSTSPDAESLFR	1	5	1	C9JZJ5	S6(Phospho)	2745.12	0	7.19e-09	High	23.17	0.373269							0
Q9UQ35	Serine/arginine repetitive matrix protein 2 OS=Homo sapiens OX=9606 GN=SRRM2 PE=1 SV=2 - [SRRM2_HUMAN]	14.46	1	31	31	46	151.701	8.87	17	19	74.16	5.96	10	13	33.0867	6.87	12	14	2752	299.438	12.0591
	Sequence	# PSMs	# Proteins	# Protein Groups	Protein Group Accessions	Modifications	MH+ [Da]	q-Value	PEP	A2	IonScore A2	Exp Value A2	B2	IonScore B2	Exp Value B2	C2	IonScore C2	Exp Value C2	# Missed Cleavages
	HGGSPQPLATTPLSQEPVNPPSEASPTR	2	1	1	Q9UQ35	S4(Phospho); T27(Phospho)	3012.36	0	3.936e-16	High	34.13	0.0408197				High	14.93	3.26187	0
	SGSSQELDVKPSASPQER	2	1	1	Q9UQ35	S3(Phospho)	1981.89	0	0.0009097	High	30.6	0.075948							0
	SGTPPRQGSITSPQANEQSVTPQR	1	1	1	Q9UQ35	T3(Phospho); S9(Phospho)	2683.19	0	3.216e-05	High	13.66	4.46026							1
	THTTALAGRSPSPASGR	2	1	1	Q9UQ35	S10(Phospho); S12(Phospho)	1826.8	0	0.0009481				High	37.77	0.0119065	High	15.04	2.19487	1
	HASSSPESPKPAPAPGSHR	3	1	1	Q9UQ35	S3(Phospho); S4(Phospho); S5(Phospho); S8(Phospho)	2216.8	0	0.05046				High	18.7	0.368941	High	21.18	0.185185	0
	ARSRTPPSAPSQSR	1	1	1	Q9UQ35	S3(Phospho); T5(Phospho)	1657.71	0	0.001335							High	17.68	1.22667	2
	SSGHSSSELSPDAVEK	1	1	1	Q9UQ35	S10(Phospho)	1696.71	0.001	0.001827	High	40.15	0.00594604							0
	QGSITSPQANEQSVTPQRR	1	1	1	Q9UQ35	T15(Phospho)	2164.02	0.001	0.0009097	High	35.12	0.034237							1
	SCFESSPDPELK	1	1	1	Q9UQ35	C2(Carbamidomethyl); S6(Phospho)	1475.58	0.001	0.001827	High	34.5	0.0133765							0
	GRGPSPEGSSSTESSPEHPPK	1	1	1	Q9UQ35	S14(Phospho)	2186.94	0.001	0.001827	High	31.49	0.0599238							1
	GEGDAPFSEPGTTSTQRPSSPETATK	4	1	1	Q9UQ35	S20(Phospho)	2715.18	0.001	0.0009097	High	29.9	0.0979291	High	11.65	6.5382	High	10.04	9.25932	0
	RGEGDAPFSEPGTTSTQRPSSPETATK	1	1	1	Q9UQ35	S20(Phospho)	2871.29	0.001	0.001819	High	27.37	0.210075							1
	LPQSSSSESSPPSPQPTK	1	1	1	Q9UQ35	S13(Phospho)	1920.86	0.001	0.0009097	High	22.44	0.562752							0
	AQTPPGPSLSGSKSPCPQEK	1	1	1	Q9UQ35	T3(Phospho); S12(Phospho); C16(Carbamidomethyl)	2212.94	0.001	0.001827	High	16.84	1.60643							1
	ENSFGSPLEFR	1	1	1	Q9UQ35	S6(Phospho)	1362.57	0.001	0.01384	High	15.71	1.46486							0
	SRSGSSQELDVKPSASPQER	1	1	1	Q9UQ35	S3(Phospho); S5(Phospho)	2304.99	0.001	0.001973	High	12.76	4.48625							1
	SRSPLAIR	3	1	1	Q9UQ35	S1(Phospho); S3(Phospho)	1059.47	0.001	0.001335	High	12.48	3.07326				High	32.64	0.0272251	1
	SRTPPVTR	2	1	1	Q9UQ35	S1(Phospho); T3(Phospho)	1073.45	0.001	0.008271				High	23.63	0.185543	High	20.4	0.428645	1
	SRTPLLPR	1	1	1	Q9UQ35	S1(Phospho); T3(Phospho)	1099.5	0.001	0.004195							High	24.98	0.203002	1
	SATRPSPSPER	1	1	1	Q9UQ35	S6(Phospho); S8(Phospho)	1344.53	0.001	0.005298							High	20.56	0.301944	0
	SSSPVTELASR	1	1	1	Q9UQ35	S2(Phospho)	1213.55	0.002	0.08179				High	37.98	0.0101105				0
	GRGPSPEGSSSTESSPEHPPK	1	1	1	Q9UQ35	T12(Phospho); S14(Phospho)	2266.9	0.002	0.1057				High	24.42	0.21016				1
	HASSSPESPKPAPAPGSHR	1	1	1	Q9UQ35	S3(Phospho)	1976.9	0.002	0.1531				High	23.7	0.436604				0
	QSHSESPSLQSK	1	1	1	Q9UQ35	S6(Phospho)	1394.6	0.002	0.1342				High	23.07	0.276917				0
	SRTPPSAPSQSR	2	1	1	Q9UQ35	S1(Phospho)	1350.62	0.002	0.103				High	21	0.492881				1
	HASSSPESPKPAPAPGSHR	1	1	1	Q9UQ35	S3(Phospho); S5(Phospho); S8(Phospho)	2136.83	0.002	0.1193				High	15.98	1.263				0
	QGSITSPQANEQSVTPQR	1	1	1	Q9UQ35	S6(Phospho)	2007.92	0.002	0.06167				High	11.22	7.48296				0
	ELSNSPLRENSFGSPLEFR	1	1	1	Q9UQ35	S11(Phospho); S14(Phospho)	2339.01	0.003	0.01384	High	17.69	1.50215							1
	NHSGSRTPPVALNSSR	1	1	1	Q9UQ35	S5(Phospho); T7(Phospho)	1839.78	0.004	0.02265							High	18.19	1.02097	1
	GEFSASPMLK	1	1	1	Q9UQ35	S6(Phospho)	1146.49	0.005	0.01384	High	21.17	0.378481							0
	VKPETPPRQSHSGSISPYPK	1	1	1	Q9UQ35	T5(Phospho); S12(Phospho)	2352.08	0.005	0.01384	High	18.21	1.78793							1
	SLTRSPPAIR	1	1	1	Q9UQ35	S1(Phospho); T3(Phospho)	1257.57	0.006	0.05306							High	15.9	1.61935	1
	SSSPVTELASRSPIR	1	1	1	Q9UQ35	S3(Phospho); S12(Phospho)	1746.78	0.007	0.2195				High	19.91	0.886686				1
	SRTPPAIR	1	1	1	Q9UQ35	S1(Phospho); T3(Phospho)	1057.45	0.008	0.08279							High	16.03	1.2448	1
Q9NQG5	Regulation of nuclear pre-mRNA domain-containing protein 1B OS=Homo sapiens OX=9606 GN=RPRD1B PE=1 SV=1 - [RPR1B_HUMAN]	14.42	2	3	3	4	54.54	14.42	3	4									326	36.8772	5.97314
	Sequence	# PSMs	# Proteins	# Protein Groups	Protein Group Accessions	Modifications	MH+ [Da]	q-Value	PEP	A2	IonScore A2	Exp Value A2	B2	IonScore B2	Exp Value B2	C2	IonScore C2	Exp Value C2	# Missed Cleavages
	TFQQIQEEEDDDYPGSYSPQDPSAGPLLTEELIK	2	2	1	Q9NQG5	S18(Phospho)	3919.74	0	3.936e-16	High	54.54	0.000365974							0
	RTFQQIQEEEDDDYPGSYSPQDPSAGPLLTEELIK	1	2	1	Q9NQG5	S19(Phospho)	4075.84	0.001	0.008043	High	11.68	6.48639							1
	LSMEDSKSPPPK	1	1	1	Q9NQG5	S8(Phospho)	1395.62	0.009	0.08509	High	14.81	2.07637							1
P04004	Vitronectin OS=Homo sapiens OX=9606 GN=VTN PE=1 SV=1 - [VTNC_HUMAN]	14.23	1	5	5	9	105.92	10.88	4	5	28.95	3.35	1	1	29.21	8.79	3	3	478	54.2712	5.79541
	Sequence	# PSMs	# Proteins	# Protein Groups	Protein Group Accessions	Modifications	MH+ [Da]	q-Value	PEP	A2	IonScore A2	Exp Value A2	B2	IonScore B2	Exp Value B2	C2	IonScore C2	Exp Value C2	# Missed Cleavages
	FEDGVLDPDYPR	2	1	1	P04004		1422.66	0	3.936e-16	High	68.08	1.13741e-05				High	16.05	1.7146	0
	SIAQYWLGCPAPGHL	2	1	1	P04004	C9(Carbamidomethyl)	1669.82	0	3.936e-16	High	55.52	0.000267638				High	24.61	0.335215	0
	DVWGIEGPIDAAFTR	3	1	1	P04004		1646.81	0	0.0001286	High	20.81	0.712842				High	28.55	0.123509	0
	DWHGVPGQVDAAMAGR	1	1	1	P04004		1666.78	0	0.02447				High	28.95	0.115379				0
	GQYCYELDEK	1	1	1	P04004	C4(Carbamidomethyl)	1304.55	0.005	0.01384	High	22.67	0.242799							0
K7ERX7	ATP synthase subunit alpha, mitochondrial (Fragment) OS=Homo sapiens OX=9606 GN=ATP5F1A PE=1 SV=1 - [K7ERX7_HUMAN]	14.15	2	2	2	2	51.17	14.15	2	2									205	21.5767	9.68604
	Sequence	# PSMs	# Proteins	# Protein Groups	Protein Group Accessions	Modifications	MH+ [Da]	q-Value	PEP	A2	IonScore A2	Exp Value A2	B2	IonScore B2	Exp Value B2	C2	IonScore C2	Exp Value C2	# Missed Cleavages
	TGTAEMSSILEER	1	2	1	K7ERX7		1423.67	0	3.936e-16	High	51.07	0.000651878							0
	TGAIVDVPVGEELLGR	1	2	1	K7ERX7		1624.89	0.001	0.0009097	High	23.1	0.234359							0
C9JEN3	Protein lifeguard 3 (Fragment) OS=Homo sapiens OX=9606 GN=TMBIM1 PE=1 SV=1 - [C9JEN3_HUMAN]	14.15	8	2	2	2					46.5935	14.15	2	2					106	11.5274	6.52197
	Sequence	# PSMs	# Proteins	# Protein Groups	Protein Group Accessions	Modifications	MH+ [Da]	q-Value	PEP	A2	IonScore A2	Exp Value A2	B2	IonScore B2	Exp Value B2	C2	IonScore C2	Exp Value C2	# Missed Cleavages
	AVSDSFGPGEWDDR	1	8	1	C9JEN3	S5(Phospho)	1617.62	0	0.0356				High	43.64	0.00167599				0
	AVSDSFGPGEWDDRK	1	8	1	C9JEN3	S3(Phospho)	1745.72	0.002	0.07482				High	24.9	0.184772				1
H3BMI8	Telomeric repeat-binding factor 2-interacting protein 1 (Fragment) OS=Homo sapiens OX=9606 GN=TERF2IP PE=1 SV=1 - [H3BMI8_HUMAN]	14.14	3	1	1	1	30.05	14.14	1	1									99	10.8045	8.52881
	Sequence	# PSMs	# Proteins	# Protein Groups	Protein Group Accessions	Modifications	MH+ [Da]	q-Value	PEP	A2	IonScore A2	Exp Value A2	B2	IonScore B2	Exp Value B2	C2	IonScore C2	Exp Value C2	# Missed Cleavages
	YLLGDAPVSPSSQK	1	3	1	H3BMI8	S9(Phospho)	1541.73	0	1.278e-07	High	30.05	0.0878824							0
C9J9W2	LIM and SH3 domain protein 1 (Fragment) OS=Homo sapiens OX=9606 GN=LASP1 PE=1 SV=1 - [C9J9W2_HUMAN]	13.86	2	1	1	3	33.66	13.86	1	3						0			166	18.9683	9.01221
	Sequence	# PSMs	# Proteins	# Protein Groups	Protein Group Accessions	Modifications	MH+ [Da]	q-Value	PEP	A2	IonScore A2	Exp Value A2	B2	IonScore B2	Exp Value B2	C2	IonScore C2	Exp Value C2	# Missed Cleavages
	MGPSGGEGMEPERRDSQDGSSYR	2	2	1	C9J9W2	S21(Phospho)	2565.02	0.001	0.00124	High	34.89	0.0186009							2
	MGPSGGEGMEPERRDSQDGSSYR	1	2	1	C9J9W2	M9(Oxidation); S21(Phospho)	2581.01	0.001	0.001827	High	11.08	4.68678							2
K7EQH1	Uncharacterized protein C18orf25 (Fragment) OS=Homo sapiens OX=9606 GN=C18orf25 PE=1 SV=1 - [K7EQH1_HUMAN]	13.7	3	1	1	1	27.45	13.7	1	1									146	15.5022	4.43701
	Sequence	# PSMs	# Proteins	# Protein Groups	Protein Group Accessions	Modifications	MH+ [Da]	q-Value	PEP	A2	IonScore A2	Exp Value A2	B2	IonScore B2	Exp Value B2	C2	IonScore C2	Exp Value C2	# Missed Cleavages
	RDSSESQLASTESDKPTTGR	1	3	1	K7EQH1	S3(Phospho)	2231.98	0	3.741e-13	High	27.45	0.163697							1
P67809	Y-box-binding protein 1 OS=Homo sapiens OX=9606 GN=YBX1 PE=1 SV=3 - [YBOX1_HUMAN]	13.58	3	3	3	5					55.66	13.58	3	4	31.36	4.63	1	1	324	35.9027	9.87646
	Sequence	# PSMs	# Proteins	# Protein Groups	Protein Group Accessions	Modifications	MH+ [Da]	q-Value	PEP	A2	IonScore A2	Exp Value A2	B2	IonScore B2	Exp Value B2	C2	IonScore C2	Exp Value C2	# Missed Cleavages
	NEGSESAPEGQAQQR	2	3	1	P67809	S6(Phospho)	1667.67	0	0.01604				High	44.23	0.0018501	High	31.36	0.0339614	0
	NYQQNYQNSESGEK	1	3	1	P67809	S9(Phospho)	1768.68	0.002	0.0537				High	32.93	0.0197366				0
	NEGSESAPEGQAQQR	1	3	1	P67809		1587.7	0.002	0.08007				High	18.93	0.948661				0
	ENQGDETQGQQPPQR	1	2	1	P67809		1711.77	0.006	0.2059				High	12.14	5.63899				0
C9JKF7	Lymphocyte-specific protein 1 (Fragment) OS=Homo sapiens OX=9606 GN=LSP1 PE=1 SV=1 - [C9JKF7_HUMAN]	13.49	5	1	1	1	26.59	13.49	1	1									126	13.8904	4.22119
	Sequence	# PSMs	# Proteins	# Protein Groups	Protein Group Accessions	Modifications	MH+ [Da]	q-Value	PEP	A2	IonScore A2	Exp Value A2	B2	IonScore B2	Exp Value B2	C2	IonScore C2	Exp Value C2	# Missed Cleavages
	SPEGEQEDRPGLHAYEK	1	5	1	C9JKF7	S1(Phospho)	2021.86	0	1.035e-06	High	26.59	0.171916							0
H0YDU3	Torsin-1A-interacting protein 1 (Fragment) OS=Homo sapiens OX=9606 GN=TOR1AIP1 PE=1 SV=2 - [H0YDU3_HUMAN]	13.47	4	2	2	3	61.61	13.47	2	3									193	22.43	8.96826
	Sequence	# PSMs	# Proteins	# Protein Groups	Protein Group Accessions	Modifications	MH+ [Da]	q-Value	PEP	A2	IonScore A2	Exp Value A2	B2	IonScore B2	Exp Value B2	C2	IonScore C2	Exp Value C2	# Missed Cleavages
	GLRDSHSSEEDEASSQTDLSQTISK	1	4	1	H0YDU3	S7(Phospho); S8(Phospho)	2867.17	0	3.936e-16	High	44.73	0.00242793							1
	RGLRDSHSSEEDEASSQTDLSQTISK	1	4	1	H0YDU3	S6(Phospho); S8(Phospho); S9(Phospho)	3103.23	0	3.936e-16	High	32.88	0.0345203							2
	GLRDSHSSEEDEASSQTDLSQTISK	1	4	1	H0YDU3	S5(Phospho); S7(Phospho); S8(Phospho)	2947.13	0.001	0.0009097	High	26.08	0.119603							1
P0DP24	Calmodulin-2 OS=Homo sapiens OX=9606 GN=CALM2 PE=1 SV=1 - [CALM2_HUMAN]	13.42	9	2	2	2	35.74	5.37	1	1	33.65	8.05	1	1					149	16.8268	4.22119
	Sequence	# PSMs	# Proteins	# Protein Groups	Protein Group Accessions	Modifications	MH+ [Da]	q-Value	PEP	A2	IonScore A2	Exp Value A2	B2	IonScore B2	Exp Value B2	C2	IonScore C2	Exp Value C2	# Missed Cleavages
	EAFSLFDK	1	6	1	P0DP24		956.472	0.001	0.001827	High	35.74	0.0125609							0
	DGNGYISAAELR	1	5	1	P0DP24		1265.61	0.002	0.05328				High	33.65	0.0345647				0
Q15424	Scaffold attachment factor B1 OS=Homo sapiens OX=9606 GN=SAFB PE=1 SV=4 - [SAFB1_HUMAN]	13.33	2	5	5	5	22.63	7.87	2	2	41.9	5.46	3	3					915	102.58	5.46533
	Sequence	# PSMs	# Proteins	# Protein Groups	Protein Group Accessions	Modifications	MH+ [Da]	q-Value	PEP	A2	IonScore A2	Exp Value A2	B2	IonScore B2	Exp Value B2	C2	IonScore C2	Exp Value C2	# Missed Cleavages
	EESSELEQPFAQDTSSVGPDRK	1	2	1	Q15424	T14(Phospho)	2516.08	0	0.009844				High	28.83	0.129216				1
	ETINNLDTSSSDFTILQEIEEPSLEPENEK	1	1	1	Q15424	S10(Phospho)	3501.57	0.001	0.0009097	High	22.63	0.593239							0
	SEPVKEESSELEQPFAQDTSSVGPDRK	1	2	1	Q15424	S8(Phospho)	3056.38	0.002	0.0607				High	32.07	0.0610004				2
	TDCEPVGLEPAVEQSSAASELAEASSEELAEAPTEAPSPEAR	1	1	1	Q15424	C3(Carbamidomethyl); S38(Phospho)	4391.93	0.003	0.01384	High	12.58	5.46557							0
	ESSTSEGADQKMSSPEDDSDTKR	1	1	1	Q15424	S3(Phospho); T4(Phospho)	2646.98	0.004	0.1836				High	14.75	1.28292				2
E9PJR7	Plakophilin-3 (Fragment) OS=Homo sapiens OX=9606 GN=PKP3 PE=1 SV=1 - [E9PJR7_HUMAN]	13.33	5	1	1	1	23.54	13.33	1	1									120	12.8385	9.94971
	Sequence	# PSMs	# Proteins	# Protein Groups	Protein Group Accessions	Modifications	MH+ [Da]	q-Value	PEP	A2	IonScore A2	Exp Value A2	B2	IonScore B2	Exp Value B2	C2	IonScore C2	Exp Value C2	# Missed Cleavages
	AGGLDWPEATEVSPSR	1	5	1	E9PJR7	S13(Phospho)	1751.77	0	3.205e-05	High	23.54	0.347211							0
H7C559	Serine/threonine-protein phosphatase 4 regulatory subunit 2 (Fragment) OS=Homo sapiens OX=9606 GN=PPP4R2 PE=1 SV=1 - [H7C559_HUMAN]	13.29	3	1	1	1	0	13.29	1	1									143	15.6921	4.50049
	Sequence	# PSMs	# Proteins	# Protein Groups	Protein Group Accessions	Modifications	MH+ [Da]	q-Value	PEP	A2	IonScore A2	Exp Value A2	B2	IonScore B2	Exp Value B2	C2	IonScore C2	Exp Value C2	# Missed Cleavages
	NHSDSSTSESEVSSVSPLK	1	3	1	H7C559	S16(Phospho)	2056.87	0	4.269e-11	High	29.83	0.0857934							0
C9J542	PDZ and LIM domain protein 4 (Fragment) OS=Homo sapiens OX=9606 GN=PDLIM4 PE=1 SV=1 - [C9J542_HUMAN]	13.22	2	1	1	5	76.6667	13.22	1	3					58.41	13.22	1	2	121	12.9124	8.29443
	Sequence	# PSMs	# Proteins	# Protein Groups	Protein Group Accessions	Modifications	MH+ [Da]	q-Value	PEP	A2	IonScore A2	Exp Value A2	B2	IonScore B2	Exp Value B2	C2	IonScore C2	Exp Value C2	# Missed Cleavages
	IHIDPEIQDGSPTTSR	5	2	1	C9J542	S11(Phospho)	1845.84	0	3.936e-16	High	44.04	0.00395443				High	40.99	0.0076909	0
E9PLU6	LIM domain only protein 7 (Fragment) OS=Homo sapiens OX=9606 GN=LMO7 PE=1 SV=1 - [E9PLU6_HUMAN]	13.22	5	1	1	1	56.13	13.22	1	1									121	14.3392	9.42236
	Sequence	# PSMs	# Proteins	# Protein Groups	Protein Group Accessions	Modifications	MH+ [Da]	q-Value	PEP	A2	IonScore A2	Exp Value A2	B2	IonScore B2	Exp Value B2	C2	IonScore C2	Exp Value C2	# Missed Cleavages
	SWASPVYTEADGTFSR	1	5	1	E9PLU6	S1(Phospho)	1853.78	0	3.936e-16	High	56.13	0.000168209							0
A0A3B3IU16	BET1 homolog OS=Homo sapiens OX=9606 GN=BET1 PE=1 SV=1 - [A0A3B3IU16_HUMAN]	12.94	5	1	1	2	36.99	12.94	1	1					21.39	12.94	1	1	85	9.28668	7.12256
	Sequence	# PSMs	# Proteins	# Protein Groups	Protein Group Accessions	Modifications	MH+ [Da]	q-Value	PEP	A2	IonScore A2	Exp Value A2	B2	IonScore B2	Exp Value B2	C2	IonScore C2	Exp Value C2	# Missed Cleavages
	SLSIEIGHEVK	2	5	1	A0A3B3IU16	S3(Phospho)	1291.63	0.001	0.001827	High	36.99	0.014699				High	21.39	0.515898	0
Q08495	Dematin OS=Homo sapiens OX=9606 GN=DMTN PE=1 SV=3 - [DEMA_HUMAN]	12.84	2	4	4	9	103.31	10.62	3	4	46.44	6.91	2	2	79.4287	4.69	1	3	405	45.4862	8.88037
	Sequence	# PSMs	# Proteins	# Protein Groups	Protein Group Accessions	Modifications	MH+ [Da]	q-Value	PEP	A2	IonScore A2	Exp Value A2	B2	IonScore B2	Exp Value B2	C2	IonScore C2	Exp Value C2	# Missed Cleavages
	RGAEEEEEEEDDDSGEEMK	4	2	1	Q08495	S14(Phospho)	2292.8	0	3.936e-16	High	78.65	3.37734e-07				High	64.65	6.564e-06	1
	RGAEEEEEEEDDDSGEEMK	2	2	1	Q08495	S14(Phospho); M18(Oxidation)	2308.79	0	0.005671				High	46.44	0.000486886	High	21.01	0.154142	1
	HLSAEDFSR	1	1	1	Q08495	S3(Phospho)	1141.47	0.001	0.0009097	High	22.04	0.257571							0
	SSSLPAYGR	1	1	1	Q08495	S3(Phospho)	1017.44	0.002	0.1118				High	23.09	0.218699				0
	STSPPPSPEVWADSR	1	2	1	Q08495	S3(Phospho)	1692.73	0.005	0.01384	High	19.15	0.881127							0
Q9H6F5	Coiled-coil domain-containing protein 86 OS=Homo sapiens OX=9606 GN=CCDC86 PE=1 SV=1 - [CCD86_HUMAN]	12.78	2	2	2	3	71.37	12.78	2	2					45.59	6.39	1	1	360	40.2113	10.3306
	Sequence	# PSMs	# Proteins	# Protein Groups	Protein Group Accessions	Modifications	MH+ [Da]	q-Value	PEP	A2	IonScore A2	Exp Value A2	B2	IonScore B2	Exp Value B2	C2	IonScore C2	Exp Value C2	# Missed Cleavages
	ALVEFESNPEETREPGSPPSVQR	2	2	1	Q9H6F5	S17(Phospho)	2635.21	0	2.141e-05	High	46.58	0.0024693				High	45.59	0.00312635	1
	LQQGAGLESPQGQPEPGAASPQR	1	1	1	Q9H6F5	S20(Phospho)	2383.11	0	3.936e-16	High	42.29	0.00677551							0
Q5SSJ5	Heterochromatin protein 1-binding protein 3 OS=Homo sapiens OX=9606 GN=HP1BP3 PE=1 SV=1 - [HP1B3_HUMAN]	12.66	1	2	2	5	37.277	12.66	2	5									553	61.1693	9.67139
	Sequence	# PSMs	# Proteins	# Protein Groups	Protein Group Accessions	Modifications	MH+ [Da]	q-Value	PEP	A2	IonScore A2	Exp Value A2	B2	IonScore B2	Exp Value B2	C2	IonScore C2	Exp Value C2	# Missed Cleavages
	KEPDDSRDEDEDEDESSEEDSEDEEPPPK	1	1	1	Q5SSJ5	S17(Phospho)	3458.26	0	3.936e-16	High	38.95	0.00437448							2
	LAEGEEEKPEPDISSEESVSTVEEQENETPPATSSEAEQPK	2	1	1	Q5SSJ5	T29(Phospho)	4522.97	0	0.0009097	High	26.31	0.188276							0
	KEPDDSRDEDEDEDESSEEDSEDEEPPPK	1	1	1	Q5SSJ5	S16(Phospho); S17(Phospho); S21(Phospho)	3618.19	0.001	0.001827	High	16.93	0.275765							2
	KEPDDSRDEDEDEDESSEEDSEDEEPPPK	1	1	1	Q5SSJ5	S16(Phospho); S17(Phospho)	3538.22	0.005	0.01384	High	21.75	0.1594							2
A0A1W2PPR9	Zinc finger CCCH domain-containing protein 11A OS=Homo sapiens OX=9606 GN=ZC3H11A PE=1 SV=1 - [A0A1W2PPR9_HUMAN]	12.62	4	1	1	1	31.14	12.62	1	1									301	33.7936	6.62451
	Sequence	# PSMs	# Proteins	# Protein Groups	Protein Group Accessions	Modifications	MH+ [Da]	q-Value	PEP	A2	IonScore A2	Exp Value A2	B2	IonScore B2	Exp Value B2	C2	IonScore C2	Exp Value C2	# Missed Cleavages
	VESSENVPSPTHPPVVINAADDDEDDDDQFSEEGDETK	1	4	1	A0A1W2PPR9	S31(Phospho)	4208.72	0	3.936e-16	High	31.14	0.0528008							0
Q8NC51	Plasminogen activator inhibitor 1 RNA-binding protein OS=Homo sapiens OX=9606 GN=SERBP1 PE=1 SV=2 - [PAIRB_HUMAN]	12.5	1	2	2	9	120.59	12.5	2	7					21.75	4.41	1	2	408	44.9385	8.646
	Sequence	# PSMs	# Proteins	# Protein Groups	Protein Group Accessions	Modifications	MH+ [Da]	q-Value	PEP	A2	IonScore A2	Exp Value A2	B2	IonScore B2	Exp Value B2	C2	IonScore C2	Exp Value C2	# Missed Cleavages
	QISYNYSDLDQSNVTEETPEGEEHHPVADTENK	2	1	1	Q8NC51	S3(Phospho)	3855.62	0	2.182e-13	High	56.28	0.000176746							0
	SKSEEAHAEDSVMDHHFR	6	1	1	Q8NC51	S3(Phospho)	2191.89	0	3.936e-16	High	55.25	0.000180168				High	21.75	0.385634	1
	SKSEEAHAEDSVMDHHFR	1	1	1	Q8NC51	S3(Phospho); M13(Oxidation)	2207.88	0	1.122e-08	High	22.41	0.3327							1
Q9P0P8	Mitochondrial transcription rescue factor 1 OS=Homo sapiens OX=9606 GN=MTRES1 PE=1 SV=1 - [MRES1_HUMAN]	12.5	2	1	1	1	39.49	12.5	1	1									240	27.9238	9.29053
	Sequence	# PSMs	# Proteins	# Protein Groups	Protein Group Accessions	Modifications	MH+ [Da]	q-Value	PEP	A2	IonScore A2	Exp Value A2	B2	IonScore B2	Exp Value B2	C2	IonScore C2	Exp Value C2	# Missed Cleavages
	VDEEDSDEESHHDEMSEQEEELEDDPTVVK	1	2	1	Q9P0P8	S6(Phospho)	3610.37	0	3.936e-16	High	39.49	0.0056905							0
O00299	Chloride intracellular channel protein 1 OS=Homo sapiens OX=9606 GN=CLIC1 PE=1 SV=4 - [CLIC1_HUMAN]	12.45	1	2	2	2	0	7.47	1	1	30.66	4.98	1	1					241	26.9057	5.17334
	Sequence	# PSMs	# Proteins	# Protein Groups	Protein Group Accessions	Modifications	MH+ [Da]	q-Value	PEP	A2	IonScore A2	Exp Value A2	B2	IonScore B2	Exp Value B2	C2	IonScore C2	Exp Value C2	# Missed Cleavages
	LAALNPESNTAGLDIFAK	1	1	1	O00299		1844.98	0	1.58e-12	High	25.57	0.191498							0
	NSNPALNDNLEK	1	1	1	O00299		1328.64	0	0.02249				High	30.66	0.0722001				0
P10599	Thioredoxin OS=Homo sapiens OX=9606 GN=TXN PE=1 SV=3 - [THIO_HUMAN]	12.38	1	1	1	2	70.21	12.38	1	1					45.08	12.38	1	1	105	11.7297	4.91943
	Sequence	# PSMs	# Proteins	# Protein Groups	Protein Group Accessions	Modifications	MH+ [Da]	q-Value	PEP	A2	IonScore A2	Exp Value A2	B2	IonScore B2	Exp Value B2	C2	IonScore C2	Exp Value C2	# Missed Cleavages
	TAFQEALDAAGDK	2	1	1	P10599		1336.64	0	3.936e-16	High	70.21	7.56997e-06				High	45.08	0.00238585	0
P02100	Hemoglobin subunit epsilon OS=Homo sapiens OX=9606 GN=HBE1 PE=1 SV=2 - [HBE_HUMAN]	12.24	1	1	2	34	101.405	12.24	2	22		0				0			147	16.1925	8.63135
	Sequence	# PSMs	# Proteins	# Protein Groups	Protein Group Accessions	Modifications	MH+ [Da]	q-Value	PEP	A2	IonScore A2	Exp Value A2	B2	IonScore B2	Exp Value B2	C2	IonScore C2	Exp Value C2	# Missed Cleavages
	LLVVYPWTQR	33	7	3	P68871;P02042;P02100		1274.73	0	4.536e-07	High	43.52	0.00152953	High	21.14	0.265735	High	35.26	0.0128225	0
	LSELHCDK	1	1	1	P02100	C6(Carbamidomethyl)	1001.47	0	0.0009097	High	29	0.0582882							0
H0YE40	CD44 antigen (Fragment) OS=Homo sapiens OX=9606 GN=CD44 PE=1 SV=1 - [H0YE40_HUMAN]	12.2	4	1	1	1									33.37	12.2	1	1	82	9.09947	8.1626
	Sequence	# PSMs	# Proteins	# Protein Groups	Protein Group Accessions	Modifications	MH+ [Da]	q-Value	PEP	A2	IonScore A2	Exp Value A2	B2	IonScore B2	Exp Value B2	C2	IonScore C2	Exp Value C2	# Missed Cleavages
	SQEMVHLVNK	1	4	1	H0YE40	S1(Phospho)	1264.57	0	0.001335							High	33.37	0.0259355	0
B4DDC6	Prostaglandin E synthase 3 OS=Homo sapiens OX=9606 GN=PTGES3 PE=1 SV=1 - [B4DDC6_HUMAN]	12.1	3	1	1	6	99.6357	12.1	1	4					53.18	12.1	1	2	124	14.5635	4.31006
	Sequence	# PSMs	# Proteins	# Protein Groups	Protein Group Accessions	Modifications	MH+ [Da]	q-Value	PEP	A2	IonScore A2	Exp Value A2	B2	IonScore B2	Exp Value B2	C2	IonScore C2	Exp Value C2	# Missed Cleavages
	DWEDDSDEDMSNFDR	5	3	1	B4DDC6	S6(Phospho)	1955.63	0	3.936e-16	High	82.72	5.88021e-08				High	53.18	4.20734e-05	0
	DWEDDSDEDMSNFDR	1	3	1	B4DDC6	S6(Phospho); M10(Oxidation)	1971.63	0	3.936e-16	High	38.91	0.00127886							0
B1AKZ5	Astrocytic phosphoprotein PEA-15 OS=Homo sapiens OX=9606 GN=PEA15 PE=1 SV=1 - [B1AKZ5_HUMAN]	12.04	2	1	1	2	45.98	12.04	1	1					0	12.04	1	1	108	12.5226	5.17334
	Sequence	# PSMs	# Proteins	# Protein Groups	Protein Group Accessions	Modifications	MH+ [Da]	q-Value	PEP	A2	IonScore A2	Exp Value A2	B2	IonScore B2	Exp Value B2	C2	IonScore C2	Exp Value C2	# Missed Cleavages
	DIIRQPSEEEIIK	2	2	1	B1AKZ5	S7(Phospho)	1649.82	0	0.0009097	High	45.98	0.0024238				High	24.72	0.320423	1
A0A2R8YFC5	Thiamine transporter 2 OS=Homo sapiens OX=9606 GN=SLC19A3 PE=1 SV=1 - [A0A2R8YFC5_HUMAN]	11.89	3	1	1	1	25.07	11.89	1	1									286	31.8191	6.90283
	Sequence	# PSMs	# Proteins	# Protein Groups	Protein Group Accessions	Modifications	MH+ [Da]	q-Value	PEP	A2	IonScore A2	Exp Value A2	B2	IonScore B2	Exp Value B2	C2	IonScore C2	Exp Value C2	# Missed Cleavages
	SSSVNPVLEETHEGEAPGCEEQKPTSEILSTSGK	1	3	1	A0A2R8YFC5	S3(Phospho); C19(Carbamidomethyl)	3693.66	0.001	0.0009097	High	25.07	0.319262							0
H0YLQ6	Ceramide synthase 2 (Fragment) OS=Homo sapiens OX=9606 GN=CERS2 PE=1 SV=2 - [H0YLQ6_HUMAN]	11.84	2	1	1	1					22.16	11.84	1	1					228	26.7065	7.2251
	Sequence	# PSMs	# Proteins	# Protein Groups	Protein Group Accessions	Modifications	MH+ [Da]	q-Value	PEP	A2	IonScore A2	Exp Value A2	B2	IonScore B2	Exp Value B2	C2	IonScore C2	Exp Value C2	# Missed Cleavages
	LVEDERSDREETESSEGEEAAAGGGAK	1	2	1	H0YLQ6	S7(Phospho); T12(Phospho); S14(Phospho); S15(Phospho)	3128.11	0	0.01688				High	22.16	0.159331				2
Q9NZ63	Telomere length and silencing protein 1 homolog OS=Homo sapiens OX=9606 GN=C9orf78 PE=1 SV=1 - [TLS1_HUMAN]	11.76	1	2	2	2					43.3645	11.76	2	2					289	33.6671	6.7417
	Sequence	# PSMs	# Proteins	# Protein Groups	Protein Group Accessions	Modifications	MH+ [Da]	q-Value	PEP	A2	IonScore A2	Exp Value A2	B2	IonScore B2	Exp Value B2	C2	IonScore C2	Exp Value C2	# Missed Cleavages
	RRGDSESEEDEQDSEEVR	1	1	1	Q9NZ63	S5(Phospho); S7(Phospho)	2311.84	0	0.008854				High	43.34	0.00123045				2
	VGDTEKPEPERSPPNR	1	1	1	Q9NZ63	S12(Phospho)	1887.86	0.002	0.07158				High	24.65	0.325972				1
F8W079	ATP synthase subunit beta, mitochondrial (Fragment) OS=Homo sapiens OX=9606 GN=ATP5F1B PE=1 SV=1 - [F8W079_HUMAN]	11.62	3	3	3	3					66.56	11.62	3	3					284	30.151	8.29443
	Sequence	# PSMs	# Proteins	# Protein Groups	Protein Group Accessions	Modifications	MH+ [Da]	q-Value	PEP	A2	IonScore A2	Exp Value A2	B2	IonScore B2	Exp Value B2	C2	IonScore C2	Exp Value C2	# Missed Cleavages
	IMNVIGEPIDER	1	3	1	F8W079		1385.71	0.002	0.09801				High	52.44	0.000412799				0
	IGLFGGAGVGK	1	3	1	F8W079		975.562	0.002	0.08391				High	37.12	0.00806438				0
	VVDLLAPYAK	1	3	1	F8W079		1088.64	0.004	0.1925				High	16.11	0.802068				0
G3V3G7	Striatin-3 (Fragment) OS=Homo sapiens OX=9606 GN=STRN3 PE=1 SV=1 - [G3V3G7_HUMAN]	11.61	3	1	1	1					31.27	11.61	1	1					112	12.7785	6.11279
	Sequence	# PSMs	# Proteins	# Protein Groups	Protein Group Accessions	Modifications	MH+ [Da]	q-Value	PEP	A2	IonScore A2	Exp Value A2	B2	IonScore B2	Exp Value B2	C2	IonScore C2	Exp Value C2	# Missed Cleavages
	NLEQILNGGESPK	1	3	1	G3V3G7	S11(Phospho)	1478.69	0	0.02866				High	31.27	0.0557597				0
Q7Z6P5	DNA replication licensing factor MCM3 (Fragment) OS=Homo sapiens OX=9606 GN=MCM3 PE=1 SV=1 - [Q7Z6P5_HUMAN]	11.59	4	2	2	4	25.76	7.32	1	2	39.14	4.27	1	2					328	37.3845	6.32861
	Sequence	# PSMs	# Proteins	# Protein Groups	Protein Group Accessions	Modifications	MH+ [Da]	q-Value	PEP	A2	IonScore A2	Exp Value A2	B2	IonScore B2	Exp Value B2	C2	IonScore C2	Exp Value C2	# Missed Cleavages
	DGDSYDPYDFSDTEEEMPQVHTPK	1	4	1	Q7Z6P5	S11(Phospho)	2882.11	0.001	0.0009097	High	25.76	0.126625							0
	DGDSYDPYDFSDTEEEMPQVHTPK	1	4	1	Q7Z6P5	S11(Phospho); M17(Oxidation)	2898.1	0.001	0.001827	High	22.82	0.232205							0
	RSEDESETEDEEEK	2	4	1	Q7Z6P5	T8(Phospho)	1791.64	0.002	0.09642				High	30.47	0.0235575				1
P07737	Profilin-1 OS=Homo sapiens OX=9606 GN=PFN1 PE=1 SV=2 - [PROF1_HUMAN]	11.43	2	1	1	1	0	11.43	1	1									140	15.0446	8.26514
	Sequence	# PSMs	# Proteins	# Protein Groups	Protein Group Accessions	Modifications	MH+ [Da]	q-Value	PEP	A2	IonScore A2	Exp Value A2	B2	IonScore B2	Exp Value B2	C2	IonScore C2	Exp Value C2	# Missed Cleavages
	TFVNITPAEVGVLVGK	1	2	1	P07737		1643.94	0.001	0.001827	High	21.64	0.19605							0
H7BZJ3	Protein disulfide-isomerase A3 (Fragment) OS=Homo sapiens OX=9606 GN=PDIA3 PE=1 SV=1 - [H7BZJ3_HUMAN]	11.38	1	1	1	2	87.44	11.38	1	1					30.03	11.38	1	1	123	13.5108	7.29834
	Sequence	# PSMs	# Proteins	# Protein Groups	Protein Group Accessions	Modifications	MH+ [Da]	q-Value	PEP	A2	IonScore A2	Exp Value A2	B2	IonScore B2	Exp Value B2	C2	IonScore C2	Exp Value C2	# Missed Cleavages
	SDVLELTDDNFESR	2	1	1	H7BZJ3		1639.75	0	3.936e-16	High	87.44	1.46675e-07				High	30.03	0.0789527	0
O75379	Vesicle-associated membrane protein 4 OS=Homo sapiens OX=9606 GN=VAMP4 PE=1 SV=2 - [VAMP4_HUMAN]	11.35	1	1	1	3	36.4209	11.35	1	2					22.94	11.35	1	1	141	16.3865	7.34229
	Sequence	# PSMs	# Proteins	# Protein Groups	Protein Group Accessions	Modifications	MH+ [Da]	q-Value	PEP	A2	IonScore A2	Exp Value A2	B2	IonScore B2	Exp Value B2	C2	IonScore C2	Exp Value C2	# Missed Cleavages
	NLLEDDSDEEEDFFLR	3	1	1	O75379	S7(Phospho)	2065.83	0	9.52e-08	High	35.74	0.014481				High	22.94	0.259415	0
A0A075B7F2	TATA-binding protein-associated factor 2N (Fragment) OS=Homo sapiens OX=9606 GN=TAF15 PE=1 SV=1 - [A0A075B7F2_HUMAN]	11.3	2	1	1	1	36.58	11.3	1	1									239	26.1429	4.81787
	Sequence	# PSMs	# Proteins	# Protein Groups	Protein Group Accessions	Modifications	MH+ [Da]	q-Value	PEP	A2	IonScore A2	Exp Value A2	B2	IonScore B2	Exp Value B2	C2	IonScore C2	Exp Value C2	# Missed Cleavages
	QSSYSQQPYNNQGQQQNMESSGSQGGR	1	2	1	A0A075B7F2		2975.26	0	2.292e-12	High	36.58	0.0186379							0
O95674	Phosphatidate cytidylyltransferase 2 OS=Homo sapiens OX=9606 GN=CDS2 PE=1 SV=1 - [CDS2_HUMAN]	11.24	1	2	2	2	41.09	11.24	2	2									445	51.3841	7.09326
	Sequence	# PSMs	# Proteins	# Protein Groups	Protein Group Accessions	Modifications	MH+ [Da]	q-Value	PEP	A2	IonScore A2	Exp Value A2	B2	IonScore B2	Exp Value B2	C2	IonScore C2	Exp Value C2	# Missed Cleavages
	VDGETASDSESRAESAPLPVSADDTPEVLNR	1	1	1	O95674	S15(Phospho)	3294.47	0	3.936e-16	High	34.96	0.0325218							1
	VAHEPVAPPEDKESESEAK	1	1	1	O95674	S14(Phospho)	2128.95	0	8.908e-11	High	25.63	0.268467							1
U3KPS2	Myeloblastin OS=Homo sapiens OX=9606 GN=PRTN3 PE=1 SV=1 - [U3KPS2_HUMAN]	11.16	2	1	1	1					22.29	11.16	1	1					215	23.596	8.1626
	Sequence	# PSMs	# Proteins	# Protein Groups	Protein Group Accessions	Modifications	MH+ [Da]	q-Value	PEP	A2	IonScore A2	Exp Value A2	B2	IonScore B2	Exp Value B2	C2	IonScore C2	Exp Value C2	# Missed Cleavages
	TQEPTQQHFSVAQVFLNNYDAENK	1	2	1	U3KPS2		2808.32	0.002	0.0891				High	22.29	0.663091				0
O60218	Aldo-keto reductase family 1 member B10 OS=Homo sapiens OX=9606 GN=AKR1B10 PE=1 SV=2 - [AK1BA_HUMAN]	11.08	1	3	3	4	102.715	11.08	3	3					24.75	3.16	1	1	316	35.9968	7.84033
	Sequence	# PSMs	# Proteins	# Protein Groups	Protein Group Accessions	Modifications	MH+ [Da]	q-Value	PEP	A2	IonScore A2	Exp Value A2	B2	IonScore B2	Exp Value B2	C2	IonScore C2	Exp Value C2	# Missed Cleavages
	IVENIQVFDFK	1	1	1	O60218		1351.73	0	3.936e-16	High	64.18	2.44444e-05							0
	LSDEEMATILSFNR	1	1	1	O60218		1625.79	0	3.936e-16	High	58	0.000139708							0
	MPIVGLGTWK	2	1	1	O60218		1101.61	0	7.749e-12	High	29.25	0.0673881				High	24.75	0.202822	0
F2Z3H0	DnaJ homolog subfamily C member 2 OS=Homo sapiens OX=9606 GN=DNAJC2 PE=1 SV=1 - [F2Z3H0_HUMAN]	11.02	4	1	1	1	42.15	11.02	1	1									118	13.494	7.43018
	Sequence	# PSMs	# Proteins	# Protein Groups	Protein Group Accessions	Modifications	MH+ [Da]	q-Value	PEP	A2	IonScore A2	Exp Value A2	B2	IonScore B2	Exp Value B2	C2	IonScore C2	Exp Value C2	# Missed Cleavages
	NASASFQELEDKK	1	4	1	F2Z3H0	S3(Phospho)	1546.68	0.001	0.0009097	High	42.15	0.00410828							1
P04083	Annexin A1 OS=Homo sapiens OX=9606 GN=ANXA1 PE=1 SV=2 - [ANXA1_HUMAN]	10.98	3	3	3	3	0	3.76	1	1	42.27	7.23	2	2					346	38.69	7.02002
	Sequence	# PSMs	# Proteins	# Protein Groups	Protein Group Accessions	Modifications	MH+ [Da]	q-Value	PEP	A2	IonScore A2	Exp Value A2	B2	IonScore B2	Exp Value B2	C2	IonScore C2	Exp Value C2	# Missed Cleavages
	GVDEATIIDILTK	1	3	1	P04083		1387.77	0	0.0005278	High	27.25	0.100775							0
	TPAQFDADELR	1	2	1	P04083		1262.6	0	0.03647				High	42.27	0.00449734				0
	GTDVNVFNTILTTR	1	1	1	P04083		1550.82	0.002	0.07243				High	13.91	3.01581				0
H0YEV2	Src substrate cortactin (Fragment) OS=Homo sapiens OX=9606 GN=CTTN PE=1 SV=1 - [H0YEV2_HUMAN]	10.94	3	1	1	2	35.34	10.94	1	1	36.58	10.94	1	1					128	14.302	5.35107
	Sequence	# PSMs	# Proteins	# Protein Groups	Protein Group Accessions	Modifications	MH+ [Da]	q-Value	PEP	A2	IonScore A2	Exp Value A2	B2	IonScore B2	Exp Value B2	C2	IonScore C2	Exp Value C2	# Missed Cleavages
	LPSSPVYEDAASFK	2	3	1	H0YEV2	S4(Phospho)	1590.71	0	2.592e-11	High	35.34	0.0222528	High	36.58	0.0167807				0
Q9Y5S9	RNA-binding protein 8A OS=Homo sapiens OX=9606 GN=RBM8A PE=1 SV=1 - [RBM8A_HUMAN]	10.92	1	1	1	1	48.68	10.92	1	1									174	19.8767	5.71924
	Sequence	# PSMs	# Proteins	# Protein Groups	Protein Group Accessions	Modifications	MH+ [Da]	q-Value	PEP	A2	IonScore A2	Exp Value A2	B2	IonScore B2	Exp Value B2	C2	IonScore C2	Exp Value C2	# Missed Cleavages
	MREDYDSVEQDGDEPGPQR	1	1	1	Q9Y5S9	S7(Phospho)	2302.89	0	8.722e-13	High	48.68	0.000690469							1
P13861	cAMP-dependent protein kinase type II-alpha regulatory subunit OS=Homo sapiens OX=9606 GN=PRKAR2A PE=1 SV=2 - [KAP2_HUMAN]	10.89	1	2	2	6	100.77	10.89	2	4					55.14	5.69	1	2	404	45.49	5.07178
	Sequence	# PSMs	# Proteins	# Protein Groups	Protein Group Accessions	Modifications	MH+ [Da]	q-Value	PEP	A2	IonScore A2	Exp Value A2	B2	IonScore B2	Exp Value B2	C2	IonScore C2	Exp Value C2	# Missed Cleavages
	VADAKGDSESEEDEDLEVPVPSR	4	1	1	P13861	S8(Phospho); S10(Phospho)	2633.06	0	3.936e-16	High	57.56	0.000104005				High	55.14	0.000170398	1
	RVSVCAETYNPDEEEEDTDPR	2	1	1	P13861	S3(Phospho); C5(Carbamidomethyl)	2591.03	0	1.042e-11	High	46.95	0.00120597							1
Q92769	Histone deacetylase 2 OS=Homo sapiens OX=9606 GN=HDAC2 PE=1 SV=2 - [HDAC2_HUMAN]	10.86	1	4	4	11	63.36	10.86	4	10	24.08	3.89	1	1					488	55.3288	5.90967
	Sequence	# PSMs	# Proteins	# Protein Groups	Protein Group Accessions	Modifications	MH+ [Da]	q-Value	PEP	A2	IonScore A2	Exp Value A2	B2	IonScore B2	Exp Value B2	C2	IonScore C2	Exp Value C2	# Missed Cleavages
	MLPHAPGVQMQAIPEDAVHEDSGDEDGEDPDKR	3	1	1	Q92769	S22(Phospho)	3665.56	0	3.936e-16	High	32.75	0.0503013							1
	MLPHAPGVQMQAIPEDAVHEDSGDEDGEDPDKR	2	1	1	Q92769	M1(Oxidation); S22(Phospho)	3681.55	0	6.23e-08	High	28.95	0.117162							1
	MLPHAPGVQMQAIPEDAVHEDSGDEDGEDPDKR	1	1	1	Q92769	M1(Oxidation); M10(Oxidation); S22(Phospho)	3697.55	0	0.0005745	High	16.09	2.04457							1
	IACDEEFSDSEDEGEGGRR	2	1	1	Q92769	C3(Carbamidomethyl); S8(Phospho); S10(Phospho)	2317.8	0.001	0.001827	High	29.29	0.0269083							1
	RIACDEEFSDSEDEGEGGRR	1	1	1	Q92769	C4(Carbamidomethyl); S9(Phospho); S11(Phospho)	2473.9	0.001	0.001827	High	27.56	0.0557734							2
	MLPHAPGVQMQAIPEDAVHEDSGDEDGEDPDK	1	1	1	Q92769	S22(Phospho)	3509.46	0.001	0.001827	High	11.47	5.92737							0
	IACDEEFSDSEDEGEGGRR	1	1	1	Q92769	C3(Carbamidomethyl); S8(Phospho)	2237.83	0.002	0.05432				High	24.08	0.153991				1
E9PKE3	Heat shock cognate 71 kDa protein OS=Homo sapiens OX=9606 GN=HSPA8 PE=1 SV=1 - [E9PKE3_HUMAN]	10.85	9	2	5	10	142.273	8.93	4	6	29.67	1.91	1	1	60.9967	4.31	2	3	627	68.7632	5.51611
	Sequence	# PSMs	# Proteins	# Protein Groups	Protein Group Accessions	Modifications	MH+ [Da]	q-Value	PEP	A2	IonScore A2	Exp Value A2	B2	IonScore B2	Exp Value B2	C2	IonScore C2	Exp Value C2	# Missed Cleavages
	IINEPTAAAIAYGLDK	2	9	2	P11021;E9PKE3		1659.9	0	3.936e-16	High	94.37	1.92851e-08				High	21.28	0.446839	0
	VEIIANDQGNR	4	13	3	P11021;E9PKE3;P0DMV9		1228.62	0	9.392e-09	High	41.78	0.00505108				High	47.21	0.00147999	0
	TTPSYVAFTDTER	1	12	2	P0DMV9;E9PKE3		1487.7	0	1.234e-07	High	36.77	0.0169775							0
	STAGDTHLGGEDFDNR	2	4	1	E9PKE3		1691.73	0	3.936e-16	High	30.31	0.069321							0
	DAGTIAGLNVLR	1	8	1	E9PKE3		1199.68	0	0.04997				High	29.67	0.0574				0
P07900	Heat shock protein HSP 90-alpha OS=Homo sapiens OX=9606 GN=HSP90AA1 PE=1 SV=5 - [HS90A_HUMAN]	10.79	1	7	10	47	205.925	6.69	5	20	180.255	6.83	6	10	235.288	6.83	6	17	732	84.6067	5.021
	Sequence	# PSMs	# Proteins	# Protein Groups	Protein Group Accessions	Modifications	MH+ [Da]	q-Value	PEP	A2	IonScore A2	Exp Value A2	B2	IonScore B2	Exp Value B2	C2	IonScore C2	Exp Value C2	# Missed Cleavages
	ESEDKPEIEDVGSDEEEEKK	17	1	1	P07900	S13(Phospho)	2400.98	0	4.175e-16	High	54.31	0.000268558	High	10.02	7.13208	High	37.13	0.0131289	1
	ESEDKPEIEDVGSDEEEEK	9	1	1	P07900	S13(Phospho)	2272.88	0	8.265e-11	High	38.68	0.00689791				High	42.72	0.00244029	0
	TLTIVDTGIGMTK	1	1	2	P07900;P08238		1349.74	0	3.797e-14	High	36.71	0.0111665							0
	ERDKEVSDDEAEEK	5	1	1	P07900	S7(Phospho)	1758.71	0	0.02395				High	64.62	1.68258e-05	High	26.75	0.0975375	2
	DKEVSDDEAEEK	7	1	1	P07900	S5(Phospho)	1473.56	0	0.006208				High	57.74	6.5456e-05	High	58.42	5.01421e-05	1
	ADLINNLGTIAK	2	2	2	P07900;P08238		1242.71	0.001	0.0009097	High	39.47	0.00492026				High	20.11	0.495295	0
	ESEDKPEIEDVGSDEEEEKKDGDK	2	1	1	P07900	S13(Phospho)	2816.14	0.001	0.001335	High	14.38	2.8159				High	25.7	0.187735	2
	EVSDDEAEEKEDKEEEK	1	1	1	P07900	S3(Phospho)	2117.83	0.002	0.131				High	34.76	0.0168601				2
	DKEVSDDEAEEKEDK	2	1	1	P07900	S5(Phospho)	1845.73	0.002	0.08032				High	32.17	0.0346143				2
	YIDQEELNK	1	2	2	P07900;P08238		1151.56	0.002	0.06747				High	23.3	0.317826				0
Q13547	Histone deacetylase 1 OS=Homo sapiens OX=9606 GN=HDAC1 PE=1 SV=1 - [HDAC1_HUMAN]	10.79	1	3	3	9	73.4	10.79	3	6					0	10.79	2	3	482	55.0677	5.47803
	Sequence	# PSMs	# Proteins	# Protein Groups	Protein Group Accessions	Modifications	MH+ [Da]	q-Value	PEP	A2	IonScore A2	Exp Value A2	B2	IonScore B2	Exp Value B2	C2	IonScore C2	Exp Value C2	# Missed Cleavages
	MLPHAPGVQMQAIPEDAIPEESGDEDEDDPDKR	3	1	1	Q13547	S22(Phospho)	3711.59	0	3.936e-16	High	46.15	0.00220336				High	15.43	2.50186	1
	IACEEEFSDSEEEGEGGRK	3	1	1	Q13547	C3(Carbamidomethyl); S8(Phospho); S10(Phospho)	2317.83	0	3.936e-16	High	45.75	0.000812852				High	25.85	0.0681242	1
	MLPHAPGVQMQAIPEDAIPEESGDEDEDDPDKR	2	1	1	Q13547	M1(Oxidation); S22(Phospho)	3727.58	0	5.592e-08	High	21.8	0.568527							1
	MLPHAPGVQMQAIPEDAIPEESGDEDEDDPDK	1	1	1	Q13547	S22(Phospho)	3555.49	0.001	0.0009097	High	13.09	4.28563							0
J3QL05	Serine/arginine-rich splicing factor 2 (Fragment) OS=Homo sapiens OX=9606 GN=SRSF2 PE=1 SV=1 - [J3QL05_HUMAN]	10.77	3	1	1	1					30.5	10.77	1	1					130	15.1466	10.9604
	Sequence	# PSMs	# Proteins	# Protein Groups	Protein Group Accessions	Modifications	MH+ [Da]	q-Value	PEP	A2	IonScore A2	Exp Value A2	B2	IonScore B2	Exp Value B2	C2	IonScore C2	Exp Value C2	# Missed Cleavages
	VDNLTYRTSPDTLR	1	3	1	J3QL05	S9(Phospho)	1730.81	0.002	0.1133				High	30.5	0.0775388				1
J3QSX6	Actin-binding LIM protein 1 OS=Homo sapiens OX=9606 GN=ABLIM1 PE=1 SV=2 - [J3QSX6_HUMAN]	10.72	9	3	3	3	32.81	3.74	1	1	49.31	6.98	2	2					401	46.0421	8.39697
	Sequence	# PSMs	# Proteins	# Protein Groups	Protein Group Accessions	Modifications	MH+ [Da]	q-Value	PEP	A2	IonScore A2	Exp Value A2	B2	IonScore B2	Exp Value B2	C2	IonScore C2	Exp Value C2	# Missed Cleavages
	TLSPTPSAEGYQDVR	1	9	1	J3QSX6	S3(Phospho)	1700.76	0	2.169e-10	High	32.81	0.0403696							0
	STSQGSINSPVYSR	1	9	1	J3QSX6	S3(Phospho)	1562.69	0	0.02457				High	49.31	0.000870355				0
	RSSGREEDDEELLR	1	7	1	J3QSX6	S3(Phospho)	1770.77	0.002	0.1087				High	23.77	0.319227				2
Q13501	Sequestosome-1 OS=Homo sapiens OX=9606 GN=SQSTM1 PE=1 SV=1 - [SQSTM_HUMAN]	10.68	2	2	2	4	35.08	7.05	1	2	32.34	10.68	2	2					440	47.6569	5.22412
	Sequence	# PSMs	# Proteins	# Protein Groups	Protein Group Accessions	Modifications	MH+ [Da]	q-Value	PEP	A2	IonScore A2	Exp Value A2	B2	IonScore B2	Exp Value B2	C2	IonScore C2	Exp Value C2	# Missed Cleavages
	IALESEGRPEEQMESDNCSGGDDDWTHLSSK	2	1	1	Q13501	C18(Carbamidomethyl); S19(Phospho)	3559.43	0	3.936e-16	High	33	0.0345067	High	13.66	2.97063				0
	IALESEGRPEEQMESDNCSGGDDDWTHLSSK	1	1	1	Q13501	S15(Phospho); C18(Carbamidomethyl); S19(Phospho)	3639.39	0	0.0009097	High	23.08	0.239131							0
	SRLTPVSPESSSTEEK	1	2	1	Q13501	T4(Phospho); S7(Phospho)	1893.79	0.002	0.07035				High	32.34	0.037603				1
A0A0A0MR39	Myelin expression factor 2 OS=Homo sapiens OX=9606 GN=MYEF2 PE=1 SV=1 - [A0A0A0MR39_HUMAN]	10.67	4	2	2	4	39.46	10.67	2	3					37.37	4	1	1	600	64.1086	8.86572
	Sequence	# PSMs	# Proteins	# Protein Groups	Protein Group Accessions	Modifications	MH+ [Da]	q-Value	PEP	A2	IonScore A2	Exp Value A2	B2	IonScore B2	Exp Value B2	C2	IonScore C2	Exp Value C2	# Missed Cleavages
	AEVPGATGGDSPHLQPAEPPGEPR	3	4	1	A0A0A0MR39	S11(Phospho)	2446.09	0	1.536e-09	High	34.07	0.0396835				High	37.37	0.0182682	0
	IGSSNMGPVGSGISGGMGSMNSVTGGMGMGLDRMSSSFDR	1	2	1	A0A0A0MR39	S11(Phospho); S14(Phospho); M20(Oxidation); M27(Oxidation); M29(Oxidation)	4076.6	0.006	0.03417	High	12.51	3.36348							1
A0A0U1RRK2	FACT complex subunit SSRP1 (Fragment) OS=Homo sapiens OX=9606 GN=SSRP1 PE=1 SV=1 - [A0A0U1RRK2_HUMAN]	10.67	2	1	1	6	115.14	10.67	1	3		0			46.7	10.67	1	3	225	25.8726	5.77002
	Sequence	# PSMs	# Proteins	# Protein Groups	Protein Group Accessions	Modifications	MH+ [Da]	q-Value	PEP	A2	IonScore A2	Exp Value A2	B2	IonScore B2	Exp Value B2	C2	IonScore C2	Exp Value C2	# Missed Cleavages
	EGMNPSYDEYADSDEDQHDAYLER	4	2	1	A0A0U1RRK2	S13(Phospho)	2929.08	0	3.936e-16	High	59.61	4.33754e-05				High	36.82	0.00829799	0
	EGMNPSYDEYADSDEDQHDAYLER	2	2	1	A0A0U1RRK2	M3(Oxidation); S13(Phospho)	2945.08	0	3.936e-16	High	48.22	0.000533339				High	27.49	0.0580164	0
A0A494C0B4	UV excision repair protein RAD23 homolog A OS=Homo sapiens OX=9606 GN=RAD23A PE=1 SV=1 - [A0A494C0B4_HUMAN]	10.64	2	1	1	2	52.98	10.64	1	2									282	30.4662	4.84326
	Sequence	# PSMs	# Proteins	# Protein Groups	Protein Group Accessions	Modifications	MH+ [Da]	q-Value	PEP	A2	IonScore A2	Exp Value A2	B2	IonScore B2	Exp Value B2	C2	IonScore C2	Exp Value C2	# Missed Cleavages
	EDKSPSEESAPTTSPESVSGSVPSSGSSGR	2	2	1	A0A494C0B4	S4(Phospho)	3002.28	0	3.936e-16	High	40.82	0.00692574							1
H0Y710	Large proline-rich protein BAG6 (Fragment) OS=Homo sapiens OX=9606 GN=BAG6 PE=1 SV=1 - [H0Y710_HUMAN]	10.62	5	1	1	2					25.09	10.62	1	2					226	24.8214	5.71924
	Sequence	# PSMs	# Proteins	# Protein Groups	Protein Group Accessions	Modifications	MH+ [Da]	q-Value	PEP	A2	IonScore A2	Exp Value A2	B2	IonScore B2	Exp Value B2	C2	IonScore C2	Exp Value C2	# Missed Cleavages
	ASPEPQRENASPAPGTTAEEAMSR	2	5	1	H0Y710	T16(Phospho)	2564.11	0.002	0.1122				High	25.09	0.284188				1
A2A3M4	Cingulin (Fragment) OS=Homo sapiens OX=9606 GN=CGN PE=1 SV=1 - [A2A3M4_HUMAN]	10.59	3	1	1	2	67.37	10.59	1	2									170	17.6018	6.56592
	Sequence	# PSMs	# Proteins	# Protein Groups	Protein Group Accessions	Modifications	MH+ [Da]	q-Value	PEP	A2	IonScore A2	Exp Value A2	B2	IonScore B2	Exp Value B2	C2	IonScore C2	Exp Value C2	# Missed Cleavages
	SHSQASLAGPGPVDPSNR	2	3	1	A2A3M4	S3(Phospho)	1856.83	0	3.936e-16	High	51.57	0.000631492							0
Q9UKM9	RNA-binding protein Raly OS=Homo sapiens OX=9606 GN=RALY PE=1 SV=1 - [RALY_HUMAN]	10.46	1	1	1	4	59.35	10.46	1	4									306	32.4436	9.17334
	Sequence	# PSMs	# Proteins	# Protein Groups	Protein Group Accessions	Modifications	MH+ [Da]	q-Value	PEP	A2	IonScore A2	Exp Value A2	B2	IonScore B2	Exp Value B2	C2	IonScore C2	Exp Value C2	# Missed Cleavages
	TRDDGDEEGLLTHSEEELEHSQDTDADDGALQ	3	1	1	Q9UKM9	T24(Phospho)	3607.45	0	4.269e-11	High	45.98	0.00169956							1
	TRDDGDEEGLLTHSEEELEHSQDTDADDGALQ	1	1	1	Q9UKM9	T12(Phospho); S14(Phospho)	3687.42	0.001	0.001827	High	18.07	0.764181							1
H3BUM4	Dynein light intermediate chain (Fragment) OS=Homo sapiens OX=9606 GN=DYNC1LI2 PE=1 SV=1 - [H3BUM4_HUMAN]	10.22	3	1	1	1	20.37	10.22	1	1									186	20.5223	5.33838
	Sequence	# PSMs	# Proteins	# Protein Groups	Protein Group Accessions	Modifications	MH+ [Da]	q-Value	PEP	A2	IonScore A2	Exp Value A2	B2	IonScore B2	Exp Value B2	C2	IonScore C2	Exp Value C2	# Missed Cleavages
	DFQDYMEPEEGCQGSPQRR	1	3	1	H3BUM4	C12(Carbamidomethyl); S15(Phospho)	2408.93	0.001	0.001827	High	20.37	0.471564							1
P14625	Endoplasmin OS=Homo sapiens OX=9606 GN=HSP90B1 PE=1 SV=1 - [ENPL_HUMAN]	10.21	2	5	6	7	132.71	8.84	5	6	40.85	1.37	1	1					803	92.4113	4.84326
	Sequence	# PSMs	# Proteins	# Protein Groups	Protein Group Accessions	Modifications	MH+ [Da]	q-Value	PEP	A2	IonScore A2	Exp Value A2	B2	IonScore B2	Exp Value B2	C2	IonScore C2	Exp Value C2	# Missed Cleavages
	ELISNASDALDK	1	2	2	P08238;P14625		1275.64	0	3.936e-16	High	66.49	1.66496e-05							0
	EEKEESDDEAAVEEEEEEK	1	1	1	P14625	S6(Phospho)	2332.88	0	2.864e-15	High	56.93	9.79371e-05							1
	GVVDSDDLPLNVSR	1	1	1	P14625		1485.76	0	3.936e-16	High	45.13	0.00251046							0
	TETVEEPMEEEEAAKEEKEESDDEAAVEEEEEEK	2	1	1	P14625	S21(Phospho)	4035.6	0	3.936e-16	High	26.41	0.148107							2
	DISTNYYASQK	1	2	1	P14625		1289.6	0	0.0342				High	40.85	0.00578037				0
	SILFVPTSAPR	1	1	1	P14625		1187.68	0.008	0.08509	High	20.06	0.495112							0
F8W038	Chromosome 17 open reading frame 49 OS=Homo sapiens OX=9606 GN=C17orf49 PE=1 SV=1 - [F8W038_HUMAN]	10.19	4	1	1	1	33.49	10.19	1	1									157	16.2795	8.76318
	Sequence	# PSMs	# Proteins	# Protein Groups	Protein Group Accessions	Modifications	MH+ [Da]	q-Value	PEP	A2	IonScore A2	Exp Value A2	B2	IonScore B2	Exp Value B2	C2	IonScore C2	Exp Value C2	# Missed Cleavages
	VYEDSGIPLPAESPKK	1	4	1	F8W038	S13(Phospho)	1809.87	0	2.579e-11	High	33.49	0.0417493							1
P60174	Triosephosphate isomerase OS=Homo sapiens OX=9606 GN=TPI1 PE=1 SV=3 - [TPIS_HUMAN]	10.14	1	2	2	2					53.05	10.14	2	2					286	30.7717	5.92236
	Sequence	# PSMs	# Proteins	# Protein Groups	Protein Group Accessions	Modifications	MH+ [Da]	q-Value	PEP	A2	IonScore A2	Exp Value A2	B2	IonScore B2	Exp Value B2	C2	IonScore C2	Exp Value C2	# Missed Cleavages
	VVLAYEPVWAIGTGK	1	1	1	P60174		1602.89	0	0.01634				High	44.09	0.00178398				0
	QSLGELIGTLNAAK	1	1	1	P60174		1414.79	0	0.02341				High	27.96	0.0755791				0
Q9BXY0	Protein MAK16 homolog OS=Homo sapiens OX=9606 GN=MAK16 PE=1 SV=2 - [MAK16_HUMAN]	10	1	1	1	2					22.3	10	1	2					300	35.3467	5.37646
	Sequence	# PSMs	# Proteins	# Protein Groups	Protein Group Accessions	Modifications	MH+ [Da]	q-Value	PEP	A2	IonScore A2	Exp Value A2	B2	IonScore B2	Exp Value B2	C2	IonScore C2	Exp Value C2	# Missed Cleavages
	ALEQQEAESDSSDTEEKDDDDDDEEDVGKR	2	1	1	Q9BXY0	S11(Phospho); S12(Phospho)	3559.3	0.002	0.08778				High	22.3	0.198735				2
P30101	Protein disulfide-isomerase A3 OS=Homo sapiens OX=9606 GN=PDIA3 PE=1 SV=4 - [PDIA3_HUMAN]	9.9	1	4	4	5	67.3533	7.72	3	3	0	2.18	1	1	0	3.17	1	1	505	56.7468	6.354
	Sequence	# PSMs	# Proteins	# Protein Groups	Protein Group Accessions	Modifications	MH+ [Da]	q-Value	PEP	A2	IonScore A2	Exp Value A2	B2	IonScore B2	Exp Value B2	C2	IonScore C2	Exp Value C2	# Missed Cleavages
	VVVAENFDEIVNNENK	2	1	1	P30101		1832.91	0	3.936e-16	High	51.44	0.000614432				High	21.59	0.594613	0
	FLQDYFDGNLK	1	1	1	P30101		1359.66	0	0.0009097	High	35.84	0.021605							0
	GFPTIYFSPANK	1	1	1	P30101		1341.68	0.001	0.001827	High	16.74	1.66609							0
	ELSDFISYLQR	1	1	1	P30101		1370.7	0.002	0.06617				High	22.68	0.444827				0
J3KSY7	Protein CASC3 (Fragment) OS=Homo sapiens OX=9606 GN=CASC3 PE=1 SV=1 - [J3KSY7_HUMAN]	9.87	2	1	1	2					44.82	9.87	1	2					223	25.7461	9.17334
	Sequence	# PSMs	# Proteins	# Protein Groups	Protein Group Accessions	Modifications	MH+ [Da]	q-Value	PEP	A2	IonScore A2	Exp Value A2	B2	IonScore B2	Exp Value B2	C2	IonScore C2	Exp Value C2	# Missed Cleavages
	STVTGERQSGDGQESTEPVENK	2	2	1	J3KSY7	S9(Phospho)	2415.03	0	0.01105				High	31.56	0.0574994				1
P29590	Protein PML OS=Homo sapiens OX=9606 GN=PML PE=1 SV=3 - [PML_HUMAN]	9.86	3	3	3	5	26.87	9.86	3	5									882	97.4889	6.21436
	Sequence	# PSMs	# Proteins	# Protein Groups	Protein Group Accessions	Modifications	MH+ [Da]	q-Value	PEP	A2	IonScore A2	Exp Value A2	B2	IonScore B2	Exp Value B2	C2	IonScore C2	Exp Value C2	# Missed Cleavages
	KASPEAASTPRDPIDVDLPEEAER	2	3	1	P29590	S3(Phospho)	2673.24	0	2.97e-10	High	27.45	0.200844							2
	KASPEAASTPRDPIDVDLPEEAER	1	3	1	P29590	S3(Phospho); S8(Phospho)	2753.21	0	7.911e-05	High	19.57	1.13444							2
	QPSPSPSPTERAPASEEEFQFLR	1	1	1	P29590	S3(Phospho); S7(Phospho)	2747.18	0.001	0.001827	High	18.92	1.13999							1
	AVSPPHLDGPPSPRSPVIGSEVFLPNSNHVASGAGEAEER	1	2	1	P29590	S3(Phospho); S12(Phospho); S15(Phospho)	4300.92	0.001	0.001827	High	16.99	1.95387							1
S5FZ81	PHD finger protein 10 OS=Homo sapiens OX=9606 GN=PHF10 PE=1 SV=1 - [S5FZ81_HUMAN]	9.81	2	1	1	2					25.36	9.81	1	2					377	42.5859	5.45264
	Sequence	# PSMs	# Proteins	# Protein Groups	Protein Group Accessions	Modifications	MH+ [Da]	q-Value	PEP	A2	IonScore A2	Exp Value A2	B2	IonScore B2	Exp Value B2	C2	IonScore C2	Exp Value C2	# Missed Cleavages
	YLPLNTALYEPPLDPELPALDSDGDSDDGEDGRGDEK	2	2	1	S5FZ81	S22(Phospho); S26(Phospho)	4148.76	0.002	0.05899				High	25.36	0.23504				1
F8WC91	U4/U6.U5 tri-snRNP-associated protein 2 OS=Homo sapiens OX=9606 GN=USP39 PE=1 SV=1 - [F8WC91_HUMAN]	9.74	3	2	2	3					35.88	9.74	2	2	35.06	9.74	1	1	154	17.5188	9.43701
	Sequence	# PSMs	# Proteins	# Protein Groups	Protein Group Accessions	Modifications	MH+ [Da]	q-Value	PEP	A2	IonScore A2	Exp Value A2	B2	IonScore B2	Exp Value B2	C2	IonScore C2	Exp Value C2	# Missed Cleavages
	EREVDEDSEPEREVR	2	3	1	F8WC91	S8(Phospho)	1953.81	0.001	0.001427				High	26.84	0.158469	High	35.06	0.0230954	2
	EVDEDSEPEREVR	1	3	1	F8WC91	S6(Phospho)	1668.68	0.004	0.1731				High	29.04	0.0659866				1
O95994	Anterior gradient protein 2 homolog OS=Homo sapiens OX=9606 GN=AGR2 PE=1 SV=1 - [AGR2_HUMAN]	9.71	1	1	1	1	33.61	9.71	1	1									175	19.9666	8.99756
	Sequence	# PSMs	# Proteins	# Protein Groups	Protein Group Accessions	Modifications	MH+ [Da]	q-Value	PEP	A2	IonScore A2	Exp Value A2	B2	IonScore B2	Exp Value B2	C2	IonScore C2	Exp Value C2	# Missed Cleavages
	LYAYEPADTALLLDNMK	1	1	1	O95994		1940.97	0	3.79e-07	High	33.61	0.0442262							0
Q13283	Ras GTPase-activating protein-binding protein 1 OS=Homo sapiens OX=9606 GN=G3BP1 PE=1 SV=1 - [G3BP1_HUMAN]	9.66	1	2	2	7	122.38	9.66	2	5					35.19	9.66	2	2	466	52.1321	5.51611
	Sequence	# PSMs	# Proteins	# Protein Groups	Protein Group Accessions	Modifications	MH+ [Da]	q-Value	PEP	A2	IonScore A2	Exp Value A2	B2	IonScore B2	Exp Value B2	C2	IonScore C2	Exp Value C2	# Missed Cleavages
	SSSPAPADIAQTVQEDLR	4	1	1	Q13283	S3(Phospho)	1964.9	0	3.936e-16	High	60.2	9.74092e-05				High	22.28	0.58535	0
	YQDEVFGGFVTEPQEESEEEVEEPEER	3	1	1	Q13283	S17(Phospho)	3296.34	0	3.936e-16	High	56.19	0.000169027				High	31.41	0.0468716	0
P00558	Phosphoglycerate kinase 1 OS=Homo sapiens OX=9606 GN=PGK1 PE=1 SV=3 - [PGK1_HUMAN]	9.59	1	3	3	4	48.93	9.59	3	4									417	44.5861	8.104
	Sequence	# PSMs	# Proteins	# Protein Groups	Protein Group Accessions	Modifications	MH+ [Da]	q-Value	PEP	A2	IonScore A2	Exp Value A2	B2	IonScore B2	Exp Value B2	C2	IonScore C2	Exp Value C2	# Missed Cleavages
	ACANPAAGSVILLENLR	2	1	1	P00558	C2(Carbamidomethyl)	1768.94	0	3.936e-16	High	46.33	0.0013305							0
	ITLPVDFVTADK	1	1	1	P00558		1318.73	0.001	0.0009097	High	19.66	0.591004							0
	YSLEPVAVELK	1	1	1	P00558		1247.69	0.001	0.0009097	High	15.68	1.42228							0
H7C3I1	Hsc70-interacting protein (Fragment) OS=Homo sapiens OX=9606 GN=ST13 PE=1 SV=1 - [H7C3I1_HUMAN]	9.59	5	1	1	1					30.92	9.59	1	1					146	16.3191	4.88135
	Sequence	# PSMs	# Proteins	# Protein Groups	Protein Group Accessions	Modifications	MH+ [Da]	q-Value	PEP	A2	IonScore A2	Exp Value A2	B2	IonScore B2	Exp Value B2	C2	IonScore C2	Exp Value C2	# Missed Cleavages
	VAAIEALNDGELQK	1	5	1	H7C3I1		1470.78	0	0.0239				High	30.92	0.0572435				0
H0YBJ8	Protein LYRIC (Fragment) OS=Homo sapiens OX=9606 GN=MTDH PE=1 SV=1 - [H0YBJ8_HUMAN]	9.57	3	2	2	6	47.26	9.57	2	3	36.38	9.57	1	1	67.7	8.51	1	2	188	20.559	5.12256
	Sequence	# PSMs	# Proteins	# Protein Groups	Protein Group Accessions	Modifications	MH+ [Da]	q-Value	PEP	A2	IonScore A2	Exp Value A2	B2	IonScore B2	Exp Value B2	C2	IonScore C2	Exp Value C2	# Missed Cleavages
	SQEPIPDDQKVSDDDK	4	3	1	H0YBJ8	S12(Phospho)	1895.78	0	5.721e-10	High	48.67	0.000980702				High	60.33	6.0383e-05	1
	SQEPIPDDQKVSDDDKEK	2	3	1	H0YBJ8	S12(Phospho)	2152.93	0	0.02081	High	20.97	0.688257	High	36.38	0.0201376				2
P59665	Neutrophil defensin 1 OS=Homo sapiens OX=9606 GN=DEFA1 PE=1 SV=1 - [DEF1_HUMAN]	9.57	2	1	1	2	38.49	9.57	1	1					28.21	9.57	1	1	94	10.1942	6.99072
	Sequence	# PSMs	# Proteins	# Protein Groups	Protein Group Accessions	Modifications	MH+ [Da]	q-Value	PEP	A2	IonScore A2	Exp Value A2	B2	IonScore B2	Exp Value B2	C2	IonScore C2	Exp Value C2	# Missed Cleavages
	IPACIAGER	2	2	1	P59665	C4(Carbamidomethyl)	986.509	0	0.0001408	High	38.49	0.00734797				High	28.21	0.0684821	0
A0A087X2B6	Cell cycle and apoptosis regulator protein 2 OS=Homo sapiens OX=9606 GN=CCAR2 PE=1 SV=1 - [A0A087X2B6_HUMAN]	9.56	4	1	1	1	34.66	9.56	1	1									272	30.4101	4.48779
	Sequence	# PSMs	# Proteins	# Protein Groups	Protein Group Accessions	Modifications	MH+ [Da]	q-Value	PEP	A2	IonScore A2	Exp Value A2	B2	IonScore B2	Exp Value B2	C2	IonScore C2	Exp Value C2	# Missed Cleavages
	LEDSEVRSVASNQSEMEFSSLQDMPK	1	4	1	A0A087X2B6	S8(Phospho); S11(Phospho)	3103.28	0	3.936e-16	High	34.66	0.0262298							1
D6RBE9	Annexin OS=Homo sapiens OX=9606 GN=ANXA5 PE=1 SV=1 - [D6RBE9_HUMAN]	9.55	3	2	2	2	39.61	9.55	2	2									220	24.6824	4.89404
	Sequence	# PSMs	# Proteins	# Protein Groups	Protein Group Accessions	Modifications	MH+ [Da]	q-Value	PEP	A2	IonScore A2	Exp Value A2	B2	IonScore B2	Exp Value B2	C2	IonScore C2	Exp Value C2	# Missed Cleavages
	SEIDLFNIR	1	3	1	D6RBE9		1106.58	0	1.29e-05	High	39.61	0.00690286							0
	GTVTDFPGFDER	1	2	1	D6RBE9		1340.61	0.001	0.001827	High	23.1	0.406761							0
H7C072	THO complex subunit 5 homolog (Fragment) OS=Homo sapiens OX=9606 GN=THOC5 PE=1 SV=8 - [H7C072_HUMAN]	9.54	2	1	1	1	24.67	9.54	1	1									262	30.2344	6.07471
	Sequence	# PSMs	# Proteins	# Protein Groups	Protein Group Accessions	Modifications	MH+ [Da]	q-Value	PEP	A2	IonScore A2	Exp Value A2	B2	IonScore B2	Exp Value B2	C2	IonScore C2	Exp Value C2	# Missed Cleavages
	ALFKPPEDSQDDESDSDAEEEQTTK	1	2	1	H7C072	S14(Phospho); S16(Phospho)	2971.13	0	4.938e-16	High	24.67	0.153707							0
A0A087WUV8	Basigin OS=Homo sapiens OX=9606 GN=BSG PE=1 SV=1 - [A0A087WUV8_HUMAN]	9.52	2	2	2	4	96.4833	9.52	2	3					37.86	9.52	1	1	189	20.5294	6.68311
	Sequence	# PSMs	# Proteins	# Protein Groups	Protein Group Accessions	Modifications	MH+ [Da]	q-Value	PEP	A2	IonScore A2	Exp Value A2	B2	IonScore B2	Exp Value B2	C2	IonScore C2	Exp Value C2	# Missed Cleavages
	RKPEDVLDDDDAGSAPLK	3	2	1	A0A087WUV8	S14(Phospho)	2020.92	0	3.936e-16	High	69.28	1.29953e-05				High	37.86	0.0174403	1
	KPEDVLDDDDAGSAPLK	1	2	1	A0A087WUV8	S13(Phospho)	1864.82	0	3.936e-16	High	47.99	0.0015258							0
P08727	Keratin, type I cytoskeletal 19 OS=Homo sapiens OX=9606 GN=KRT19 PE=1 SV=4 - [K1C19_HUMAN]	9.5	2	4	4	4		0			69.04	7.25	3	3					400	44.0791	5.13525
	Sequence	# PSMs	# Proteins	# Protein Groups	Protein Group Accessions	Modifications	MH+ [Da]	q-Value	PEP	A2	IonScore A2	Exp Value A2	B2	IonScore B2	Exp Value B2	C2	IonScore C2	Exp Value C2	# Missed Cleavages
	IVLQIDNAR	1	2	1	F8VZY9		1041.61	0	4.101e-05	High	27.77	0.0434484							0
	SQYEVMAEQNR	1	2	1	P08727		1354.61	0	0.01688				High	64.22	2.75317e-05				0
	VLDELTLAR	1	3	1	P08727		1029.59	0	0.03242				High	25.32	0.164068				0
	DAEAWFTSR	1	2	1	P08727		1082.49	0	0.05279				High	17.98	0.896414				0
P48681	Nestin OS=Homo sapiens OX=9606 GN=NES PE=1 SV=2 - [NEST_HUMAN]	9.5	1	7	7	17	168.423	9.5	6	7	63.52	4.07	3	3	100.906	5.74	4	7	1621	177.332	4.36084
	Sequence	# PSMs	# Proteins	# Protein Groups	Protein Group Accessions	Modifications	MH+ [Da]	q-Value	PEP	A2	IonScore A2	Exp Value A2	B2	IonScore B2	Exp Value B2	C2	IonScore C2	Exp Value C2	# Missed Cleavages
	DGESDGFADEEESGEEGEEDQEEGREPGAGR	2	1	1	P48681	S13(Phospho)	3378.24	0	3.936e-16	High	127.09	6.90859e-12				High	69.48	3.36468e-06	1
	ENQEPLRSPEVGDEEALRPLTK	2	1	1	P48681	S8(Phospho)	2587.25	0	2.004e-12	High	45.53	0.00296692				High	17.48	1.97407	1
	GEYQESLRSLEEEGQELPQSADVQR	2	1	1	P48681	S6(Phospho)	2957.32	0	8.834e-13	High	39.88	0.0115343				High	22.06	0.656216	1
	SLGEQDQMTLRPPEK	6	1	1	P48681	S1(Phospho)	1808.82	0	3.334e-06	High	23.04	0.500813				High	38.25	0.0144237	0
	EGWDPAVLASEGLEAPPSEK	1	1	1	P48681	S18(Phospho)	2161.97	0	0.01972				High	34.48	0.0358768				0
	QEASTGQSPEDHASLAPPLSPDHSSLEAK	1	1	1	P48681	S20(Phospho)	3066.37	0.001	0.0009941	High	20.38	1.11275							0
	DGESDGFADEEESGEEGEEDQEEGREPGAGR	1	1	1	P48681	S4(Phospho); S13(Phospho)	3458.21	0.002	0.07275				High	47.04	0.000457668				1
	SLGEQDQMTLRPPEK	1	1	1	P48681	S1(Phospho); M8(Oxidation)	1824.82	0.002	0.09553				High	10.57	8.45867				0
	EGWDPAVLASEGLEAPPSEKEEGEEGEEECGR	1	1	1	P48681	S18(Phospho); C30(Carbamidomethyl)	3552.47	0.003	0.01384	High	14.38	3.10588							1
H3BPE4	Eukaryotic translation initiation factor 3 subunit C (Fragment) OS=Homo sapiens OX=9606 GN=EIF3C PE=1 SV=1 - [H3BPE4_HUMAN]	9.46	3	1	1	2	27.04	9.46	1	1		0			24.12	9.46	1	1	148	17.0469	9.02686
	Sequence	# PSMs	# Proteins	# Protein Groups	Protein Group Accessions	Modifications	MH+ [Da]	q-Value	PEP	A2	IonScore A2	Exp Value A2	B2	IonScore B2	Exp Value B2	C2	IonScore C2	Exp Value C2	# Missed Cleavages
	QPLLLSEDEEDTKR	2	3	1	H3BPE4	S6(Phospho)	1752.81	0	1.569e-09	High	27.04	0.19226				High	24.12	0.35589	1
F8VS07	LIM domain and actin-binding protein 1 OS=Homo sapiens OX=9606 GN=LIMA1 PE=1 SV=1 - [F8VS07_HUMAN]	9.43	3	2	2	3	28.22	3.29	1	2	31.55	6.14	1	1					456	51.0591	5.49072
	Sequence	# PSMs	# Proteins	# Protein Groups	Protein Group Accessions	Modifications	MH+ [Da]	q-Value	PEP	A2	IonScore A2	Exp Value A2	B2	IonScore B2	Exp Value B2	C2	IonScore C2	Exp Value C2	# Missed Cleavages
	ETPHSPGVEDAPIAK	2	3	1	F8VS07	S5(Phospho)	1627.74	0	3.725e-06	High	28.22	0.124446							0
	EGHSLEMENENLVENGADSDEDDNSFLK	1	3	1	F8VS07	M7(Oxidation); S19(Phospho)	3233.28	0.002	0.0534				High	31.55	0.0415006				0
E9PHI6	Dynein light intermediate chain OS=Homo sapiens OX=9606 GN=DYNC1LI1 PE=1 SV=1 - [E9PHI6_HUMAN]	9.34	3	2	2	3	29.78	4.67	1	2	0	4.67	1	1					407	43.1671	6.65381
	Sequence	# PSMs	# Proteins	# Protein Groups	Protein Group Accessions	Modifications	MH+ [Da]	q-Value	PEP	A2	IonScore A2	Exp Value A2	B2	IonScore B2	Exp Value B2	C2	IonScore C2	Exp Value C2	# Missed Cleavages
	KPVTVSPTTPTSPTEGEAS	1	2	1	E9PHI6	S12(Phospho)	1965.91	0	0.05058				High	28.36	0.148216				0
	DFQEYVEPGEDFPASPQRR	2	3	1	E9PHI6	S15(Phospho)	2347.01	0.001	0.001827	High	29.78	0.10162							1
H0Y6E7	RNA-binding motif protein, X chromosome (Fragment) OS=Homo sapiens OX=9606 GN=RBMX PE=1 SV=2 - [H0Y6E7_HUMAN]	9.25	5	2	2	2		0			16.76	9.25	2	2					292	31.8364	9.84717
	Sequence	# PSMs	# Proteins	# Protein Groups	Protein Group Accessions	Modifications	MH+ [Da]	q-Value	PEP	A2	IonScore A2	Exp Value A2	B2	IonScore B2	Exp Value B2	C2	IonScore C2	Exp Value C2	# Missed Cleavages
	VEQATKPSFESGR	1	3	1	H0Y6E7	S8(Phospho)	1515.68	0	0.05157				High	19.23	0.903252				0
	DYGHSSSRDDYPSR	1	5	1	H0Y6E7	S5(Phospho)	1721.66	0.002	0.09672				High	16.76	0.774921				1
A0A1W2PPS1	Heterogeneous nuclear ribonucleoprotein U OS=Homo sapiens OX=9606 GN=HNRNPU PE=1 SV=1 - [A0A1W2PPS1_HUMAN]	9.2	3	4	4	9	63.56	9.2	4	8					21.71	3.98	1	1	804	88.263	5.78271
	Sequence	# PSMs	# Proteins	# Protein Groups	Protein Group Accessions	Modifications	MH+ [Da]	q-Value	PEP	A2	IonScore A2	Exp Value A2	B2	IonScore B2	Exp Value B2	C2	IonScore C2	Exp Value C2	# Missed Cleavages
	LQAALDDEEAGGRPAMEPGNGSLDLGGDSAGR	3	3	1	A0A1W2PPS1	S22(Phospho)	3206.41	0	1.24e-15	High	41.39	0.00808882				High	21.71	0.736922	0
	AKSPQPPVEEEDEHFDDTVVCLDTYNCDLHFK	3	2	1	A0A1W2PPS1	S3(Phospho); C21(Carbamidomethyl); C27(Carbamidomethyl)	3914.67	0	1.595e-10	High	24.43	0.325963							1
	SPQPPVEEEDEHFDDTVVCLDTYNCDLHFK	2	2	1	A0A1W2PPS1	S1(Phospho); C19(Carbamidomethyl); C25(Carbamidomethyl)	3715.53	0	0.0009097	High	14.08	3.07201							0
	GYFEYIEENK	1	2	1	A0A1W2PPS1		1291.58	0.001	0.004897	High	19.13	0.756294							0
O43719	HIV Tat-specific factor 1 OS=Homo sapiens OX=9606 GN=HTATSF1 PE=1 SV=1 - [HTSF1_HUMAN]	9.14	1	4	4	4	90.46	9.14	3	3	29.65	2.12	1	1					755	85.8006	4.39893
	Sequence	# PSMs	# Proteins	# Protein Groups	Protein Group Accessions	Modifications	MH+ [Da]	q-Value	PEP	A2	IonScore A2	Exp Value A2	B2	IonScore B2	Exp Value B2	C2	IonScore C2	Exp Value C2	# Missed Cleavages
	VFDDESDEKEDEEYADEK	1	1	1	O43719	S6(Phospho)	2271.84	0	3.936e-16	High	56.6	7.16492e-05							1
	VLDEEGSEREFDEDSDEKEEEEDTYEK	1	1	1	O43719	S7(Phospho); S15(Phospho)	3440.27	0	3.936e-16	High	41.5	0.00252383							2
	LFEESDDKEDEDADGKEVEDADEK	1	1	1	O43719	S5(Phospho)	2837.1	0	3.632e-08	High	26.36	0.121383							2
	LFEESDDKEDEDADGK	1	1	1	O43719	S5(Phospho)	1921.72	0	0.009361				High	29.65	0.0377749				1
P00441	Superoxide dismutase [Cu-Zn] OS=Homo sapiens OX=9606 GN=SOD1 PE=1 SV=2 - [SODC_HUMAN]	9.09	1	1	1	1	20.6	9.09	1	1									154	15.9259	6.12549
	Sequence	# PSMs	# Proteins	# Protein Groups	Protein Group Accessions	Modifications	MH+ [Da]	q-Value	PEP	A2	IonScore A2	Exp Value A2	B2	IonScore B2	Exp Value B2	C2	IonScore C2	Exp Value C2	# Missed Cleavages
	GDGPVQGIINFEQK	1	1	1	P00441		1501.77	0	2.536e-05	High	20.6	0.634932							0
P42166	Lamina-associated polypeptide 2, isoform alpha OS=Homo sapiens OX=9606 GN=TMPO PE=1 SV=2 - [LAP2A_HUMAN]	9.08	1	1	5	17	107.3	7.35	3	7	45.64	9.08	4	6	49.5	3.75	1	4	694	75.4456	7.66455
	Sequence	# PSMs	# Proteins	# Protein Groups	Protein Group Accessions	Modifications	MH+ [Da]	q-Value	PEP	A2	IonScore A2	Exp Value A2	B2	IonScore B2	Exp Value B2	C2	IonScore C2	Exp Value C2	# Missed Cleavages
	SSTPLPTISSSAENTR	1	3	2	G5E972;P42166	T3(Phospho)	1727.79	0	6.943e-09	High	42.27	0.00575138							0
	GPPDFSSDEEREPTPVLGSGAAAAGR	5	3	2	G5E972;P42166	S6(Phospho)	2650.18	0	3.936e-16	High	40.5	0.00989734				High	38.45	0.0146533	1
	GPPDFSSDEEREPTPVLGSGAAAAGR	5	3	2	G5E972;P42166	S6(Phospho); S7(Phospho)	2730.15	0	9.008e-16	High	35.92	0.0218759	High	32.99	0.0430508	High	22.34	0.436709	1
	LREQGTESRSSTPLPTISSSAENTR	2	3	2	G5E972;P42166	S10(Phospho); S11(Phospho); T12(Phospho)	2944.25	0	2.365e-06	High	20.13	0.911794	High	19.28	1.1095				2
	LREQGTESRSSTPLPTISSSAENTR	2	3	2	G5E972;P42166	S10(Phospho); S11(Phospho)	2864.29	0.002	0.05954				High	23.96	0.440564				2
	EQGTESRSSTPLPTISSSAENTR	1	3	2	G5E972;P42166	S6(Phospho); S8(Phospho)	2595.1	0.002	0.1349				High	21.2	0.627344				1
	SHISDQSPLSSK	1	1	1	P42166	S7(Phospho)	1365.61	0.002	0.07265				High	17.01	1.14762				0
A0A669KB62	Catenin delta-1 OS=Homo sapiens OX=9606 GN=CTNND1 PE=1 SV=1 - [A0A669KB62_HUMAN]	9.01	5	6	6	9	55.7154	6.87	4	5	35.4	3.27	2	2	35.35	3.04	2	2	888	99.0171	6.94678
	Sequence	# PSMs	# Proteins	# Protein Groups	Protein Group Accessions	Modifications	MH+ [Da]	q-Value	PEP	A2	IonScore A2	Exp Value A2	B2	IonScore B2	Exp Value B2	C2	IonScore C2	Exp Value C2	# Missed Cleavages
	GSLASLDSLR	2	5	1	A0A669KB62	S5(Phospho)	1098.52	0	4.78e-09	High	51.27	0.000563196				High	35.35	0.0217348	0
	SMGYDDLDYGMMSDYGTAR	1	4	1	A0A669KB62	S1(Phospho)	2227.81	0	3.936e-16	High	29.72	0.0271982							0
	SQSSHSYDDSTLPLIDR	3	4	1	A0A669KB62	S4(Phospho)	2000.86	0	0.0001899	High	18.29	1.21566				High	15.6	2.17584	0
	TLDRSGDLGDMEPLK	1	4	1	A0A669KB62	S5(Phospho)	1726.77	0.001	0.001827	High	21.35	0.594321							1
	GSLASLDSLRK	1	5	1	A0A669KB62	S5(Phospho)	1226.61	0.002	0.1585				High	30.09	0.0788979				1
	HYEDGYPGGSDNYGSLSR	1	4	1	A0A669KB62	S15(Phospho)	2053.8	0.002	0.1135				High	25.81	0.121239				0
E9PHV6	Nuclear autoantigen Sp-100 OS=Homo sapiens OX=9606 GN=SP100 PE=1 SV=1 - [E9PHV6_HUMAN]	9.01	2	2	2	3					20.59	9.01	2	3					455	50.8725	4.85596
	Sequence	# PSMs	# Proteins	# Protein Groups	Protein Group Accessions	Modifications	MH+ [Da]	q-Value	PEP	A2	IonScore A2	Exp Value A2	B2	IonScore B2	Exp Value B2	C2	IonScore C2	Exp Value C2	# Missed Cleavages
	LPLQESEEEEREER	1	2	1	E9PHV6	S6(Phospho)	1852.8	0.002	0.1356				High	20.21	0.718408				1
	RVIGQDHDFSESSEEEAPAEASSGALR	1	2	1	E9PHV6	S10(Phospho); S12(Phospho); S13(Phospho)	3114.22	0.002	0.1291				High	13.57	2.33836				1
	RVIGQDHDFSESSEEEAPAEASSGALR	1	2	1	E9PHV6	S12(Phospho); S13(Phospho)	3034.25	0.004	0.171				High	17.38	1.32263				1
A0A0B4J1R6	Transketolase OS=Homo sapiens OX=9606 GN=TKT PE=1 SV=1 - [A0A0B4J1R6_HUMAN]	8.97	3	2	2	2	33.68	4.81	1	1	28.45	4.16	1	1					457	49.8789	7.91357
	Sequence	# PSMs	# Proteins	# Protein Groups	Protein Group Accessions	Modifications	MH+ [Da]	q-Value	PEP	A2	IonScore A2	Exp Value A2	B2	IonScore B2	Exp Value B2	C2	IonScore C2	Exp Value C2	# Missed Cleavages
	TSRPENAIIYNNNEDFQVGQAK	1	2	1	A0A0B4J1R6		2508.22	0	3.936e-16	High	33.68	0.0442262							0
	ILATPPQEDAPSVDIANIR	1	3	1	A0A0B4J1R6		2020.07	0.002	0.1035				High	28.45	0.0860194				0
Q92733	Proline-rich protein PRCC OS=Homo sapiens OX=9606 GN=PRCC PE=1 SV=1 - [PRCC_HUMAN]	8.96	1	2	2	4	36.55	8.96	2	4									491	52.3855	5.09717
	Sequence	# PSMs	# Proteins	# Protein Groups	Protein Group Accessions	Modifications	MH+ [Da]	q-Value	PEP	A2	IonScore A2	Exp Value A2	B2	IonScore B2	Exp Value B2	C2	IonScore C2	Exp Value C2	# Missed Cleavages
	IAAPELHKGDSDSEEDEPTK	2	1	1	Q92733	S11(Phospho); S13(Phospho)	2327.93	0	1.021e-10	High	29.85	0.0636095							1
	IAAPELHKGDSDSEEDEPTK	1	1	1	Q92733	S11(Phospho)	2247.97	0.001	0.0009097	High	23.2	0.420477							1
	QITQEEDDSDEEVAPENFFSLPEK	1	1	1	Q92733	S9(Phospho)	2876.21	0.001	0.009737	High	15.36	2.38824							0
Q96MW1	Coiled-coil domain-containing protein 43 OS=Homo sapiens OX=9606 GN=CCDC43 PE=1 SV=2 - [CCD43_HUMAN]	8.93	1	1	1	1	29.4	8.93	1	1									224	25.233	4.91943
	Sequence	# PSMs	# Proteins	# Protein Groups	Protein Group Accessions	Modifications	MH+ [Da]	q-Value	PEP	A2	IonScore A2	Exp Value A2	B2	IonScore B2	Exp Value B2	C2	IonScore C2	Exp Value C2	# Missed Cleavages
	AALLAQYADVTDEEDEADEK	1	1	1	Q96MW1	T11(Phospho)	2275.95	0	2.655e-07	High	29.4	0.0855374							0
C9JSU1	Leucine-rich repeat flightless-interacting protein 2 (Fragment) OS=Homo sapiens OX=9606 GN=LRRFIP2 PE=1 SV=1 - [C9JSU1_HUMAN]	8.89	2	1	1	3	54.2133	8.89	1	3									225	25.9659	5.17334
	Sequence	# PSMs	# Proteins	# Protein Groups	Protein Group Accessions	Modifications	MH+ [Da]	q-Value	PEP	A2	IonScore A2	Exp Value A2	B2	IonScore B2	Exp Value B2	C2	IonScore C2	Exp Value C2	# Missed Cleavages
	RGSGDTSSLIDPDTSLSELR	3	2	1	C9JSU1	T6(Phospho)	2186	0	3.936e-16	High	45.48	0.00290501							1
Q5QP22	RNA-binding protein 39 (Fragment) OS=Homo sapiens OX=9606 GN=RBM39 PE=1 SV=1 - [Q5QP22_HUMAN]	8.81	5	2	2	7	36.5867	8.81	2	5					27.7	8.81	1	2	193	23.1184	11.5757
	Sequence	# PSMs	# Proteins	# Protein Groups	Protein Group Accessions	Modifications	MH+ [Da]	q-Value	PEP	A2	IonScore A2	Exp Value A2	B2	IonScore B2	Exp Value B2	C2	IonScore C2	Exp Value C2	# Missed Cleavages
	DKSPVREPIDNLTPEER	5	5	1	Q5QP22	S3(Phospho)	2074.98	0	3.936e-16	High	31.54	0.0714783				High	23.34	0.459739	2
	SPVREPIDNLTPEER	2	5	1	Q5QP22	S1(Phospho)	1831.86	0.001	0.001827	High	18.24	1.39696							1
J3QR09	Ribosomal protein L19 OS=Homo sapiens OX=9606 GN=RPL19 PE=1 SV=1 - [J3QR09_HUMAN]	8.81	3	1	1	1					0	8.81	1	1					193	23.1201	11.4731
	Sequence	# PSMs	# Proteins	# Protein Groups	Protein Group Accessions	Modifications	MH+ [Da]	q-Value	PEP	A2	IonScore A2	Exp Value A2	B2	IonScore B2	Exp Value B2	C2	IonScore C2	Exp Value C2	# Missed Cleavages
	VWLDPNETNEIANANSR	1	3	1	J3QR09		1942.93	0	0.01576				High	32.07	0.0659673				0
Q9Y2W1	Thyroid hormone receptor-associated protein 3 OS=Homo sapiens OX=9606 GN=THRAP3 PE=1 SV=2 - [TR150_HUMAN]	8.8	2	7	7	17	171.173	8.8	6	10	29.94	1.99	1	2	33.9854	6.81	5	5	955	108.601	10.1548
	Sequence	# PSMs	# Proteins	# Protein Groups	Protein Group Accessions	Modifications	MH+ [Da]	q-Value	PEP	A2	IonScore A2	Exp Value A2	B2	IonScore B2	Exp Value B2	C2	IonScore C2	Exp Value C2	# Missed Cleavages
	WAHDKFSGEEGEIEDDESGTENREEK	3	1	1	Q9Y2W1	S7(Phospho); S18(Phospho)	3183.21	0	3.936e-16	High	57.15	9.37741e-05				High	24.87	0.143368	2
	FSGEEGEIEDDESGTENREEK	3	1	1	Q9Y2W1	S13(Phospho)	2465.95	0	2.636e-11	High	41.14	0.0041533				High	15.33	1.47277	1
	ASAVSELSPR	2	2	1	Q9Y2W1	S8(Phospho)	1096.5	0	1.206e-11	High	40.49	0.00601641				High	34.58	0.0227813	0
	KSPVGKSPPSTGSTYGSSQK	3	2	1	Q9Y2W1	S2(Phospho); S7(Phospho)	2139.94	0	1.055e-09	High	40.05	0.00910457				High	18.84	1.13376	2
	IDISPSTFR	2	2	1	Q9Y2W1	S4(Phospho)	1115.51	0	0.001335	High	35.02	0.018493				High	26.32	0.135924	0
	MDSFDEDLARPSGLLAQER	1	2	1	Q9Y2W1	S3(Phospho)	2229.99	0	3.104e-08	High	28.29	0.140617							0
	WAHDKFSGEEGEIEDDESGTENREEK	1	1	1	Q9Y2W1	S7(Phospho)	3103.25	0.001	0.001827	High	19.08	0.867017							2
	SPVGKSPPSTGSTYGSSQK	2	2	1	Q9Y2W1	S9(Phospho)	1931.88	0.002	0.08504				High	29.94	0.10494				1
Q9Y261	Hepatocyte nuclear factor 3-beta OS=Homo sapiens OX=9606 GN=FOXA2 PE=1 SV=1 - [FOXA2_HUMAN]	8.75	1	1	1	1	21.09	8.75	1	1									457	48.2748	8.68994
	Sequence	# PSMs	# Proteins	# Protein Groups	Protein Group Accessions	Modifications	MH+ [Da]	q-Value	PEP	A2	IonScore A2	Exp Value A2	B2	IonScore B2	Exp Value B2	C2	IonScore C2	Exp Value C2	# Missed Cleavages
	AAAGAQASQAQLGEAAGPASETPAGTESPHSSASPCQEHK	1	1	1	Q9Y261	S32(Phospho); S34(Phospho); C36(Carbamidomethyl)	4004.68	0	1.101e-06	High	21.09	0.646937							0
P02545	Prelamin-A/C OS=Homo sapiens OX=9606 GN=LMNA PE=1 SV=1 - [LMNA_HUMAN]	8.73	5	6	6	8	80.17	7.38	4	6	51.18	1.36	1	1	0	1.36	1	1	664	74.0947	7.02002
	Sequence	# PSMs	# Proteins	# Protein Groups	Protein Group Accessions	Modifications	MH+ [Da]	q-Value	PEP	A2	IonScore A2	Exp Value A2	B2	IonScore B2	Exp Value B2	C2	IonScore C2	Exp Value C2	# Missed Cleavages
	NKSNEDQSMGNWQIK	2	3	1	P02545	S3(Phospho)	1858.78	0	3.936e-16	High	52.97	0.000378244							1
	EDLQELNDR	1	2	1	P02545		1131.53	0	2.218e-05	High	42.78	0.00311593							0
	SGAQASSTPLSPTR	1	2	1	P02545	S11(Phospho)	1439.65	0	2.903e-05	High	22.29	0.455045							0
	LADALQELR	1	4	1	P02545		1028.57	0	0.01257				High	51.18	0.000314739				0
	LRLSPSPTSQR	1	4	1	P02545	S4(Phospho); S6(Phospho)	1401.63	0.001	0.001827	High	15.78	1.74927							1
	LSPSPTSQR	1	4	1	P02545	S4(Phospho)	1052.47	0.001	0.001439							High	10.18	4.61951	0
	LRLSPSPTSQR	1	4	1	P02545	S9(Phospho)	1321.66	0.005	0.0144	High	20.83	0.593921							1
E5RJ37	Tyrosine-protein kinase Lyn (Fragment) OS=Homo sapiens OX=9606 GN=LYN PE=1 SV=1 - [E5RJ37_HUMAN]	8.67	2	1	1	1	32.42	8.67	1	1									150	17.1268	6.59521
	Sequence	# PSMs	# Proteins	# Protein Groups	Protein Group Accessions	Modifications	MH+ [Da]	q-Value	PEP	A2	IonScore A2	Exp Value A2	B2	IonScore B2	Exp Value B2	C2	IonScore C2	Exp Value C2	# Missed Cleavages
	GKDSLSDDGVDLK	1	2	1	E5RJ37	S6(Phospho)	1428.63	0.001	0.001827	High	32.42	0.04127							1
D6RCR4	Drebrin (Fragment) OS=Homo sapiens OX=9606 GN=DBN1 PE=1 SV=1 - [D6RCR4_HUMAN]	8.6	3	1	1	1	33.94	8.6	1	1									93	10.0541	5.87158
	Sequence	# PSMs	# Proteins	# Protein Groups	Protein Group Accessions	Modifications	MH+ [Da]	q-Value	PEP	A2	IonScore A2	Exp Value A2	B2	IonScore B2	Exp Value B2	C2	IonScore C2	Exp Value C2	# Missed Cleavages
	LSSPVLHR	1	3	1	D6RCR4	S3(Phospho)	988.498	0.001	0.009348	High	33.94	0.0226041							0
Q9UBB9	Tuftelin-interacting protein 11 OS=Homo sapiens OX=9606 GN=TFIP11 PE=1 SV=1 - [TFP11_HUMAN]	8.6	2	5	5	6	119.62	8.6	5	6									837	96.7584	5.66846
	Sequence	# PSMs	# Proteins	# Protein Groups	Protein Group Accessions	Modifications	MH+ [Da]	q-Value	PEP	A2	IonScore A2	Exp Value A2	B2	IonScore B2	Exp Value B2	C2	IonScore C2	Exp Value C2	# Missed Cleavages
	GAAEEAELEDSDDEEKPVK	2	2	1	Q9UBB9	S11(Phospho)	2140.89	0	3.936e-16	High	73.99	2.7014e-06							0
	EEATYGVWAERDSDDERPSFGGK	1	2	1	Q9UBB9	S13(Phospho)	2681.12	0	3.936e-16	High	49.84	0.000785928							1
	GAAEEAELEDSDDEEKPVKQDDFPK	1	2	1	Q9UBB9	S11(Phospho)	2871.21	0	3.936e-16	High	29.53	0.0942693							1
	KGAAEEAELEDSDDEEKPVK	1	2	1	Q9UBB9	S12(Phospho)	2268.98	0	0.0009097	High	27.49	0.165583							1
	TTQSMQDFPVVDSEEEAEEEFQK	1	1	1	Q9UBB9	S13(Phospho)	2783.13	0.001	0.001827	High	11.95	4.59231							0
Q9H1E5	Thioredoxin-related transmembrane protein 4 OS=Homo sapiens OX=9606 GN=TMX4 PE=1 SV=1 - [TMX4_HUMAN]	8.6	1	2	2	2	32.37	8.6	1	1	29.38	5.73	1	1					349	38.9277	4.37354
	Sequence	# PSMs	# Proteins	# Protein Groups	Protein Group Accessions	Modifications	MH+ [Da]	q-Value	PEP	A2	IonScore A2	Exp Value A2	B2	IonScore B2	Exp Value B2	C2	IonScore C2	Exp Value C2	# Missed Cleavages
	AEQLQDAEEEKDDSNEEENKDSLVDDEEEK	1	1	1	Q9H1E5	S14(Phospho); S22(Phospho)	3669.4	0	0.0001731	High	32.37	0.0321003							2
	AEQLQDAEEEKDDSNEEENK	1	1	1	Q9H1E5	S14(Phospho)	2429.95	0	0.01539				High	29.38	0.057961				1
Q9H3Z4	DnaJ homolog subfamily C member 5 OS=Homo sapiens OX=9606 GN=DNAJC5 PE=1 SV=1 - [DNJC5_HUMAN]	8.59	1	1	1	3	29.72	8.59	1	2					20	8.59	1	1	198	22.1343	5.07178
	Sequence	# PSMs	# Proteins	# Protein Groups	Protein Group Accessions	Modifications	MH+ [Da]	q-Value	PEP	A2	IonScore A2	Exp Value A2	B2	IonScore B2	Exp Value B2	C2	IonScore C2	Exp Value C2	# Missed Cleavages
	SLSTSGESLYHVLGLDK	3	1	1	Q9H3Z4	S1(Phospho)	1885.9	0	1.58e-09	High	29.72	0.108046				High	20	1.009	0
P02792	Ferritin light chain OS=Homo sapiens OX=9606 GN=FTL PE=1 SV=2 - [FRIL_HUMAN]	8.57	1	1	1	1	23.45	8.57	1	1									175	20.0071	5.78271
	Sequence	# PSMs	# Proteins	# Protein Groups	Protein Group Accessions	Modifications	MH+ [Da]	q-Value	PEP	A2	IonScore A2	Exp Value A2	B2	IonScore B2	Exp Value B2	C2	IonScore C2	Exp Value C2	# Missed Cleavages
	LGGPEAGLGEYLFER	1	1	1	P02792		1607.81	0	3.593e-15	High	23.45	0.413222							0
H7C2Y0	Septin-2 (Fragment) OS=Homo sapiens OX=9606 GN=SEPTIN2 PE=1 SV=1 - [H7C2Y0_HUMAN]	8.51	3	1	1	6	27.61	8.51	1	2					59.05	8.51	1	4	188	21.6361	6.53662
	Sequence	# PSMs	# Proteins	# Protein Groups	Protein Group Accessions	Modifications	MH+ [Da]	q-Value	PEP	A2	IonScore A2	Exp Value A2	B2	IonScore B2	Exp Value B2	C2	IonScore C2	Exp Value C2	# Missed Cleavages
	IYHLPDAESDEDEDFK	6	3	1	H7C2Y0	S9(Phospho)	2002.78	0	1.699e-12	High	27.61	0.0877305				High	56.65	9.84037e-05	0
P51991	Heterogeneous nuclear ribonucleoprotein A3 OS=Homo sapiens OX=9606 GN=HNRNPA3 PE=1 SV=2 - [ROA3_HUMAN]	8.47	2	2	2	5	170.09	8.47	2	4					71.22	5.82	1	1	378	39.5706	9.01221
	Sequence	# PSMs	# Proteins	# Protein Groups	Protein Group Accessions	Modifications	MH+ [Da]	q-Value	PEP	A2	IonScore A2	Exp Value A2	B2	IonScore B2	Exp Value B2	C2	IonScore C2	Exp Value C2	# Missed Cleavages
	SSGSPYGGGYGSGGGSGGYGSR	4	2	1	P51991	S4(Phospho)	1990.76	0	3.936e-16	High	119.03	5.21983e-11				High	71.22	2.892e-06	0
	IETIEVMEDR	1	1	1	P51991		1234.6	0	1.814e-15	High	36.02	0.0170524							0
A0A087WU26	Ribosome-binding protein 1 OS=Homo sapiens OX=9606 GN=RRBP1 PE=1 SV=1 - [A0A087WU26_HUMAN]	8.38	4	1	1	1	27.13	8.38	1	1									346	38.7076	4.69092
	Sequence	# PSMs	# Proteins	# Protein Groups	Protein Group Accessions	Modifications	MH+ [Da]	q-Value	PEP	A2	IonScore A2	Exp Value A2	B2	IonScore B2	Exp Value B2	C2	IonScore C2	Exp Value C2	# Missed Cleavages
	SHVEDGDIAGAPASSPEAPPAEQDPVQLK	1	4	1	A0A087WU26	S15(Phospho)	2992.36	0	3.936e-16	High	27.13	0.233823							0
B4DP61	Survival motor neuron protein OS=Homo sapiens OX=9606 GN=SMN1 PE=1 SV=1 - [B4DP61_HUMAN]	8.37	4	1	1	4	32.28	8.37	1	3	25.21	8.37	1	1					227	24.365	8.6167
	Sequence	# PSMs	# Proteins	# Protein Groups	Protein Group Accessions	Modifications	MH+ [Da]	q-Value	PEP	A2	IonScore A2	Exp Value A2	B2	IonScore B2	Exp Value B2	C2	IonScore C2	Exp Value C2	# Missed Cleavages
	RGTGQSDDSDIWDDTALIK	2	4	1	B4DP61	S6(Phospho); S9(Phospho)	2252.92	0	3.936e-16	High	32.94	0.0366383							1
	RGTGQSDDSDIWDDTALIK	2	4	1	B4DP61	T3(Phospho)	2172.95	0	0.03355	High	17.34	1.72878	High	25.21	0.281867				1
Q8NAV1	Pre-mRNA-splicing factor 38A OS=Homo sapiens OX=9606 GN=PRPF38A PE=1 SV=1 - [PR38A_HUMAN]	8.33	1	1	1	1	29.44	8.33	1	1									312	37.4534	9.96436
	Sequence	# PSMs	# Proteins	# Protein Groups	Protein Group Accessions	Modifications	MH+ [Da]	q-Value	PEP	A2	IonScore A2	Exp Value A2	B2	IonScore B2	Exp Value B2	C2	IonScore C2	Exp Value C2	# Missed Cleavages
	VSALEEDMDDVESSEEEEEEDEKLER	1	1	1	Q8NAV1	S13(Phospho); S14(Phospho)	3230.21	0	5.652e-08	High	29.44	0.0476666							1
H0YBC7	BCL2/adenovirus E1B 19 kDa protein-interacting protein 3-like (Fragment) OS=Homo sapiens OX=9606 GN=BNIP3L PE=1 SV=1 - [H0YBC7_HUMAN]	8.11	2	1	1	2					67.52	8.11	1	2					185	20.0846	5.70654
	Sequence	# PSMs	# Proteins	# Protein Groups	Protein Group Accessions	Modifications	MH+ [Da]	q-Value	PEP	A2	IonScore A2	Exp Value A2	B2	IonScore B2	Exp Value B2	C2	IonScore C2	Exp Value C2	# Missed Cleavages
	DHSSQSEEEVVEGEK	2	2	1	H0YBC7	S6(Phospho)	1768.69	0	0.002427				High	59.07	5.50026e-05				0
P11021	Endoplasmic reticulum chaperone BiP OS=Homo sapiens OX=9606 GN=HSPA5 PE=1 SV=2 - [BIP_HUMAN]	8.1	1	2	4	8	143.59	8.1	4	5					60.9967	4.13	2	3	654	72.2884	5.16064
	Sequence	# PSMs	# Proteins	# Protein Groups	Protein Group Accessions	Modifications	MH+ [Da]	q-Value	PEP	A2	IonScore A2	Exp Value A2	B2	IonScore B2	Exp Value B2	C2	IonScore C2	Exp Value C2	# Missed Cleavages
	IINEPTAAAIAYGLDK	2	9	2	P11021;E9PKE3		1659.9	0	3.936e-16	High	94.37	1.92851e-08				High	21.28	0.446839	0
	ELEEIVQPIISK	1	1	1	P11021		1397.79	0	3.519e-12	High	48.75	0.000494736							0
	VEIIANDQGNR	4	13	3	P11021;E9PKE3;P0DMV9		1228.62	0	9.392e-09	High	41.78	0.00505108				High	47.21	0.00147999	0
	TFAPEEISAMVLTK	1	1	1	P11021		1536.8	0	3.936e-16	High	26.75	0.163373							0
P38646	Stress-70 protein, mitochondrial OS=Homo sapiens OX=9606 GN=HSPA9 PE=1 SV=2 - [GRP75_HUMAN]	8.1	1	4	4	4	75.36	8.1	4	4									679	73.6348	6.16357
	Sequence	# PSMs	# Proteins	# Protein Groups	Protein Group Accessions	Modifications	MH+ [Da]	q-Value	PEP	A2	IonScore A2	Exp Value A2	B2	IonScore B2	Exp Value B2	C2	IonScore C2	Exp Value C2	# Missed Cleavages
	VINEPTAAALAYGLDK	1	1	1	P38646		1645.88	0	3.936e-16	High	66.65	1.3809e-05							0
	DAGQISGLNVLR	1	1	1	P38646		1242.68	0	2.183e-08	High	27.55	0.0976527							0
	AQFEGIVTDLIR	1	1	1	P38646		1361.74	0	2.115e-05	High	26.24	0.137025							0
	NAVITVPAYFNDSQR	1	1	1	P38646		1694.85	0.001	0.0009097	High	21.67	0.605885							0
Q8TAD8	Smad nuclear-interacting protein 1 OS=Homo sapiens OX=9606 GN=SNIP1 PE=1 SV=1 - [SNIP1_HUMAN]	8.08	1	2	2	3					28.31	8.08	2	3					396	45.7503	9.99365
	Sequence	# PSMs	# Proteins	# Protein Groups	Protein Group Accessions	Modifications	MH+ [Da]	q-Value	PEP	A2	IonScore A2	Exp Value A2	B2	IonScore B2	Exp Value B2	C2	IonScore C2	Exp Value C2	# Missed Cleavages
	QERLSPEVAPPAHR	1	1	1	Q8TAD8	S5(Phospho)	1666.81	0	0.03981				High	27.99	0.148132				1
	RPDHSGGSPSPPTSEPAR	1	1	1	Q8TAD8	S5(Phospho)	1911.83	0.002	0.1592				High	21.99	0.493281				0
	RPDHSGGSPSPPTSEPAR	1	1	1	Q8TAD8	S5(Phospho); S8(Phospho)	1991.8	0.005	0.1963				High	23.82	0.2442				0
E9PH18	DnaJ homolog subfamily B member 6 OS=Homo sapiens OX=9606 GN=DNAJB6 PE=1 SV=1 - [E9PH18_HUMAN]	8.06	3	1	1	1	29.79	8.06	1	1									211	23.826	8.95361
	Sequence	# PSMs	# Proteins	# Protein Groups	Protein Group Accessions	Modifications	MH+ [Da]	q-Value	PEP	A2	IonScore A2	Exp Value A2	B2	IonScore B2	Exp Value B2	C2	IonScore C2	Exp Value C2	# Missed Cleavages
	HAPHCLSEEEGEQDRPR	1	3	1	E9PH18	C5(Carbamidomethyl); S7(Phospho)	2126.87	0	3.936e-16	High	29.79	0.0702669							0
F8WCJ4	Acetyl-coenzyme A synthetase, cytoplasmic OS=Homo sapiens OX=9606 GN=ACSS2 PE=1 SV=1 - [F8WCJ4_HUMAN]	8.06	6	1	1	3	27.5603	8.06	1	2					37.32	8.06	1	1	124	14.2802	9.33447
	Sequence	# PSMs	# Proteins	# Protein Groups	Protein Group Accessions	Modifications	MH+ [Da]	q-Value	PEP	A2	IonScore A2	Exp Value A2	B2	IonScore B2	Exp Value B2	C2	IonScore C2	Exp Value C2	# Missed Cleavages
	SWSPPPEVSR	3	6	1	F8WCJ4	S3(Phospho)	1221.52	0.001	0.001335	High	33.3	0.026848				High	37.32	0.0101574	0
H0YFD2	Protein KRI1 homolog (Fragment) OS=Homo sapiens OX=9606 GN=KRI1 PE=1 SV=4 - [H0YFD2_HUMAN]	8.06	5	1	1	5					107.6	8.06	1	5					186	21.8587	4.93213
	Sequence	# PSMs	# Proteins	# Protein Groups	Protein Group Accessions	Modifications	MH+ [Da]	q-Value	PEP	A2	IonScore A2	Exp Value A2	B2	IonScore B2	Exp Value B2	C2	IonScore C2	Exp Value C2	# Missed Cleavages
	YVDEENSDGETSNHR	5	5	1	H0YFD2	S7(Phospho)	1831.68	0	0.0289				High	48.06	0.000552573				0
P19338	Nucleolin OS=Homo sapiens OX=9606 GN=NCL PE=1 SV=3 - [NUCL_HUMAN]	8.03	3	3	3	7	72.26	6.9	2	4	57.14	6.06	2	3					710	76.5684	4.70361
	Sequence	# PSMs	# Proteins	# Protein Groups	Protein Group Accessions	Modifications	MH+ [Da]	q-Value	PEP	A2	IonScore A2	Exp Value A2	B2	IonScore B2	Exp Value B2	C2	IonScore C2	Exp Value C2	# Missed Cleavages
	KEDSDEEEDDDSEEDEEDDEDEDEDEDEIEPAAMK	1	3	1	P19338	S12(Phospho)	4199.42	0	2.326e-08	High	45.22	0.000482475							1
	KEDSDEEEDDDSEEDEEDDEDEDEDEDEIEPAAMK	2	3	1	P19338	S4(Phospho); S12(Phospho)	4279.38	0	3.936e-16	High	44.54	0.000457029							1
	KEDSDEEEDDDSEEDEEDDEDEDEDEDEIEPAAMK	2	3	1	P19338	S4(Phospho); S12(Phospho); M34(Oxidation)	4295.36	0	0.02232				High	43.44	0.000600089				1
	GFGFVDFNSEEDAK	1	1	1	P19338		1561.68	0.001	0.001827	High	15.9	1.86996							0
	KVVVSPTK	1	3	1	P19338	S5(Phospho)	937.512	0.002	0.1228				High	22.82	0.255191				1
P30086	Phosphatidylethanolamine-binding protein 1 OS=Homo sapiens OX=9606 GN=PEBP1 PE=1 SV=3 - [PEBP1_HUMAN]	8.02	1	1	1	1	23.51	8.02	1	1									187	21.0437	7.53271
	Sequence	# PSMs	# Proteins	# Protein Groups	Protein Group Accessions	Modifications	MH+ [Da]	q-Value	PEP	A2	IonScore A2	Exp Value A2	B2	IonScore B2	Exp Value B2	C2	IonScore C2	Exp Value C2	# Missed Cleavages
	NRPTSISWDGLDSGK	1	1	1	P30086	S5(Phospho)	1712.77	0.001	0.0009097	High	23.51	0.383042							0
F8W7C6	60S ribosomal protein L10 OS=Homo sapiens OX=9606 GN=RPL10 PE=1 SV=2 - [F8W7C6_HUMAN]	7.98	4	1	1	1					25.41	7.98	1	1					163	18.5527	9.94971
	Sequence	# PSMs	# Proteins	# Protein Groups	Protein Group Accessions	Modifications	MH+ [Da]	q-Value	PEP	A2	IonScore A2	Exp Value A2	B2	IonScore B2	Exp Value B2	C2	IonScore C2	Exp Value C2	# Missed Cleavages
	FNADEFEDMVAEK	1	4	1	F8W7C6		1544.66	0	0.01523				High	25.41	0.171205				0
H7BXF3	Transformer-2 protein homolog beta (Fragment) OS=Homo sapiens OX=9606 GN=TRA2B PE=1 SV=1 - [H7BXF3_HUMAN]	7.87	4	2	2	2					34.02	7.87	2	2					127	15.2204	10.1987
	Sequence	# PSMs	# Proteins	# Protein Groups	Protein Group Accessions	Modifications	MH+ [Da]	q-Value	PEP	A2	IonScore A2	Exp Value A2	B2	IonScore B2	Exp Value B2	C2	IonScore C2	Exp Value C2	# Missed Cleavages
	SPSPYYSR	1	4	1	H7BXF3	S3(Phospho)	1036.41	0.002	0.1511				High	34.02	0.0133942				0
	RRSPSPYYSR	1	3	1	H7BXF3	S3(Phospho); S5(Phospho)	1428.58	0.002	0.1588				High	14.62	1.53762				2
P55884	Eukaryotic translation initiation factor 3 subunit B OS=Homo sapiens OX=9606 GN=EIF3B PE=1 SV=3 - [EIF3B_HUMAN]	7.86	2	2	2	5	51.9067	5.65	1	3	42.81	2.21	1	2					814	92.4238	4.99561
	Sequence	# PSMs	# Proteins	# Protein Groups	Protein Group Accessions	Modifications	MH+ [Da]	q-Value	PEP	A2	IonScore A2	Exp Value A2	B2	IonScore B2	Exp Value B2	C2	IonScore C2	Exp Value C2	# Missed Cleavages
	TEPAAEAEAASGPSESPSPPAAEELPGSHAEPPVPAQGEAPGEQAR	3	1	1	P55884	S18(Phospho)	4538.05	0	3.936e-16	High	34.69	0.0313644							0
	SDSRAQAVSEDAGGNEGR	2	2	1	P55884	S3(Phospho)	1885.77	0.002	0.07777				High	31.25	0.0490806				1
F8W860	Phosphatidylinositol 4-kinase beta (Fragment) OS=Homo sapiens OX=9606 GN=PI4KB PE=1 SV=1 - [F8W860_HUMAN]	7.85	3	1	1	3	74.16	7.85	1	2					45.23	7.85	1	1	191	21.4719	5.98584
	Sequence	# PSMs	# Proteins	# Protein Groups	Protein Group Accessions	Modifications	MH+ [Da]	q-Value	PEP	A2	IonScore A2	Exp Value A2	B2	IonScore B2	Exp Value B2	C2	IonScore C2	Exp Value C2	# Missed Cleavages
	SVENLPECGITHEQR	3	3	1	F8W860	S1(Phospho); C8(Carbamidomethyl)	1848.8	0	3.936e-16	High	64.69	2.8087e-05				High	45.23	0.00227636	0
Q7Z5L9	Interferon regulatory factor 2-binding protein 2 OS=Homo sapiens OX=9606 GN=IRF2BP2 PE=1 SV=2 - [I2BP2_HUMAN]	7.84	1	3	3	4	67.32	7.84	3	4									587	60.9867	8.68994
	Sequence	# PSMs	# Proteins	# Protein Groups	Protein Group Accessions	Modifications	MH+ [Da]	q-Value	PEP	A2	IonScore A2	Exp Value A2	B2	IonScore B2	Exp Value B2	C2	IonScore C2	Exp Value C2	# Missed Cleavages
	RPASVSSSAAVEHEQR	1	1	1	Q7Z5L9	S7(Phospho)	1790.82	0	3.936e-16	High	51.52	0.000629996							0
	LEEPPELNRQSPNPR	2	1	1	Q7Z5L9	S11(Phospho)	1855.87	0	0.0009097	High	29.58	0.105858							1
	RKPSPEPEGEVGPPK	1	1	1	Q7Z5L9	S4(Phospho)	1683.81	0.001	0.001827	High	30.59	0.0868607							1
B7ZKW8	CapZ-interacting protein OS=Homo sapiens OX=9606 GN=RCSD1 PE=1 SV=1 - [B7ZKW8_HUMAN]	7.77	2	1	1	2					53.36	7.77	1	2					386	41.2363	5.26221
	Sequence	# PSMs	# Proteins	# Protein Groups	Protein Group Accessions	Modifications	MH+ [Da]	q-Value	PEP	A2	IonScore A2	Exp Value A2	B2	IonScore B2	Exp Value B2	C2	IonScore C2	Exp Value C2	# Missed Cleavages
	RSSEEVDGQHPAQEEVPESPQTSGPEAENR	2	2	1	B7ZKW8	S3(Phospho)	3356.43	0	0.03933				High	50.57	0.00100548				1
P49006	MARCKS-related protein OS=Homo sapiens OX=9606 GN=MARCKSL1 PE=1 SV=2 - [MRP_HUMAN]	7.69	1	1	1	1					47.63	7.69	1	1					195	19.5172	4.66553
	Sequence	# PSMs	# Proteins	# Protein Groups	Protein Group Accessions	Modifications	MH+ [Da]	q-Value	PEP	A2	IonScore A2	Exp Value A2	B2	IonScore B2	Exp Value B2	C2	IonScore C2	Exp Value C2	# Missed Cleavages
	GDVTAEEAAGASPAK	1	1	1	P49006	S12(Phospho)	1453.62	0	0.007677				High	47.63	0.00109591				0
K7EMV3	Histone H3 OS=Homo sapiens OX=9606 GN=H3-3B PE=1 SV=1 - [K7EMV3_HUMAN]	7.61	12	1	1	1	36.92	7.61	1	1									92	10.3278	11.8247
	Sequence	# PSMs	# Proteins	# Protein Groups	Protein Group Accessions	Modifications	MH+ [Da]	q-Value	PEP	A2	IonScore A2	Exp Value A2	B2	IonScore B2	Exp Value B2	C2	IonScore C2	Exp Value C2	# Missed Cleavages
	STELLIR	1	12	1	K7EMV3		831.494	0.001	0.001827	High	36.92	0.0115844							0
O60832	H/ACA ribonucleoprotein complex subunit DKC1 OS=Homo sapiens OX=9606 GN=DKC1 PE=1 SV=3 - [DKC1_HUMAN]	7.59	1	2	2	7	27.34	7.59	2	4	29.5533	7.59	2	3					514	57.6378	9.42236
	Sequence	# PSMs	# Proteins	# Protein Groups	Protein Group Accessions	Modifications	MH+ [Da]	q-Value	PEP	A2	IonScore A2	Exp Value A2	B2	IonScore B2	Exp Value B2	C2	IonScore C2	Exp Value C2	# Missed Cleavages
	KRESESESDETPPAAPQLIK	2	1	1	O60832	S4(Phospho); S6(Phospho)	2372.04	0	2.135e-15	High	27.2	0.200264	High	17.81	1.74932				2
	AGLESGAEPGDGDSDTTKK	2	1	1	O60832	S14(Phospho)	1914.8	0	0.01299	High	14.79	2.27016	High	31.25	0.0512928				1
	KRESESESDETPPAAPQLIK	2	1	1	O60832	S4(Phospho); S6(Phospho); S8(Phospho)	2452.01	0.001	0.001827	High	21.14	0.621073	High	15.16	2.43527				2
	KRESESESDETPPAAPQLIK	1	1	1	O60832	S6(Phospho)	2292.08	0.001	0.004498	High	17.73	1.90243							2
D6REM6	Matrin-3 OS=Homo sapiens OX=9606 GN=MATR3 PE=1 SV=1 - [D6REM6_HUMAN]	7.56	4	3	3	4	37.37	5.79	2	2	20.94	4.53	2	2					794	88.3045	5.75732
	Sequence	# PSMs	# Proteins	# Protein Groups	Protein Group Accessions	Modifications	MH+ [Da]	q-Value	PEP	A2	IonScore A2	Exp Value A2	B2	IonScore B2	Exp Value B2	C2	IonScore C2	Exp Value C2	# Missed Cleavages
	RDSFDDRGPSLNPVLDYDHGSR	2	4	1	D6REM6	S3(Phospho)	2598.14	0	3.936e-16	High	35.27	0.0295384	High	20.94	0.803768				2
	DTSENADGQSDENKDDYTIPDEYR	1	3	1	D6REM6	S10(Phospho)	2857.1	0	6.253e-16	High	27.1	0.094665							1
	SYSPDGKESPSDKK	1	3	1	D6REM6	S3(Phospho); S11(Phospho)	1684.65	0.002	0.1043				High	16.12	0.950494				2
Q5W011	Splicing factor 45 (Fragment) OS=Homo sapiens OX=9606 GN=RBM17 PE=1 SV=1 - [Q5W011_HUMAN]	7.55	5	2	2	6	48.5167	7.55	2	4					36.0298	7.55	2	2	212	24.1613	6.18896
	Sequence	# PSMs	# Proteins	# Protein Groups	Protein Group Accessions	Modifications	MH+ [Da]	q-Value	PEP	A2	IonScore A2	Exp Value A2	B2	IonScore B2	Exp Value B2	C2	IonScore C2	Exp Value C2	# Missed Cleavages
	RPDPDSDEDEDYERER	3	5	1	Q5W011	S6(Phospho)	2102.8	0	2.415e-13	High	30.78	0.0337166				High	23.51	0.156648	1
	RPDPDSDEDEDYER	3	5	1	Q5W011	S6(Phospho)	1817.64	0	9.217e-08	High	27.88	0.0388587				High	35.61	0.00570188	0
P20700	Lamin-B1 OS=Homo sapiens OX=9606 GN=LMNB1 PE=1 SV=2 - [LMNB1_HUMAN]	7.51	3	2	2	4	27.56	7.51	2	4									586	66.3676	5.16064
	Sequence	# PSMs	# Proteins	# Protein Groups	Protein Group Accessions	Modifications	MH+ [Da]	q-Value	PEP	A2	IonScore A2	Exp Value A2	B2	IonScore B2	Exp Value B2	C2	IonScore C2	Exp Value C2	# Missed Cleavages
	DQIAQLEASLAAAK	1	3	1	P20700		1428.77	0	3.936e-16	High	27.56	0.111108							0
	TTIPEEEEEEEEAAGVVVEEELFHQQGTPR	3	1	1	P20700	T28(Phospho)	3491.54	0	2.137e-14	High	18.64	1.44842							0
Q96JM3	Chromosome alignment-maintaining phosphoprotein 1 OS=Homo sapiens OX=9606 GN=CHAMP1 PE=1 SV=2 - [CHAP1_HUMAN]	7.51	1	4	4	6	38.6985	6.16	3	3	24.38	3.08	2	2	21.64	1.72	1	1	812	89.0429	8.44092
	Sequence	# PSMs	# Proteins	# Protein Groups	Protein Group Accessions	Modifications	MH+ [Da]	q-Value	PEP	A2	IonScore A2	Exp Value A2	B2	IonScore B2	Exp Value B2	C2	IonScore C2	Exp Value C2	# Missed Cleavages
	KTSPASLDFPESQK	3	1	1	Q96JM3	S3(Phospho)	1614.74	0	3.756e-06	High	37.78	0.0151803	High	24.38	0.33375	High	21.64	0.604258	1
	KPSGSPDLWKLSPDQR	1	1	1	Q96JM3	S5(Phospho); S12(Phospho)	1970.88	0.001	0.001086	High	25.72	0.242465							1
	TAPTLSPEHWK	1	1	1	Q96JM3	S6(Phospho)	1346.61	0.002	0.1137				High	13.69	2.9737				0
	KPGPPLSPEIRSPAGSPELR	1	1	1	Q96JM3	S7(Phospho); S12(Phospho); S16(Phospho)	2325.05	0.009	0.08509	High	15.74	2.75887							1
Q9H3N1	Thioredoxin-related transmembrane protein 1 OS=Homo sapiens OX=9606 GN=TMX1 PE=1 SV=1 - [TMX1_HUMAN]	7.5	1	1	1	4	116.6	7.5	1	2					110.86	7.5	1	2	280	31.7708	4.98291
	Sequence	# PSMs	# Proteins	# Protein Groups	Protein Group Accessions	Modifications	MH+ [Da]	q-Value	PEP	A2	IonScore A2	Exp Value A2	B2	IonScore B2	Exp Value B2	C2	IonScore C2	Exp Value C2	# Missed Cleavages
	KVEEEQEADEEDVSEEEAESK	4	1	1	Q9H3N1	S14(Phospho)	2517.98	0	1.277e-16	High	72.59	3.04872e-06				High	81.35	3.67878e-07	1
X6RJP6	Transgelin-2 (Fragment) OS=Homo sapiens OX=9606 GN=TAGLN2 PE=1 SV=1 - [X6RJP6_HUMAN]	7.49	2	1	1	1	20.02	7.49	1	1									187	21.0725	7.81104
	Sequence	# PSMs	# Proteins	# Protein Groups	Protein Group Accessions	Modifications	MH+ [Da]	q-Value	PEP	A2	IonScore A2	Exp Value A2	B2	IonScore B2	Exp Value B2	C2	IonScore C2	Exp Value C2	# Missed Cleavages
	DDGLFSGDPNWFPK	1	2	1	X6RJP6		1594.72	0	0.0004671	High	20.02	0.713706							0
H7C152	Uncharacterized protein (Fragment) OS=Homo sapiens OX=9606 PE=1 SV=1 - [H7C152_HUMAN]	7.45	2	1	1	1					65.74	7.45	1	1					255	26.9592	6.16357
	Sequence	# PSMs	# Proteins	# Protein Groups	Protein Group Accessions	Modifications	MH+ [Da]	q-Value	PEP	A2	IonScore A2	Exp Value A2	B2	IonScore B2	Exp Value B2	C2	IonScore C2	Exp Value C2	# Missed Cleavages
	RESDESGESAPDEGGEGAR	1	2	1	H7C152	S3(Phospho)	2014.76	0	0.00302				High	65.74	1.02007e-05				1
H7C3B5	Genetic suppressor element 1 (Fragment) OS=Homo sapiens OX=9606 GN=GSE1 PE=1 SV=1 - [H7C3B5_HUMAN]	7.4	3	1	1	1					21.07	7.4	1	1					419	46.5406	6.97607
	Sequence	# PSMs	# Proteins	# Protein Groups	Protein Group Accessions	Modifications	MH+ [Da]	q-Value	PEP	A2	IonScore A2	Exp Value A2	B2	IonScore B2	Exp Value B2	C2	IonScore C2	Exp Value C2	# Missed Cleavages
	KGPPTQELDRDSEEEEEEDDEDGEDEEEVPK	1	3	1	H7C3B5	S12(Phospho)	3683.43	0.007	0.2251				High	21.07	0.434585				2
P05141	ADP/ATP translocase 2 OS=Homo sapiens OX=9606 GN=SLC25A5 PE=1 SV=7 - [ADT2_HUMAN]	7.38	1	2	2	2					43.89	7.38	2	2					298	32.8312	9.68604
	Sequence	# PSMs	# Proteins	# Protein Groups	Protein Group Accessions	Modifications	MH+ [Da]	q-Value	PEP	A2	IonScore A2	Exp Value A2	B2	IonScore B2	Exp Value B2	C2	IonScore C2	Exp Value C2	# Missed Cleavages
	DFLAGGVAAAISK	1	1	1	P05141		1219.67	0	0.003944				High	43.89	0.00239071				0
	EQGVLSFWR	1	1	1	P05141		1121.57	0.002	0.1314				High	16.26	1.64195				0
F5GXU9	2-oxoisovalerate dehydrogenase subunit alpha (Fragment) OS=Homo sapiens OX=9606 GN=BCKDHA PE=1 SV=1 - [F5GXU9_HUMAN]	7.32	3	3	3	5	31.26	7.32	2	3	35.73	4.27	1	2					328	36.1409	7.1958
	Sequence	# PSMs	# Proteins	# Protein Groups	Protein Group Accessions	Modifications	MH+ [Da]	q-Value	PEP	A2	IonScore A2	Exp Value A2	B2	IonScore B2	Exp Value B2	C2	IonScore C2	Exp Value C2	# Missed Cleavages
	IGHHSTSDDSSAYRSVDEVNYWDK	2	3	1	F5GXU9	T6(Phospho); S15(Phospho)	2928.16	0	3.936e-16	High	30.91	0.0510095							1
	IGHHSTSDDSSAYR	2	3	1	F5GXU9	T6(Phospho)	1612.64	0	0.0358				High	35.73	0.0125899				0
	SVDEVNYWDK	1	3	1	F5GXU9	S1(Phospho)	1334.53	0.001	0.001827	High	16.35	0.843532							0
A0A0C4DFZ1	Syntaxin-1A OS=Homo sapiens OX=9606 GN=STX1A PE=1 SV=1 - [A0A0C4DFZ1_HUMAN]	7.31	3	2	2	4	86.4097	7.31	2	3					31.7	7.31	1	1	260	29.5546	4.86865
	Sequence	# PSMs	# Proteins	# Protein Groups	Protein Group Accessions	Modifications	MH+ [Da]	q-Value	PEP	A2	IonScore A2	Exp Value A2	B2	IonScore B2	Exp Value B2	C2	IonScore C2	Exp Value C2	# Missed Cleavages
	TAKDSDDDDDVAVTVDR	1	3	1	A0A0C4DFZ1	S5(Phospho)	1916.77	0	3.936e-16	High	62.21	3.57698e-05							1
	TAKDSDDDDDVAVTVDRDR	3	3	1	A0A0C4DFZ1	S5(Phospho)	2187.91	0	1.99e-07	High	38.96	0.00918625				High	31.7	0.0474948	2
Q8WWA1	Transmembrane protein 40 OS=Homo sapiens OX=9606 GN=TMEM40 PE=1 SV=2 - [TMM40_HUMAN]	7.3	1	2	2	3	52.65	7.3	2	2	21.79	6.87	1	1					233	25.4793	5.59229
	Sequence	# PSMs	# Proteins	# Protein Groups	Protein Group Accessions	Modifications	MH+ [Da]	q-Value	PEP	A2	IonScore A2	Exp Value A2	B2	IonScore B2	Exp Value B2	C2	IonScore C2	Exp Value C2	# Missed Cleavages
	RGSDPASGEVEASQLR	2	1	1	Q8WWA1	S3(Phospho)	1738.78	0	3.936e-16	High	52.65	0.000489197	High	21.79	0.584075				1
	RRGSDPASGEVEASQLR	1	1	1	Q8WWA1	S4(Phospho)	1894.88	0.005	0.01384	High	17.86	1.6851							2
J3QRU8	ARF GTPase-activating protein GIT1 OS=Homo sapiens OX=9606 GN=GIT1 PE=1 SV=1 - [J3QRU8_HUMAN]	7.2	4	2	2	5	110.953	7.2	2	4					24.76	3.46	1	1	694	76.7588	6.50732
	Sequence	# PSMs	# Proteins	# Protein Groups	Protein Group Accessions	Modifications	MH+ [Da]	q-Value	PEP	A2	IonScore A2	Exp Value A2	B2	IonScore B2	Exp Value B2	C2	IonScore C2	Exp Value C2	# Missed Cleavages
	SQSDLDDQHDYDSVASDEDTDQEPLR	1	3	1	J3QRU8	S16(Phospho)	3060.19	0	3.936e-16	High	52.96	0.000313105							0
	HGSGADSDYENTQSGDPLLGLEGK	3	4	1	J3QRU8	S3(Phospho)	2527.06	0	3.936e-16	High	50.71	0.000703546				High	24.76	0.264348	0
	HGSGADSDYENTQSGDPLLGLEGK	1	4	1	J3QRU8	S3(Phospho); S7(Phospho)	2607.03	0.001	0.0009097	High	14.34	2.24191							0
H0YNE5	Regulator of microtubule dynamics protein 3 (Fragment) OS=Homo sapiens OX=9606 GN=RMDN3 PE=1 SV=1 - [H0YNE5_HUMAN]	7.17	3	1	1	1	25.27	7.17	1	1									251	27.4063	10.0522
	Sequence	# PSMs	# Proteins	# Protein Groups	Protein Group Accessions	Modifications	MH+ [Da]	q-Value	PEP	A2	IonScore A2	Exp Value A2	B2	IonScore B2	Exp Value B2	C2	IonScore C2	Exp Value C2	# Missed Cleavages
	SQSLPNSLDYTQTSDPGR	1	3	1	H0YNE5	S3(Phospho)	2045.88	0	4.926e-10	High	25.27	0.232681							0
A0A0C4DGG1	Protein kinase C and casein kinase substrate in neurons protein 3 (Fragment) OS=Homo sapiens OX=9606 GN=PACSIN3 PE=1 SV=1 - [A0A0C4DGG1_HUMAN]	7.16	2	1	1	1	37.68	7.16	1	1									405	46.4658	6.17627
	Sequence	# PSMs	# Proteins	# Protein Groups	Protein Group Accessions	Modifications	MH+ [Da]	q-Value	PEP	A2	IonScore A2	Exp Value A2	B2	IonScore B2	Exp Value B2	C2	IonScore C2	Exp Value C2	# Missed Cleavages
	DGTAPPPQSPGSPGTGQDEEWSDEESPRK	1	2	1	A0A0C4DGG1	S22(Phospho)	3118.3	0	5.113e-10	High	37.68	0.0135207							1
Q9UN81	LINE-1 retrotransposable element ORF1 protein OS=Homo sapiens OX=9606 GN=L1RE1 PE=1 SV=1 - [LORF1_HUMAN]	7.1	1	2	2	3	51.58	7.1	2	2	20.42	5.62	1	1					338	40.0307	9.51025
	Sequence	# PSMs	# Proteins	# Protein Groups	Protein Group Accessions	Modifications	MH+ [Da]	q-Value	PEP	A2	IonScore A2	Exp Value A2	B2	IonScore B2	Exp Value B2	C2	IonScore C2	Exp Value C2	# Missed Cleavages
	SSSPATEQSWMENDFDELR	2	1	1	Q9UN81	S3(Phospho)	2308.91	0	8.809e-14	High	42.23	0.00315961	High	20.42	0.442109				0
	SSSPATEQSWMENDFDELREEGFR	1	1	1	Q9UN81	S1(Phospho)	2927.2	0	0.0002389	High	28.35	0.112515							1
Q86XP3	ATP-dependent RNA helicase DDX42 OS=Homo sapiens OX=9606 GN=DDX42 PE=1 SV=1 - [DDX42_HUMAN]	7.04	3	3	3	5	52.1367	7.04	3	3	24.97	3.41	1	1	23.3	3.52	1	1	938	102.912	7.02002
	Sequence	# PSMs	# Proteins	# Protein Groups	Protein Group Accessions	Modifications	MH+ [Da]	q-Value	PEP	A2	IonScore A2	Exp Value A2	B2	IonScore B2	Exp Value B2	C2	IonScore C2	Exp Value C2	# Missed Cleavages
	YMAENPTAGVVQEEEEDNLEYDSDGNPIAPTKK	2	3	1	Q86XP3	S23(Phospho)	3733.62	0	1.51e-07	High	34.22	0.0367657				High	23.3	0.435228	1
	YMAENPTAGVVQEEEEDNLEYDSDGNPIAPTK	1	3	1	Q86XP3	S23(Phospho)	3605.52	0	1.765e-10	High	34.22	0.03476							0
	YMAENPTAGVVQEEEEDNLEYDSDGNPIAPTK	1	3	1	Q86XP3	M2(Oxidation); S23(Phospho)	3621.52	0	0.01154				High	24.97	0.274796				0
	ANFDEENAYFEDEEEDSSNVDLPYIPAENSPTR	1	1	1	Q86XP3	T32(Phospho)	3886.59	0.001	0.0009097	High	19.03	1.02646							0
H7BXM6	RNA-binding protein 33 (Fragment) OS=Homo sapiens OX=9606 GN=RBM33 PE=1 SV=1 - [H7BXM6_HUMAN]	7.04	4	2	2	3	42.34	7.04	2	3									284	32.5843	4.25928
	Sequence	# PSMs	# Proteins	# Protein Groups	Protein Group Accessions	Modifications	MH+ [Da]	q-Value	PEP	A2	IonScore A2	Exp Value A2	B2	IonScore B2	Exp Value B2	C2	IonScore C2	Exp Value C2	# Missed Cleavages
	DIKEESDEEEEDDEESGR	2	4	1	H7BXM6	S6(Phospho)	2219.8	0	9.484e-11	High	35.05	0.00858109							1
	DIKEESDEEEEDDEESGRLR	1	4	1	H7BXM6	S6(Phospho)	2488.99	0.001	0.001827	High	24.79	0.207268							2
A0A087WVQ9	Elongation factor 1-alpha 1 OS=Homo sapiens OX=9606 GN=EEF1A1 PE=1 SV=1 - [A0A087WVQ9_HUMAN]	7.03	8	3	3	3	46.8	2.49	1	1	28.04	4.54	2	2					441	47.8529	9.02686
	Sequence	# PSMs	# Proteins	# Protein Groups	Protein Group Accessions	Modifications	MH+ [Da]	q-Value	PEP	A2	IonScore A2	Exp Value A2	B2	IonScore B2	Exp Value B2	C2	IonScore C2	Exp Value C2	# Missed Cleavages
	IGGIGTVPVGR	1	5	1	A0A087WVQ9		1025.61	0	7.487e-15	High	46.8	0.000313394							0
	LPLQDVYK	1	6	1	A0A087WVQ9		975.551	0.002	0.08368				High	25.44	0.147737				0
	YYVTIIDAPGHR	1	6	1	A0A087WVQ9		1404.73	0.003	0.1683				High	28.04	0.110475				0
F6SJA5	Rho guanine nucleotide exchange factor 7 (Fragment) OS=Homo sapiens OX=9606 GN=ARHGEF7 PE=1 SV=1 - [F6SJA5_HUMAN]	6.92	7	1	1	2	28.9	6.92	1	1					29.31	6.92	1	1	130	14.5513	7.92822
	Sequence	# PSMs	# Proteins	# Protein Groups	Protein Group Accessions	Modifications	MH+ [Da]	q-Value	PEP	A2	IonScore A2	Exp Value A2	B2	IonScore B2	Exp Value B2	C2	IonScore C2	Exp Value C2	# Missed Cleavages
	MSGFIYQGK	2	7	1	F6SJA5	S2(Phospho)	1110.47	0	0.0002258	High	28.9	0.0430919				High	29.31	0.038155	0
E7EQB2	Lactotransferrin (Fragment) OS=Homo sapiens OX=9606 GN=LTF PE=1 SV=1 - [E7EQB2_HUMAN]	6.9	3	3	3	6	125.408	6.9	3	3	20.22	2.59	1	1	30.25	4.89	2	2	696	76.5769	8.01611
	Sequence	# PSMs	# Proteins	# Protein Groups	Protein Group Accessions	Modifications	MH+ [Da]	q-Value	PEP	A2	IonScore A2	Exp Value A2	B2	IonScore B2	Exp Value B2	C2	IonScore C2	Exp Value C2	# Missed Cleavages
	DVTVLQNTDGNNNEAWAK	3	3	1	E7EQB2		1988.93	0	3.936e-16	High	83.06	5.43e-07	High	20.22	1.04662	High	30.25	0.09856	0
	SNLCALCIGDEQGENK	2	3	1	E7EQB2	C4(Carbamidomethyl); C7(Carbamidomethyl)	1807.8	0	3.936e-16	High	58.25	0.000140571				High	15.69	2.3902	0
	DSPIQCIQAIAENR	1	3	1	E7EQB2	C6(Carbamidomethyl)	1614.79	0	1.922e-15	High	33.71	0.0366866							0
A2AB27	Guanine nucleotide-binding protein-like 1 (Fragment) OS=Homo sapiens OX=9606 GN=GNL1 PE=1 SV=1 - [A2AB27_HUMAN]	6.82	2	2	2	3	58.1533	6.82	2	3									264	30.9889	7.44482
	Sequence	# PSMs	# Proteins	# Protein Groups	Protein Group Accessions	Modifications	MH+ [Da]	q-Value	PEP	A2	IonScore A2	Exp Value A2	B2	IonScore B2	Exp Value B2	C2	IonScore C2	Exp Value C2	# Missed Cleavages
	REEQTDTSDGESVTHHIR	2	2	1	A2AB27	S8(Phospho)	2176.93	0	3.936e-16	High	42.39	0.00470641							1
	EEQTDTSDGESVTHHIR	1	2	1	A2AB27	T6(Phospho)	2020.83	0	7.545e-07	High	29.36	0.0704537							0
F2Z2Z8	Pre-B-cell leukemia transcription factor-interacting protein 1 OS=Homo sapiens OX=9606 GN=PBXIP1 PE=1 SV=1 - [F2Z2Z8_HUMAN]	6.8	3	1	1	1					24	6.8	1	1					147	15.0961	4.04346
	Sequence	# PSMs	# Proteins	# Protein Groups	Protein Group Accessions	Modifications	MH+ [Da]	q-Value	PEP	A2	IonScore A2	Exp Value A2	B2	IonScore B2	Exp Value B2	C2	IonScore C2	Exp Value C2	# Missed Cleavages
	ALQAPHSPSK	1	3	1	F2Z2Z8	S7(Phospho)	1115.53	0.002	0.128				High	24	0.234684				0
H7C446	Suppressor of SWI4 1 homolog (Fragment) OS=Homo sapiens OX=9606 GN=PPAN PE=1 SV=1 - [H7C446_HUMAN]	6.73	5	1	1	1	23.41	6.73	1	1									208	23.2043	10.8433
	Sequence	# PSMs	# Proteins	# Protein Groups	Protein Group Accessions	Modifications	MH+ [Da]	q-Value	PEP	A2	IonScore A2	Exp Value A2	B2	IonScore B2	Exp Value B2	C2	IonScore C2	Exp Value C2	# Missed Cleavages
	VGGSDEEASGIPSR	1	5	1	H7C446	S9(Phospho)	1440.6	0.009	0.08509	High	23.41	0.233947							0
Q9H7L9	Sin3 histone deacetylase corepressor complex component SDS3 OS=Homo sapiens OX=9606 GN=SUDS3 PE=1 SV=2 - [SDS3_HUMAN]	6.71	1	1	1	1	20.26	6.71	1	1									328	38.1124	5.65576
	Sequence	# PSMs	# Proteins	# Protein Groups	Protein Group Accessions	Modifications	MH+ [Da]	q-Value	PEP	A2	IonScore A2	Exp Value A2	B2	IonScore B2	Exp Value B2	C2	IonScore C2	Exp Value C2	# Missed Cleavages
	RPASPSSPEHLPATPAESPAQR	1	1	1	Q9H7L9	S4(Phospho); S6(Phospho)	2443.08	0	3.936e-16	High	20.26	0.993223							0
Q9H1C4	Protein unc-93 homolog B1 OS=Homo sapiens OX=9606 GN=UNC93B1 PE=1 SV=2 - [UN93B_HUMAN]	6.7	1	1	1	5	79.92	6.7	1	5									597	66.5883	6.96143
	Sequence	# PSMs	# Proteins	# Protein Groups	Protein Group Accessions	Modifications	MH+ [Da]	q-Value	PEP	A2	IonScore A2	Exp Value A2	B2	IonScore B2	Exp Value B2	C2	IonScore C2	Exp Value C2	# Missed Cleavages
	YLEEDNSDESDAEGEHGDGAEEEAPPAGPRPGPEPAGLGR	5	1	1	Q9H1C4	S7(Phospho); S10(Phospho)	4263.7	0	5.188e-16	High	68.63	8.945e-06							0
P07305	Histone H1.0 OS=Homo sapiens OX=9606 GN=H1-0 PE=1 SV=3 - [H10_HUMAN]	6.7	1	1	1	1					24.73	6.7	1	1					194	20.8502	10.8433
	Sequence	# PSMs	# Proteins	# Protein Groups	Protein Group Accessions	Modifications	MH+ [Da]	q-Value	PEP	A2	IonScore A2	Exp Value A2	B2	IonScore B2	Exp Value B2	C2	IonScore C2	Exp Value C2	# Missed Cleavages
	YSDMIVAAIQAEK	1	1	1	P07305		1438.72	0	0.02969				High	24.73	0.285698				0
H0Y9Z8	Condensin complex subunit 3 (Fragment) OS=Homo sapiens OX=9606 GN=NCAPG PE=1 SV=1 - [H0Y9Z8_HUMAN]	6.69	2	1	1	3	23.84	6.69	1	3									269	30.2552	5.10986
	Sequence	# PSMs	# Proteins	# Protein Groups	Protein Group Accessions	Modifications	MH+ [Da]	q-Value	PEP	A2	IonScore A2	Exp Value A2	B2	IonScore B2	Exp Value B2	C2	IonScore C2	Exp Value C2	# Missed Cleavages
	TLHCEGTEINSDDEQESK	3	2	1	H0Y9Z8	C4(Carbamidomethyl); S11(Phospho)	2171.85	0	5.655e-13	High	23.84	0.198882							0
A0A075B6Q2	Formin-binding protein 1-like (Fragment) OS=Homo sapiens OX=9606 GN=FNBP1L PE=1 SV=1 - [A0A075B6Q2_HUMAN]	6.65	3	1	1	1	36.39	6.65	1	1									451	51.3103	6.44287
	Sequence	# PSMs	# Proteins	# Protein Groups	Protein Group Accessions	Modifications	MH+ [Da]	q-Value	PEP	A2	IonScore A2	Exp Value A2	B2	IonScore B2	Exp Value B2	C2	IonScore C2	Exp Value C2	# Missed Cleavages
	RHSSDINHLVTQGRESPEGSYTDDANQEVR	1	3	1	A0A075B6Q2	S3(Phospho); S16(Phospho)	3557.51	0	4.714e-14	High	36.39	0.0226515							2
O43741	5'-AMP-activated protein kinase subunit beta-2 OS=Homo sapiens OX=9606 GN=PRKAB2 PE=1 SV=1 - [AAKB2_HUMAN]	6.62	1	1	1	1	24.13	6.62	1	1									272	30.2832	6.45557
	Sequence	# PSMs	# Proteins	# Protein Groups	Protein Group Accessions	Modifications	MH+ [Da]	q-Value	PEP	A2	IonScore A2	Exp Value A2	B2	IonScore B2	Exp Value B2	C2	IonScore C2	Exp Value C2	# Missed Cleavages
	DLSSSPPGPYGQEMYAFR	1	1	1	O43741	S5(Phospho)	2081.83	0.005	0.01384	High	24.13	0.218491							0
A0A087WWF4	Kanadaptin (Fragment) OS=Homo sapiens OX=9606 GN=SLC4A1AP PE=1 SV=1 - [A0A087WWF4_HUMAN]	6.59	3	1	1	2	49.4	6.59	1	1					23.78	6.59	1	1	273	30.9591	4.61475
	Sequence	# PSMs	# Proteins	# Protein Groups	Protein Group Accessions	Modifications	MH+ [Da]	q-Value	PEP	A2	IonScore A2	Exp Value A2	B2	IonScore B2	Exp Value B2	C2	IonScore C2	Exp Value C2	# Missed Cleavages
	NWEDEDFYDSDDDTFLDR	2	3	1	A0A087WWF4	S10(Phospho)	2376.85	0	3.936e-16	High	49.4	0.000335835				High	23.78	0.101139	0
Q8IWS0	PHD finger protein 6 OS=Homo sapiens OX=9606 GN=PHF6 PE=1 SV=1 - [PHF6_HUMAN]	6.58	1	1	1	2	35.86	6.58	1	2									365	41.264	8.67529
	Sequence	# PSMs	# Proteins	# Protein Groups	Protein Group Accessions	Modifications	MH+ [Da]	q-Value	PEP	A2	IonScore A2	Exp Value A2	B2	IonScore B2	Exp Value B2	C2	IonScore C2	Exp Value C2	# Missed Cleavages
	TAHNSEADLEESFNEHELEPSSPK	2	1	1	Q8IWS0	S22(Phospho)	2777.16	0	3.936e-16	High	34.05	0.0317398							0
Q9Y5J1	U3 small nucleolar RNA-associated protein 18 homolog OS=Homo sapiens OX=9606 GN=UTP18 PE=1 SV=3 - [UTP18_HUMAN]	6.47	1	3	3	3	40.29	3.24	1	1	30.44	6.47	2	2					556	61.9644	8.76318
	Sequence	# PSMs	# Proteins	# Protein Groups	Protein Group Accessions	Modifications	MH+ [Da]	q-Value	PEP	A2	IonScore A2	Exp Value A2	B2	IonScore B2	Exp Value B2	C2	IonScore C2	Exp Value C2	# Missed Cleavages
	KTSSDDESEEDEDDLLQR	1	1	1	Q9Y5J1	S4(Phospho); S8(Phospho)	2270.83	0	3.936e-16	High	40.29	0.00361534							1
	VQEHEDSGDSEVENEAK	1	1	1	Q9Y5J1	S7(Phospho); S10(Phospho)	2061.74	0	0.01821				High	30.44	0.0247148				0
	RKTSSDDESEEDEDDLLQR	1	1	1	Q9Y5J1	S4(Phospho); S5(Phospho); S9(Phospho)	2506.89	0	0.0283				High	15.9	0.665733				2
P19105	Myosin regulatory light chain 12A OS=Homo sapiens OX=9606 GN=MYL12A PE=1 SV=2 - [ML12A_HUMAN]	6.43	3	1	1	1	31.05	6.43	1	1									171	19.7815	4.80518
	Sequence	# PSMs	# Proteins	# Protein Groups	Protein Group Accessions	Modifications	MH+ [Da]	q-Value	PEP	A2	IonScore A2	Exp Value A2	B2	IonScore B2	Exp Value B2	C2	IonScore C2	Exp Value C2	# Missed Cleavages
	FTDEEVDELYR	1	3	1	P19105		1415.63	0	2.109e-05	High	31.05	0.0560266							0
Q5SYQ7	Retinal dehydrogenase 1 (Fragment) OS=Homo sapiens OX=9606 GN=ALDH1A1 PE=1 SV=1 - [Q5SYQ7_HUMAN]	6.4	4	1	1	1									24.7	6.4	1	1	203	22.6396	6.03662
	Sequence	# PSMs	# Proteins	# Protein Groups	Protein Group Accessions	Modifications	MH+ [Da]	q-Value	PEP	A2	IonScore A2	Exp Value A2	B2	IonScore B2	Exp Value B2	C2	IonScore C2	Exp Value C2	# Missed Cleavages
	TIPIDGNFFTYTR	1	4	1	Q5SYQ7		1544.77	0	0.0004611							High	24.7	0.292253	0
O60678	Protein arginine N-methyltransferase 3 OS=Homo sapiens OX=9606 GN=PRMT3 PE=1 SV=4 - [ANM3_HUMAN]	6.21	1	1	1	1	29.34	6.21	1	1									531	59.8648	5.35107
	Sequence	# PSMs	# Proteins	# Protein Groups	Protein Group Accessions	Modifications	MH+ [Da]	q-Value	PEP	A2	IonScore A2	Exp Value A2	B2	IonScore B2	Exp Value B2	C2	IonScore C2	Exp Value C2	# Missed Cleavages
	GAVENEEDLPELSDSGDEAAWEDEDDADLPHGK	1	1	1	O60678	S13(Phospho); S15(Phospho)	3714.42	0	8.55e-06	High	29.34	0.0554706							0
S4R3V8	Lipolysis-stimulated lipoprotein receptor OS=Homo sapiens OX=9606 GN=LSR PE=1 SV=2 - [S4R3V8_HUMAN]	6.16	2	2	2	4	32.1	6.16	2	3					21.91	2.66	1	1	601	66.1343	7.02002
	Sequence	# PSMs	# Proteins	# Protein Groups	Protein Group Accessions	Modifications	MH+ [Da]	q-Value	PEP	A2	IonScore A2	Exp Value A2	B2	IonScore B2	Exp Value B2	C2	IonScore C2	Exp Value C2	# Missed Cleavages
	ARSVDALDDLTPPSTAESGSR	2	2	1	S4R3V8	S3(Phospho)	2225.01	0	2.232e-08	High	32.1	0.0573742							1
	SRDDLYDQDDSRDFPR	2	2	1	S4R3V8	S1(Phospho)	2079.84	0.001	0.001827	High	10.76	5.04935				High	21.91	0.37394	2
F8WC89	SAC3 domain-containing protein 1 OS=Homo sapiens OX=9606 GN=SAC3D1 PE=1 SV=1 - [F8WC89_HUMAN]	6.15	2	1	1	1	31.51	6.15	1	1									358	38.5562	7.62061
	Sequence	# PSMs	# Proteins	# Protein Groups	Protein Group Accessions	Modifications	MH+ [Da]	q-Value	PEP	A2	IonScore A2	Exp Value A2	B2	IonScore B2	Exp Value B2	C2	IonScore C2	Exp Value C2	# Missed Cleavages
	TLEEVVMAEEEDEGTDRPGSPA	1	2	1	F8WC89	S20(Phospho)	2441.01	0	0.0009097	High	31.51	0.051208							0
Q9NR30	Nucleolar RNA helicase 2 OS=Homo sapiens OX=9606 GN=DDX21 PE=1 SV=5 - [DDX21_HUMAN]	6.13	1	2	2	5	52.33	1.92	1	2	0	4.21	1	1	25.8	1.92	1	2	783	87.2904	9.27588
	Sequence	# PSMs	# Proteins	# Protein Groups	Protein Group Accessions	Modifications	MH+ [Da]	q-Value	PEP	A2	IonScore A2	Exp Value A2	B2	IonScore B2	Exp Value B2	C2	IonScore C2	Exp Value C2	# Missed Cleavages
	NEEPSEEEIDAPKPK	4	1	1	Q9NR30	S5(Phospho)	1791.77	0	3.936e-16	High	53.64	0.000327629				High	25.8	0.198454	0
	NGFPHPEPDCNPSEAASEESNSEIEQEIPVEQK	1	1	1	Q9NR30	C10(Carbamidomethyl); S20(Phospho)	3774.59	0.004	0.1843				High	14.73	2.99495				0
P35579	Myosin-9 OS=Homo sapiens OX=9606 GN=MYH9 PE=1 SV=4 - [MYH9_HUMAN]	6.12	1	7	9	22	256.358	3.88	5	11	63.7333	2.96	4	4	121.447	3.16	3	7	1960	226.392	5.60498
	Sequence	# PSMs	# Proteins	# Protein Groups	Protein Group Accessions	Modifications	MH+ [Da]	q-Value	PEP	A2	IonScore A2	Exp Value A2	B2	IonScore B2	Exp Value B2	C2	IonScore C2	Exp Value C2	# Missed Cleavages
	IAQLEEELEEEQGNTELINDR	4	1	1	P35579		2472.18	0	3.936e-16	High	92.07	6.89785e-08				High	50.78	0.00090454	0
	KGAGDGSDEEVDGKADGAEAKPAE	10	1	1	P35579	S7(Phospho)	2383	0	3.936e-16	High	60.97	6.42667e-05				High	55.67	0.000203535	2
	GAGDGSDEEVDGKADGAEAKPAE	1	1	1	P35579	S6(Phospho)	2254.9	0	5.523e-08	High	42	0.00374473							1
	DFSALESQLQDTQELLQEENR	1	1	1	P35579		2493.18	0	5.658e-10	High	32.98	0.0541767							0
	IAQLEEQLDNETK	1	1	1	P35579		1530.77	0	0.001825				High	51.85	0.000500951				0
	TQLEELEDELQATEDAK	2	2	2	P35579;P35580		1961.92	0	0.007387				High	30.74	0.080918	High	18.84	1.24543	0
	IAEFTTNLTEEEEK	1	1	1	P35579		1653.79	0	0.02046				High	29.81	0.0999275				0
	KGAGDGSDEEVDGK	1	1	1	P35579	S7(Phospho)	1443.57	0.002	0.1245				High	21.81	0.23961				1
	DLGEELEALK	1	2	2	P35579;P35749		1116.58	0.006	0.02097	High	19.75	0.735652							0
Q96QR8	Transcriptional activator protein Pur-beta OS=Homo sapiens OX=9606 GN=PURB PE=1 SV=3 - [PURB_HUMAN]	6.09	1	1	1	1					76.21	6.09	1	1					312	33.2205	5.42725
	Sequence	# PSMs	# Proteins	# Protein Groups	Protein Group Accessions	Modifications	MH+ [Da]	q-Value	PEP	A2	IonScore A2	Exp Value A2	B2	IonScore B2	Exp Value B2	C2	IonScore C2	Exp Value C2	# Missed Cleavages
	RGGGSGGGEESEGEEVDED	1	1	1	Q96QR8	S11(Phospho)	1931.68	0	0.004249				High	76.21	5.40889e-07				1
Q9BU76	Multiple myeloma tumor-associated protein 2 OS=Homo sapiens OX=9606 GN=MMTAG2 PE=1 SV=1 - [MMTA2_HUMAN]	6.08	1	1	1	1					31.19	6.08	1	1					263	29.3939	10.0229
	Sequence	# PSMs	# Proteins	# Protein Groups	Protein Group Accessions	Modifications	MH+ [Da]	q-Value	PEP	A2	IonScore A2	Exp Value A2	B2	IonScore B2	Exp Value B2	C2	IonScore C2	Exp Value C2	# Missed Cleavages
	RPAEATSSPTSPERPR	1	1	1	Q9BU76	S11(Phospho)	1818.85	0	0.02619				High	31.19	0.0737136				0
P23284	Peptidyl-prolyl cis-trans isomerase B OS=Homo sapiens OX=9606 GN=PPIB PE=1 SV=2 - [PPIB_HUMAN]	6.02	1	1	1	1	69.28	6.02	1	1									216	23.7275	9.40771
	Sequence	# PSMs	# Proteins	# Protein Groups	Protein Group Accessions	Modifications	MH+ [Da]	q-Value	PEP	A2	IonScore A2	Exp Value A2	B2	IonScore B2	Exp Value B2	C2	IonScore C2	Exp Value C2	# Missed Cleavages
	TVDNFVALATGEK	1	1	1	P23284		1364.71	0	3.936e-16	High	69.28	9.17109e-06							0
Q12874	Splicing factor 3A subunit 3 OS=Homo sapiens OX=9606 GN=SF3A3 PE=1 SV=1 - [SF3A3_HUMAN]	5.99	1	1	1	2					34.45	5.99	1	2					501	58.8123	5.37646
	Sequence	# PSMs	# Proteins	# Protein Groups	Protein Group Accessions	Modifications	MH+ [Da]	q-Value	PEP	A2	IonScore A2	Exp Value A2	B2	IonScore B2	Exp Value B2	C2	IonScore C2	Exp Value C2	# Missed Cleavages
	TGEEREEEEEEQISESESEDEENEIIYNPK	1	1	1	Q12874	S14(Phospho); S16(Phospho); S18(Phospho)	3839.43	0	0.0243				High	34.45	0.0139621				1
	TGEEREEEEEEQISESESEDEENEIIYNPK	1	1	1	Q12874	S16(Phospho); S18(Phospho)	3759.46	0.002	0.09211				High	14	2.0602				1
H0YER1	Remodeling and spacing factor 1 (Fragment) OS=Homo sapiens OX=9606 GN=RSF1 PE=1 SV=1 - [H0YER1_HUMAN]	5.98	3	2	2	4	44.89	5.98	2	2	27.7	5.98	2	2					702	79.1706	4.88135
	Sequence	# PSMs	# Proteins	# Protein Groups	Protein Group Accessions	Modifications	MH+ [Da]	q-Value	PEP	A2	IonScore A2	Exp Value A2	B2	IonScore B2	Exp Value B2	C2	IonScore C2	Exp Value C2	# Missed Cleavages
	DAQRLSPIPEEVPK	2	3	1	H0YER1	S6(Phospho)	1658.82	0.001	0.0009097	High	44.89	0.00301636	High	18.04	1.4573				1
	STLESEKPGSPEAAETSPPSNIIDHCEK	1	3	1	H0YER1	S10(Phospho); C26(Carbamidomethyl)	3090.37	0.002	0.07312				High	26.66	0.236057				0
	STLESEKPGSPEAAETSPPSNIIDHCEK	1	3	1	H0YER1	T16(Phospho); S17(Phospho); C26(Carbamidomethyl)	3170.33	0.007	0.08509	High	12.46	5.13628							0
P14866	Heterogeneous nuclear ribonucleoprotein L OS=Homo sapiens OX=9606 GN=HNRNPL PE=1 SV=2 - [HNRPL_HUMAN]	5.94	1	1	1	1					20.38	5.94	1	1					589	64.0924	8.22119
	Sequence	# PSMs	# Proteins	# Protein Groups	Protein Group Accessions	Modifications	MH+ [Da]	q-Value	PEP	A2	IonScore A2	Exp Value A2	B2	IonScore B2	Exp Value B2	C2	IonScore C2	Exp Value C2	# Missed Cleavages
	TDNAGDQHGGGGGGGGGAGAAGGGGGGENYDDPHK	1	1	1	P14866		2981.21	0.002	0.0566				High	20.38	0.694953				0
P08559	Pyruvate dehydrogenase E1 component subunit alpha, somatic form, mitochondrial OS=Homo sapiens OX=9606 GN=PDHA1 PE=1 SV=3 - [ODPA_HUMAN]	5.9	1	2	2	7	40.6933	5.9	2	4					49.6629	5.9	2	3	390	43.2676	8.06006
	Sequence	# PSMs	# Proteins	# Protein Groups	Protein Group Accessions	Modifications	MH+ [Da]	q-Value	PEP	A2	IonScore A2	Exp Value A2	B2	IonScore B2	Exp Value B2	C2	IonScore C2	Exp Value C2	# Missed Cleavages
	YHGHSMSDPGVSYR	3	1	1	P08559	S5(Phospho)	1672.65	0	3.113e-05	High	33.11	0.0224536				High	38.24	0.00641865	0
	YGMGTSVER	2	1	1	P08559	S6(Phospho)	1079.42	0	7.498e-06	High	24.92	0.124816				High	30.22	0.0327008	0
	YHGHSMSDPGVSYR	2	1	1	P08559	S5(Phospho); S12(Phospho)	1752.61	0.001	0.001335	High	22.31	0.155978				High	31.67	0.0167469	0
Q9BUH6	Protein PAXX OS=Homo sapiens OX=9606 GN=PAXX PE=1 SV=2 - [PAXX_HUMAN]	5.88	1	1	1	1					31.35	5.88	1	1					204	21.626	5.47803
	Sequence	# PSMs	# Proteins	# Protein Groups	Protein Group Accessions	Modifications	MH+ [Da]	q-Value	PEP	A2	IonScore A2	Exp Value A2	B2	IonScore B2	Exp Value B2	C2	IonScore C2	Exp Value C2	# Missed Cleavages
	LAAAEETAVSPR	1	1	1	Q9BUH6	S10(Phospho)	1294.6	0	0.01118				High	31.35	0.0531298				0
P51858	Hepatoma-derived growth factor OS=Homo sapiens OX=9606 GN=HDGF PE=1 SV=1 - [HDGF_HUMAN]	5.83	1	2	2	7	26.77	5.83	2	4					60.9838	5.83	2	3	240	26.7719	4.729
	Sequence	# PSMs	# Proteins	# Protein Groups	Protein Group Accessions	Modifications	MH+ [Da]	q-Value	PEP	A2	IonScore A2	Exp Value A2	B2	IonScore B2	Exp Value B2	C2	IonScore C2	Exp Value C2	# Missed Cleavages
	RAGDLLEDSPK	4	1	1	P51858	S9(Phospho)	1280.58	0	4.23e-05	High	28.38	0.0943873				High	49.9	0.000622162	1
	AGDLLEDSPKRPK	3	1	1	P51858	S8(Phospho)	1505.74	0	0.0009097	High	26.77	0.177874				High	28.6	0.115262	1
P13521	Secretogranin-2 OS=Homo sapiens OX=9606 GN=SCG2 PE=1 SV=2 - [SCG2_HUMAN]	5.83	1	2	2	5	63.52	3.73	1	2	65.34	2.11	1	2	26.57	2.11	1	1	617	70.897	4.75439
	Sequence	# PSMs	# Proteins	# Protein Groups	Protein Group Accessions	Modifications	MH+ [Da]	q-Value	PEP	A2	IonScore A2	Exp Value A2	B2	IonScore B2	Exp Value B2	C2	IonScore C2	Exp Value C2	# Missed Cleavages
	RVPGQGSSEDDLQEEEQIEQAIK	2	1	1	P13521	S7(Phospho)	2665.2	0	3.936e-16	High	46.86	0.00228318							1
	IESQTQEEVRDSK	3	1	1	P13521	S12(Phospho)	1628.71	0.001	0.009092				High	50.06	0.0007979	High	26.57	0.173811	1
O60884	DnaJ homolog subfamily A member 2 OS=Homo sapiens OX=9606 GN=DNAJA2 PE=1 SV=1 - [DNJA2_HUMAN]	5.83	1	1	1	1					20.55	5.83	1	1					412	45.7166	6.48096
	Sequence	# PSMs	# Proteins	# Protein Groups	Protein Group Accessions	Modifications	MH+ [Da]	q-Value	PEP	A2	IonScore A2	Exp Value A2	B2	IonScore B2	Exp Value B2	C2	IonScore C2	Exp Value C2	# Missed Cleavages
	EAYNDSSDEESSSHHGPGVQCAHQ	1	1	1	O60884	S6(Phospho); S7(Phospho); C21(Carbamidomethyl)	2787.97	0	0.02026				High	20.55	0.216738				0
A0A1W2PP04	RNA-binding motif protein, X-linked 2 OS=Homo sapiens OX=9606 GN=RBMX2 PE=1 SV=1 - [A0A1W2PP04_HUMAN]	5.8	2	1	1	1					28.49	5.8	1	1					276	31.5033	9.40771
	Sequence	# PSMs	# Proteins	# Protein Groups	Protein Group Accessions	Modifications	MH+ [Da]	q-Value	PEP	A2	IonScore A2	Exp Value A2	B2	IonScore B2	Exp Value B2	C2	IonScore C2	Exp Value C2	# Missed Cleavages
	ADREVQAEQPSSSSPR	1	2	1	A0A1W2PP04	S12(Phospho)	1823.79	0.004	0.1728				High	28.49	0.108591				1
M0QY38	Troponin T, slow skeletal muscle (Fragment) OS=Homo sapiens OX=9606 GN=TNNT1 PE=1 SV=1 - [M0QY38_HUMAN]	5.77	1	1	1	1					0	5.77	1	1					104	11.9801	7.44482
	Sequence	# PSMs	# Proteins	# Protein Groups	Protein Group Accessions	Modifications	MH+ [Da]	q-Value	PEP	A2	IonScore A2	Exp Value A2	B2	IonScore B2	Exp Value B2	C2	IonScore C2	Exp Value C2	# Missed Cleavages
	LALSPR	1	1	1	M0QY38	S4(Phospho)	736.375	0.007	0.2241				High	26.4	0.106296				0
Q13263	Transcription intermediary factor 1-beta OS=Homo sapiens OX=9606 GN=TRIM28 PE=1 SV=5 - [TIF1B_HUMAN]	5.75	2	2	2	6	38.99	5.75	2	2	27.05	5.75	2	3	36.68	1.56	1	1	835	88.4934	5.77002
	Sequence	# PSMs	# Proteins	# Protein Groups	Protein Group Accessions	Modifications	MH+ [Da]	q-Value	PEP	A2	IonScore A2	Exp Value A2	B2	IonScore B2	Exp Value B2	C2	IonScore C2	Exp Value C2	# Missed Cleavages
	SRSGEGEVSGLMR	3	2	1	Q13263	S3(Phospho)	1444.63	0	3.936e-16	High	38.99	0.00803153	High	14	2.58372	High	36.68	0.0125541	1
	QGSGSSQPMEVQEGYGFGSGDDPYSSAEPHVSGVK	2	1	1	Q13263	S6(Phospho)	3637.51	0.001	0.001827	High	12.16	5.4793	High	18.23	1.34381				0
	QGSGSSQPMEVQEGYGFGSGDDPYSSAEPHVSGVK	1	1	1	Q13263	S3(Phospho); M9(Oxidation)	3653.51	0.002	0.05904				High	27.05	0.156808				0
D6RFF0	La ribonucleoprotein domain family member 7 (Fragment) OS=Homo sapiens OX=9606 GN=LARP7 PE=1 SV=1 - [D6RFF0_HUMAN]	5.69	3	1	1	2					21.75	5.69	1	1	24.63	5.69	1	1	299	34.4273	9.78857
	Sequence	# PSMs	# Proteins	# Protein Groups	Protein Group Accessions	Modifications	MH+ [Da]	q-Value	PEP	A2	IonScore A2	Exp Value A2	B2	IonScore B2	Exp Value B2	C2	IonScore C2	Exp Value C2	# Missed Cleavages
	SRPTSEGSDIESTEPQK	1	3	1	D6RFF0	S5(Phospho); S8(Phospho)	2007.8	0	0.0275				High	21.75	0.355559				0
	SRPTSEGSDIESTEPQK	1	3	1	D6RFF0	S8(Phospho)	1927.82	0	0.001335							High	24.63	0.253097	0
Q9UK55	Protein Z-dependent protease inhibitor OS=Homo sapiens OX=9606 GN=SERPINA10 PE=1 SV=1 - [ZPI_HUMAN]	5.63	2	1	1	1	30.04	5.63	1	1									444	50.6742	8.26514
	Sequence	# PSMs	# Proteins	# Protein Groups	Protein Group Accessions	Modifications	MH+ [Da]	q-Value	PEP	A2	IonScore A2	Exp Value A2	B2	IonScore B2	Exp Value B2	C2	IonScore C2	Exp Value C2	# Missed Cleavages
	VVQAPKEEEEDEQEASEEKASEEEK	1	2	1	Q9UK55	S16(Phospho); S21(Phospho)	3036.22	0.001	0.01384	High	30.04	0.0679215							2
G3V578	N-myc downstream-regulated gene 2 protein OS=Homo sapiens OX=9606 GN=NDRG2 PE=1 SV=1 - [G3V578_HUMAN]	5.63	4	1	1	1	23.31	5.63	1	1									284	31.0733	5.41455
	Sequence	# PSMs	# Proteins	# Protein Groups	Protein Group Accessions	Modifications	MH+ [Da]	q-Value	PEP	A2	IonScore A2	Exp Value A2	B2	IonScore B2	Exp Value B2	C2	IonScore C2	Exp Value C2	# Missed Cleavages
	SRTASLTSAASVDGNR	1	4	1	G3V578	T3(Phospho); S5(Phospho)	1752.73	0	4.671e-11	High	23.31	0.293762							1
C9JKY3	Epithelial cell adhesion molecule (Fragment) OS=Homo sapiens OX=9606 GN=EPCAM PE=1 SV=1 - [C9JKY3_HUMAN]	5.53	3	1	1	1	51.91	5.53	1	1									199	20.9403	9.27588
	Sequence	# PSMs	# Proteins	# Protein Groups	Protein Group Accessions	Modifications	MH+ [Da]	q-Value	PEP	A2	IonScore A2	Exp Value A2	B2	IonScore B2	Exp Value B2	C2	IonScore C2	Exp Value C2	# Missed Cleavages
	LAVNCFVNNNR	1	3	1	C9JKY3	C5(Carbamidomethyl)	1320.65	0	1.112e-10	High	51.91	0.000469599							0
F8W787	Cathepsin D (Fragment) OS=Homo sapiens OX=9606 GN=CTSD PE=1 SV=1 - [F8W787_HUMAN]	5.53	12	1	1	1					29.88	5.53	1	1					199	21.4767	5.79541
	Sequence	# PSMs	# Proteins	# Protein Groups	Protein Group Accessions	Modifications	MH+ [Da]	q-Value	PEP	A2	IonScore A2	Exp Value A2	B2	IonScore B2	Exp Value B2	C2	IonScore C2	Exp Value C2	# Missed Cleavages
	FDGILGMAYPR	1	12	1	F8W787		1239.62	0.002	0.06684				High	29.88	0.0882552				0
A0A0A0MSM0	Heat shock protein 105 kDa OS=Homo sapiens OX=9606 GN=HSPH1 PE=1 SV=1 - [A0A0A0MSM0_HUMAN]	5.5	2	1	1	1	41.03	5.5	1	1									782	88.7857	5.60498
	Sequence	# PSMs	# Proteins	# Protein Groups	Protein Group Accessions	Modifications	MH+ [Da]	q-Value	PEP	A2	IonScore A2	Exp Value A2	B2	IonScore B2	Exp Value B2	C2	IonScore C2	Exp Value C2	# Missed Cleavages
	NVQQDNSEAGTQPQVQTDAQQTSQSPPSPELTSEENKIPDADK	1	2	1	A0A0A0MSM0	S28(Phospho)	4717.1	0	3.936e-16	High	41.03	0.00699324							1
Q13242	Serine/arginine-rich splicing factor 9 OS=Homo sapiens OX=9606 GN=SRSF9 PE=1 SV=1 - [SRSF9_HUMAN]	5.43	1	1	1	5	26.62	5.43	1	2					25.08	5.43	1	3	221	25.5264	8.646
	Sequence	# PSMs	# Proteins	# Protein Groups	Protein Group Accessions	Modifications	MH+ [Da]	q-Value	PEP	A2	IonScore A2	Exp Value A2	B2	IonScore B2	Exp Value B2	C2	IonScore C2	Exp Value C2	# Missed Cleavages
	GSPHYFSPFRPY	2	1	1	Q13242	S2(Phospho)	1534.65	0	0.0009097	High	26.62	0.138502				High	15.4	1.81982	0
	GSPHYFSPFRPY	3	1	1	Q13242	S2(Phospho); S7(Phospho)	1614.61	0	0.001335	High	15.85	0.97506				High	24	0.133764	0
P05455	Lupus La protein OS=Homo sapiens OX=9606 GN=SSB PE=1 SV=2 - [LA_HUMAN]	5.39	1	2	2	6	65.2967	5.39	2	4					47.204	4.9	1	2	408	46.8082	7.12256
	Sequence	# PSMs	# Proteins	# Protein Groups	Protein Group Accessions	Modifications	MH+ [Da]	q-Value	PEP	A2	IonScore A2	Exp Value A2	B2	IonScore B2	Exp Value B2	C2	IonScore C2	Exp Value C2	# Missed Cleavages
	FASDDEHDEHDENGATGPVK	5	1	1	P05455	S3(Phospho)	2249.87	0	3.936e-16	High	56.84	9.05687e-05				High	45.84	0.00105158	0
	TKFASDDEHDEHDENGATGPVK	1	1	1	P05455	S5(Phospho)	2479.01	0	3.936e-16	High	21.86	0.433985							1
F8VZY9	Keratin, type I cytoskeletal 18 OS=Homo sapiens OX=9606 GN=KRT18 PE=1 SV=1 - [F8VZY9_HUMAN]	5.37	2	2	2	2	36.7902	5.37	2	2									391	43.7474	5.35107
	Sequence	# PSMs	# Proteins	# Protein Groups	Protein Group Accessions	Modifications	MH+ [Da]	q-Value	PEP	A2	IonScore A2	Exp Value A2	B2	IonScore B2	Exp Value B2	C2	IonScore C2	Exp Value C2	# Missed Cleavages
	QAQEYEALLNIK	1	2	1	F8VZY9		1419.75	0	9.749e-12	High	34.24	0.0262374							0
	IVLQIDNAR	1	2	1	F8VZY9		1041.61	0	4.101e-05	High	27.77	0.0434484							0
Q9C0E8	Endoplasmic reticulum junction formation protein lunapark OS=Homo sapiens OX=9606 GN=LNPK PE=1 SV=2 - [LNP_HUMAN]	5.37	1	1	1	1	32.6	5.37	1	1									428	47.7102	5.10986
	Sequence	# PSMs	# Proteins	# Protein Groups	Protein Group Accessions	Modifications	MH+ [Da]	q-Value	PEP	A2	IonScore A2	Exp Value A2	B2	IonScore B2	Exp Value B2	C2	IonScore C2	Exp Value C2	# Missed Cleavages
	IPATEQTNQVIEKASDSEEPEEK	1	1	1	Q9C0E8	S15(Phospho)	2652.19	0	4.72e-12	High	32.6	0.056273							1
P02649	Apolipoprotein E OS=Homo sapiens OX=9606 GN=APOE PE=1 SV=1 - [APOE_HUMAN]	5.36	1	1	1	2	50.5	5.36	1	1					41.81	5.36	1	1	317	36.1318	5.73193
	Sequence	# PSMs	# Proteins	# Protein Groups	Protein Group Accessions	Modifications	MH+ [Da]	q-Value	PEP	A2	IonScore A2	Exp Value A2	B2	IonScore B2	Exp Value B2	C2	IonScore C2	Exp Value C2	# Missed Cleavages
	VQAAVGTSAAPVPSDNH	2	1	1	P02649		1620.8	0	3.936e-16	High	50.5	0.000778508				High	41.81	0.00594575	0
Q9UKL0	REST corepressor 1 OS=Homo sapiens OX=9606 GN=RCOR1 PE=1 SV=2 - [RCOR1_HUMAN]	5.36	1	1	1	3	96.5064	5.36	1	2					22.57	5.36	1	1	485	53.2946	7.03467
	Sequence	# PSMs	# Proteins	# Protein Groups	Protein Group Accessions	Modifications	MH+ [Da]	q-Value	PEP	A2	IonScore A2	Exp Value A2	B2	IonScore B2	Exp Value B2	C2	IonScore C2	Exp Value C2	# Missed Cleavages
	EREESEDELEEANGNNPIDIEVDQNK	3	1	1	Q9UKL0	S5(Phospho)	3095.3	0	3.936e-16	High	62.97	4.21392e-05				High	22.57	0.419716	1
Q9HCN4	GPN-loop GTPase 1 OS=Homo sapiens OX=9606 GN=GPN1 PE=1 SV=1 - [GPN1_HUMAN]	5.35	1	1	1	1	48.48	5.35	1	1									374	41.7137	4.91943
	Sequence	# PSMs	# Proteins	# Protein Groups	Protein Group Accessions	Modifications	MH+ [Da]	q-Value	PEP	A2	IonScore A2	Exp Value A2	B2	IonScore B2	Exp Value B2	C2	IonScore C2	Exp Value C2	# Missed Cleavages
	GTLDEEDEEADSDTDDIDHR	1	1	1	Q9HCN4	S12(Phospho)	2356.86	0	3.936e-16	High	48.48	0.000483899							0
P13224	Platelet glycoprotein Ib beta chain OS=Homo sapiens OX=9606 GN=GP1BB PE=1 SV=1 - [GP1BB_HUMAN]	5.34	1	1	1	1					30.86	5.34	1	1					206	21.7038	9.30518
	Sequence	# PSMs	# Proteins	# Protein Groups	Protein Group Accessions	Modifications	MH+ [Da]	q-Value	PEP	A2	IonScore A2	Exp Value A2	B2	IonScore B2	Exp Value B2	C2	IonScore C2	Exp Value C2	# Missed Cleavages
	LSLTDPLVAER	1	1	1	P13224	S2(Phospho)	1293.65	0	0.02488				High	30.86	0.0705092				0
O95400	CD2 antigen cytoplasmic tail-binding protein 2 OS=Homo sapiens OX=9606 GN=CD2BP2 PE=1 SV=1 - [CD2B2_HUMAN]	5.28	1	1	1	2					80.9743	5.28	1	2					341	37.6232	4.61475
	Sequence	# PSMs	# Proteins	# Protein Groups	Protein Group Accessions	Modifications	MH+ [Da]	q-Value	PEP	A2	IonScore A2	Exp Value A2	B2	IonScore B2	Exp Value B2	C2	IonScore C2	Exp Value C2	# Missed Cleavages
	HSLDSDEEEDDDDGGSSK	2	1	1	O95400	S5(Phospho)	2016.69	0	0.000779595				High	76.63	3.30251e-07				0
H0YIM6	Kinesin-like protein KIF21A (Fragment) OS=Homo sapiens OX=9606 GN=KIF21A PE=1 SV=1 - [H0YIM6_HUMAN]	5.26	4	1	1	2	121.7	5.26	1	2									475	53.4346	9.30518
	Sequence	# PSMs	# Proteins	# Protein Groups	Protein Group Accessions	Modifications	MH+ [Da]	q-Value	PEP	A2	IonScore A2	Exp Value A2	B2	IonScore B2	Exp Value B2	C2	IonScore C2	Exp Value C2	# Missed Cleavages
	KLSSSDAPAQDTGSSAAAVETDASR	2	4	1	H0YIM6	S5(Phospho)	2502.1	0	3.936e-16	High	103.22	4.62138e-09							1
Q5JRI1	Serine/arginine-rich-splicing factor 10 OS=Homo sapiens OX=9606 GN=SRSF10 PE=1 SV=1 - [Q5JRI1_HUMAN]	5.23	2	2	2	3					0	4.07	1	1	43.97	5.23	1	2	172	20.9005	10.4771
	Sequence	# PSMs	# Proteins	# Protein Groups	Protein Group Accessions	Modifications	MH+ [Da]	q-Value	PEP	A2	IonScore A2	Exp Value A2	B2	IonScore B2	Exp Value B2	C2	IonScore C2	Exp Value C2	# Missed Cleavages
	SRSFDYNYR	2	2	1	Q5JRI1	S1(Phospho); S3(Phospho)	1367.47	0	0.001088							High	32.59	0.0087303	1
	SFDYNYR	1	2	1	Q5JRI1	S1(Phospho)	1044.38	0.002	0.09557				High	22.75	0.104584				0
A0A087X0K9	Tight junction protein ZO-1 OS=Homo sapiens OX=9606 GN=TJP1 PE=1 SV=1 - [A0A087X0K9_HUMAN]	5.19	4	3	3	3					37.16	5.19	3	3					1676	187.734	6.69775
	Sequence	# PSMs	# Proteins	# Protein Groups	Protein Group Accessions	Modifications	MH+ [Da]	q-Value	PEP	A2	IonScore A2	Exp Value A2	B2	IonScore B2	Exp Value B2	C2	IonScore C2	Exp Value C2	# Missed Cleavages
	QPYPSRPPFDNQHSQDLDSR	1	4	1	A0A087X0K9	S14(Phospho)	2464.07	0	0.04227				High	13.34	4.73874				0
	HTSDYEDTDTEGGAYTDQELDETLNDEVGTPPESAITR	1	4	1	A0A087X0K9	S3(Phospho)	4251.77	0.002	0.08652				High	28.32	0.120509				0
	VQIPVSRPDPEPVSDNEEDSYDEEIHDPR	1	4	1	A0A087X0K9	S14(Phospho); S20(Phospho)	3523.47	0.002	0.09084				High	27.84	0.14676				0
P46821	Microtubule-associated protein 1B OS=Homo sapiens OX=9606 GN=MAP1B PE=1 SV=2 - [MAP1B_HUMAN]	5.15	1	7	7	9	58.56	3.53	5	6	39.61	1.62	2	2	20.86	0.85	1	1	2468	270.468	4.80518
	Sequence	# PSMs	# Proteins	# Protein Groups	Protein Group Accessions	Modifications	MH+ [Da]	q-Value	PEP	A2	IonScore A2	Exp Value A2	B2	IonScore B2	Exp Value B2	C2	IonScore C2	Exp Value C2	# Missed Cleavages
	RESVASGDDRAEEDMDEAIEK	3	1	1	P46821	S3(Phospho); S6(Phospho)	2511.96	0	2.516e-05	High	34.43	0.0177044				High	20.86	0.34988	2
	ESVASGDDRAEEDMDEAIEK	1	1	1	P46821	S5(Phospho)	2275.89	0	4.962e-05	High	30.91	0.0400209							1
	FEDEGAGFEESSETGDYEEK	1	1	1	P46821	S12(Phospho)	2334.85	0	2.454e-12	High	27.92	0.0519823							0
	HMDPPPAPVQDRSPSPR	1	1	1	P46821	S13(Phospho); S15(Phospho)	2043.85	0	5.25e-07	High	16.3	1.68081							1
	GEAEQSEEEADEEDKAEDAREEEYEPEK	1	1	1	P46821	S6(Phospho)	3350.29	0	0.02659				High	37.47	0.00994682				2
	VSAEAEVAPVSPEVTQEVVEEHCASPEDK	1	1	1	P46821	C23(Carbamidomethyl); S25(Phospho)	3202.42	0.006	0.04501	High	12.1	6.69622							0
	VQSLEGEKLSPK	1	1	1	P46821	S10(Phospho)	1394.7	0.007	0.2273				High	22.14	0.53152				1
P11388	DNA topoisomerase 2-alpha OS=Homo sapiens OX=9606 GN=TOP2A PE=1 SV=3 - [TOP2A_HUMAN]	5.03	1	6	6	8	93.6905	2.87	4	5	64.96	2.16	2	3					1531	174.276	8.71924
	Sequence	# PSMs	# Proteins	# Protein Groups	Protein Group Accessions	Modifications	MH+ [Da]	q-Value	PEP	A2	IonScore A2	Exp Value A2	B2	IonScore B2	Exp Value B2	C2	IonScore C2	Exp Value C2	# Missed Cleavages
	IKNENTEGSPQEDGVELEGLK	2	1	1	P11388	S9(Phospho)	2366.08	0	3.936e-16	High	46	0.00263748							1
	TQMAEVLPSPR	1	1	1	P11388	S9(Phospho)	1308.6	0	3.587e-06	High	38.98	0.00929581							0
	NENTEGSPQEDGVELEGLK	1	1	1	P11388	S7(Phospho)	2124.9	0	3.936e-16	High	32.75	0.0400552							0
	VPDEEENEESDNEKETEK	2	1	1	P11388	S10(Phospho)	2229.86	0	0.02786				High	44.97	0.00147906				1
	RKPSTSDDSDSNFEK	1	1	1	P11388	S4(Phospho); S6(Phospho); S9(Phospho)	1952.67	0	0.01092				High	19.96	0.199327				1
	SVVSDLEADDVK	1	1	1	P11388	S4(Phospho)	1356.59	0.003	0.01384	High	23.66	0.27403							0
D6RHZ5	Protein transport protein Sec31A OS=Homo sapiens OX=9606 GN=SEC31A PE=1 SV=1 - [D6RHZ5_HUMAN]	5.02	4	2	2	3	45.9	5.02	2	2					26.42	2.96	1	1	877	96.4427	6.37939
	Sequence	# PSMs	# Proteins	# Protein Groups	Protein Group Accessions	Modifications	MH+ [Da]	q-Value	PEP	A2	IonScore A2	Exp Value A2	B2	IonScore B2	Exp Value B2	C2	IonScore C2	Exp Value C2	# Missed Cleavages
	DSDQVAQSDGEESPAAEEQLLGEHIK	2	4	1	D6RHZ5	S8(Phospho)	2862.24	0	3.936e-16	High	45.9	0.00244702				High	26.42	0.197136	0
	AQGEPVAGHESPKIPYEK	1	3	1	D6RHZ5	S11(Phospho)	2016.95	0.006	0.01985	High	12.31	6.15689							1
P31323	cAMP-dependent protein kinase type II-beta regulatory subunit OS=Homo sapiens OX=9606 GN=PRKAR2B PE=1 SV=3 - [KAP3_HUMAN]	5.02	1	1	1	1	31.19	5.02	1	1									418	46.2729	4.91943
	Sequence	# PSMs	# Proteins	# Protein Groups	Protein Group Accessions	Modifications	MH+ [Da]	q-Value	PEP	A2	IonScore A2	Exp Value A2	B2	IonScore B2	Exp Value B2	C2	IonScore C2	Exp Value C2	# Missed Cleavages
	RASVCAEAYNPDEEEDDAESR	1	1	1	P31323	S3(Phospho); C5(Carbamidomethyl)	2492.95	0	1.602e-07	High	31.19	0.0382064							1
Q13610	Periodic tryptophan protein 1 homolog OS=Homo sapiens OX=9606 GN=PWP1 PE=1 SV=1 - [PWP1_HUMAN]	4.99	1	1	1	1	36.72	4.99	1	1									501	55.7931	4.76709
	Sequence	# PSMs	# Proteins	# Protein Groups	Protein Group Accessions	Modifications	MH+ [Da]	q-Value	PEP	A2	IonScore A2	Exp Value A2	B2	IonScore B2	Exp Value B2	C2	IonScore C2	Exp Value C2	# Missed Cleavages
	LQEEGGGSDEEETGSPSEDGMQSAR	1	1	1	Q13610	S8(Phospho)	2662.01	0	3.936e-16	High	36.72	0.00944894							0
P02751	Fibronectin OS=Homo sapiens OX=9606 GN=FN1 PE=1 SV=5 - [FINC_HUMAN]	4.97	1	8	8	8	93.1005	2.62	4	4	25.6	2.34	4	4					2477	272.15	5.50342
	Sequence	# PSMs	# Proteins	# Protein Groups	Protein Group Accessions	Modifications	MH+ [Da]	q-Value	PEP	A2	IonScore A2	Exp Value A2	B2	IonScore B2	Exp Value B2	C2	IonScore C2	Exp Value C2	# Missed Cleavages
	TNTNVNCPIECFMPLDVQADREDSRE	1	1	1	P02751	C7(Carbamidomethyl); C11(Carbamidomethyl); S24(Phospho)	3190.33	0	3.936e-16	High	51.9	0.000596585							2
	VPGTSTSATLTGLTR	1	1	1	P02751		1461.79	0	3.936e-16	High	49.16	0.000661297							0
	GLAFTDVDVDSIK	1	1	1	P02751		1379.71	0	3.676e-06	High	42.29	0.00493113							0
	IYLYTLNDNAR	1	1	1	P02751		1355.7	0.001	0.001827	High	21	0.574696							0
	GFNCESKPEAEETCFDK	1	1	1	P02751	C4(Carbamidomethyl); C14(Carbamidomethyl)	2047.84	0.002	0.1556				High	23.42	0.27868				0
	WCGTTQNYDADQK	1	1	1	P02751	C2(Carbamidomethyl)	1586.65	0.002	0.157				High	19.27	0.566677				0
	NLQPASEYTVSLVAIK	1	1	1	P02751		1732.95	0.002	0.1027				High	14.91	1.72402				0
	IAWESPQGQVSR	1	1	1	P02751		1357.69	0.006	0.2069				High	13.59	3.37986				0
Q5QPR4	Cyclin-dependent kinase 11A OS=Homo sapiens OX=9606 GN=CDK11A PE=1 SV=1 - [Q5QPR4_HUMAN]	4.96	7	3	3	3	48.0667	4.96	3	3									746	86.7709	5.32568
	Sequence	# PSMs	# Proteins	# Protein Groups	Protein Group Accessions	Modifications	MH+ [Da]	q-Value	PEP	A2	IonScore A2	Exp Value A2	B2	IonScore B2	Exp Value B2	C2	IonScore C2	Exp Value C2	# Missed Cleavages
	GTSPRPPEGGLGYSQLGDDDLK	1	7	1	Q5QPR4	S3(Phospho)	2339.06	0	1.187e-15	High	33.36	0.0453475							0
	RGTSPRPPEGGLGYSQLGDDDLK	1	7	1	Q5QPR4	T3(Phospho); S4(Phospho)	2575.12	0	1.433e-09	High	28.11	0.156689							1
	DLLSDLQDISDSER	1	7	1	Q5QPR4	S12(Phospho)	1685.73	0.001	0.0009097	High	31.93	0.0464877							0
K7EJB9	Calreticulin (Fragment) OS=Homo sapiens OX=9606 GN=CALR PE=1 SV=1 - [K7EJB9_HUMAN]	4.86	2	1	1	1					39.57	4.86	1	1					247	28.4139	4.67822
	Sequence	# PSMs	# Proteins	# Protein Groups	Protein Group Accessions	Modifications	MH+ [Da]	q-Value	PEP	A2	IonScore A2	Exp Value A2	B2	IonScore B2	Exp Value B2	C2	IonScore C2	Exp Value C2	# Missed Cleavages
	EQFLDGDGWTSR	1	2	1	K7EJB9		1410.63	0	0.03549				High	39.57	0.00709923				0
C9JHW1	GRB10-interacting GYF protein 2 (Fragment) OS=Homo sapiens OX=9606 GN=GIGYF2 PE=1 SV=1 - [C9JHW1_HUMAN]	4.86	4	1	1	2					52.83	4.86	1	2					720	81.7383	4.93213
	Sequence	# PSMs	# Proteins	# Protein Groups	Protein Group Accessions	Modifications	MH+ [Da]	q-Value	PEP	A2	IonScore A2	Exp Value A2	B2	IonScore B2	Exp Value B2	C2	IonScore C2	Exp Value C2	# Missed Cleavages
	VGVEASEETPQTSSSSARPGTPSDHQSQEASQFER	2	4	1	C9JHW1	T21(Phospho)	3783.64	0	0.05276				High	52.83	0.000530576				0
O15117	FYN-binding protein 1 OS=Homo sapiens OX=9606 GN=FYB1 PE=1 SV=2 - [FYB1_HUMAN]	4.85	1	1	1	1	35.44	4.85	1	1									783	85.3351	6.48096
	Sequence	# PSMs	# Proteins	# Protein Groups	Protein Group Accessions	Modifications	MH+ [Da]	q-Value	PEP	A2	IonScore A2	Exp Value A2	B2	IonScore B2	Exp Value B2	C2	IonScore C2	Exp Value C2	# Missed Cleavages
	SPVNEDNQDGVTHSDGAGNLDEEQDSEGETYEDIEASK	1	1	1	O15117	S26(Phospho)	4160.66	0	9.87e-11	High	35.44	0.0188315							0
S4R303	Sorbin and SH3 domain-containing protein 1 (Fragment) OS=Homo sapiens OX=9606 GN=SORBS1 PE=1 SV=2 - [S4R303_HUMAN]	4.83	2	1	1	1					34.92	4.83	1	1					393	42.0225	9.40771
	Sequence	# PSMs	# Proteins	# Protein Groups	Protein Group Accessions	Modifications	MH+ [Da]	q-Value	PEP	A2	IonScore A2	Exp Value A2	B2	IonScore B2	Exp Value B2	C2	IonScore C2	Exp Value C2	# Missed Cleavages
	RVGEQDSAPTQEKPTSPGK	1	2	1	S4R303	S16(Phospho)	2091.97	0.002	0.1272				High	34.92	0.0357217				1
H3BQZ7	HCG2044799 OS=Homo sapiens OX=9606 GN=HNRNPUL2-BSCL2 PE=4 SV=1 - [H3BQZ7_HUMAN]	4.69	2	3	3	11	40.6667	3.08	2	5	71.09	4.69	2	4	26.78	4.69	2	2	746	84.6392	4.93213
	Sequence	# PSMs	# Proteins	# Protein Groups	Protein Group Accessions	Modifications	MH+ [Da]	q-Value	PEP	A2	IonScore A2	Exp Value A2	B2	IonScore B2	Exp Value B2	C2	IonScore C2	Exp Value C2	# Missed Cleavages
	REEDEPEERSGDETPGSEVPGDK	4	2	1	H3BQZ7	S10(Phospho)	2624.07	0	0.01389	High	31.37	0.0548552	High	60.25	7.30231e-05	High	26.78	0.146086	2
	EEDEPEERSGDETPGSEVPGDK	2	2	1	H3BQZ7	S9(Phospho)	2467.96	0.001	0.001827	High	18.07	0.970821							1
	REEDEPEERSGDETPGSEVPGDK	1	2	1	H3BQZ7	S10(Phospho); T14(Phospho); S17(Phospho)	2784	0.001	0.001827	High	14.44	1.18178							2
	SKSPLPPEEEAK	3	2	1	H3BQZ7	S3(Phospho)	1391.64	0.001	0.001705				High	19.52	0.852725	High	18.34	1.05666	1
	REEDEPEERSGDETPGSEVPGDK	1	2	1	H3BQZ7	S10(Phospho); S17(Phospho)	2704.03	0.006	0.0485	High	26.56	0.115258							2
Q5JW85	Glutathione transferase OS=Homo sapiens OX=9606 GN=GSTA3 PE=1 SV=1 - [Q5JW85_HUMAN]	4.65	4	1	1	1					30.62	4.65	1	1					172	19.7296	9.15869
	Sequence	# PSMs	# Proteins	# Protein Groups	Protein Group Accessions	Modifications	MH+ [Da]	q-Value	PEP	A2	IonScore A2	Exp Value A2	B2	IonScore B2	Exp Value B2	C2	IonScore C2	Exp Value C2	# Missed Cleavages
	FLQPGSPR	1	4	1	Q5JW85	S6(Phospho)	981.455	0.002	0.1177				High	30.62	0.0439983				0
Q8NFZ8	Cell adhesion molecule 4 OS=Homo sapiens OX=9606 GN=CADM4 PE=1 SV=1 - [CADM4_HUMAN]	4.64	1	1	1	1	41.22	4.64	1	1									388	42.7588	6.30322
	Sequence	# PSMs	# Proteins	# Protein Groups	Protein Group Accessions	Modifications	MH+ [Da]	q-Value	PEP	A2	IonScore A2	Exp Value A2	B2	IonScore B2	Exp Value B2	C2	IonScore C2	Exp Value C2	# Missed Cleavages
	GSYLTHEASGLDEQGEAR	1	1	1	Q8NFZ8	S9(Phospho)	1999.84	0	0.0001293	High	41.22	0.0061691							0
P23141	Liver carboxylesterase 1 OS=Homo sapiens OX=9606 GN=CES1 PE=1 SV=2 - [EST1_HUMAN]	4.59	1	2	2	2	40.86	4.59	2	2									567	62.4812	6.59521
	Sequence	# PSMs	# Proteins	# Protein Groups	Protein Group Accessions	Modifications	MH+ [Da]	q-Value	PEP	A2	IonScore A2	Exp Value A2	B2	IonScore B2	Exp Value B2	C2	IonScore C2	Exp Value C2	# Missed Cleavages
	FLSLDLQGDPR	1	1	1	P23141		1260.66	0	0.0009097	High	29.97	0.082216							0
	AISESGVALTSVLVK	1	1	1	P23141		1473.85	0	6.522e-16	High	27.89	0.047466							0
A0A2R8Y5E8	Histidine--tRNA ligase, mitochondrial (Fragment) OS=Homo sapiens OX=9606 GN=HARS2 PE=1 SV=1 - [A0A2R8Y5E8_HUMAN]	4.57	5	1	1	2	28.59	4.57	1	1					34.58	4.57	1	1	219	24.9536	8.30908
	Sequence	# PSMs	# Proteins	# Protein Groups	Protein Group Accessions	Modifications	MH+ [Da]	q-Value	PEP	A2	IonScore A2	Exp Value A2	B2	IonScore B2	Exp Value B2	C2	IonScore C2	Exp Value C2	# Missed Cleavages
	DLSPQHMVVR	2	5	1	A0A2R8Y5E8	S3(Phospho)	1261.57	0	4.014e-05	High	28.59	0.0940133				High	34.58	0.0224155	0
Q9Y2X3	Nucleolar protein 58 OS=Homo sapiens OX=9606 GN=NOP58 PE=1 SV=1 - [NOP58_HUMAN]	4.54	1	2	2	5	80.73	4.54	2	4					32.7	4.35	1	1	529	59.5405	8.92432
	Sequence	# PSMs	# Proteins	# Protein Groups	Protein Group Accessions	Modifications	MH+ [Da]	q-Value	PEP	A2	IonScore A2	Exp Value A2	B2	IonScore B2	Exp Value B2	C2	IonScore C2	Exp Value C2	# Missed Cleavages
	HIKEEPLSEEEPCTSTAIASPEK	2	1	1	Q9Y2X3	S8(Phospho); C13(Carbamidomethyl)	2662.2	0	3.936e-16	High	52.45	0.000615783				High	32.7	0.0543745	1
	HIKEEPLSEEEPCTSTAIASPEK	1	1	1	Q9Y2X3	S8(Phospho); C13(Carbamidomethyl); S20(Phospho)	2742.17	0	7.851e-14	High	36.26	0.0218729							1
	HIKEEPLSEEEPCTSTAIASPEKK	2	1	1	Q9Y2X3	S8(Phospho); C13(Carbamidomethyl); S20(Phospho)	2870.26	0	0.0009097	High	29.91	0.107505							2
Q14676	Mediator of DNA damage checkpoint protein 1 OS=Homo sapiens OX=9606 GN=MDC1 PE=1 SV=3 - [MDC1_HUMAN]	4.5	1	4	4	7	113.591	4.5	4	7									2089	226.529	5.46533
	Sequence	# PSMs	# Proteins	# Protein Groups	Protein Group Accessions	Modifications	MH+ [Da]	q-Value	PEP	A2	IonScore A2	Exp Value A2	B2	IonScore B2	Exp Value B2	C2	IonScore C2	Exp Value C2	# Missed Cleavages
	GPGAPGLAHLQESQAGSDTDVEEGK	2	1	1	Q14676	S17(Phospho)	2530.11	0	3.936e-16	High	51.3	0.000797279							0
	LLLAEDSEEEVDFLSER	1	1	1	Q14676	S7(Phospho)	2073.93	0	3.936e-16	High	40.93	0.0076203							0
	SQTTTERDSDTDVEEEELPVENR	1	1	1	Q14676	T11(Phospho)	2759.16	0	2.52e-09	High	36.78	0.0183447							1
	SQTTTERDSDTDVEEEELPVENR	1	1	1	Q14676	T5(Phospho); T11(Phospho)	2839.12	0	1.513e-11	High	22.81	0.331439							1
	SQPPGEDSDTDVDDDSRPPGRPAEVHLER	2	1	1	Q14676	S8(Phospho); T10(Phospho)	3333.37	0.001	0.0009097	High	21.11	0.621893							0
P13796	Plastin-2 OS=Homo sapiens OX=9606 GN=LCP1 PE=1 SV=6 - [PLSL_HUMAN]	4.47	3	2	2	4	78.5052	4.47	2	2	21.01	1.91	1	1	50.96	1.91	1	1	627	70.2439	5.42725
	Sequence	# PSMs	# Proteins	# Protein Groups	Protein Group Accessions	Modifications	MH+ [Da]	q-Value	PEP	A2	IonScore A2	Exp Value A2	B2	IonScore B2	Exp Value B2	C2	IonScore C2	Exp Value C2	# Missed Cleavages
	GSVSDEEMMELR	2	3	1	P13796	S2(Phospho)	1462.56	0	3.936e-16	High	75.54	9.67616e-07				High	50.96	0.000244111	0
	FSLVGIGGQDLNEGNR	1	1	1	P13796		1675.84	0	6.071e-16	High	33.33	0.0396464							0
	GSVSDEEMMELR	1	3	1	P13796	S2(Phospho); M9(Oxidation)	1478.56	0.002	0.0691				High	21.01	0.242109				0
A0A0A0MQU1	Inverted formin-2 (Fragment) OS=Homo sapiens OX=9606 GN=INF2 PE=1 SV=1 - [A0A0A0MQU1_HUMAN]	4.46	2	1	1	3	93.7867	4.46	1	3									717	78.7773	5.57959
	Sequence	# PSMs	# Proteins	# Protein Groups	Protein Group Accessions	Modifications	MH+ [Da]	q-Value	PEP	A2	IonScore A2	Exp Value A2	B2	IonScore B2	Exp Value B2	C2	IonScore C2	Exp Value C2	# Missed Cleavages
	GARPPAAGPGGDEDEDEEDTAPESALDTSLDK	1	2	1	A0A0A0MQU1	T20(Phospho); S29(Phospho)	3372.34	0	3.936e-16	High	47.8	0.00102977							0
	GARPPAAGPGGDEDEDEEDTAPESALDTSLDK	2	2	1	A0A0A0MQU1	S29(Phospho)	3292.37	0	3.936e-16	High	46.32	0.00199161							0
Q9C0C2	182 kDa tankyrase-1-binding protein OS=Homo sapiens OX=9606 GN=TNKS1BP1 PE=1 SV=4 - [TB182_HUMAN]	4.45	2	4	4	5	86.89	4.45	4	4					57.46	0.69	1	1	1729	181.685	4.85596
	Sequence	# PSMs	# Proteins	# Protein Groups	Protein Group Accessions	Modifications	MH+ [Da]	q-Value	PEP	A2	IonScore A2	Exp Value A2	B2	IonScore B2	Exp Value B2	C2	IonScore C2	Exp Value C2	# Missed Cleavages
	SQEADVQDWEFR	2	2	1	Q9C0C2	S1(Phospho)	1589.63	0	3.936e-16	High	59.82	4.64352e-05				High	57.46	7.51096e-05	0
	TEAQDLCRASPEPPGPESSSR	1	1	1	Q9C0C2	C7(Carbamidomethyl); S10(Phospho)	2351	0	8.426e-14	High	35.74	0.0219216							1
	SFGTRPLSSGFSPEEAQQQDEEFEK	1	1	1	Q9C0C2	S9(Phospho)	2910.25	0	3.936e-16	High	33.87	0.0405077							0
	YESQEPLAGQESPLPLATR	1	1	1	Q9C0C2	S12(Phospho)	2166.01	0	0.0009097	High	18.96	1.31631							0
O95391	Pre-mRNA-splicing factor SLU7 OS=Homo sapiens OX=9606 GN=SLU7 PE=1 SV=2 - [SLU7_HUMAN]	4.44	1	1	1	1	35.32	4.44	1	1									586	68.3438	7.13721
	Sequence	# PSMs	# Proteins	# Protein Groups	Protein Group Accessions	Modifications	MH+ [Da]	q-Value	PEP	A2	IonScore A2	Exp Value A2	B2	IonScore B2	Exp Value B2	C2	IonScore C2	Exp Value C2	# Missed Cleavages
	DHNSEDEDEDKYADDIDMPGQNFDSK	1	1	1	O95391	S4(Phospho)	3109.16	0	3.936e-16	High	35.32	0.0125585							1
B5MCW2	60S ribosomal protein L3 (Fragment) OS=Homo sapiens OX=9606 GN=RPL3 PE=1 SV=1 - [B5MCW2_HUMAN]	4.41	3	1	1	1					26.87	4.41	1	1					272	31.2236	9.96436
	Sequence	# PSMs	# Proteins	# Protein Groups	Protein Group Accessions	Modifications	MH+ [Da]	q-Value	PEP	A2	IonScore A2	Exp Value A2	B2	IonScore B2	Exp Value B2	C2	IonScore C2	Exp Value C2	# Missed Cleavages
	NNASTDYDLSDK	1	3	1	B5MCW2		1342.58	0	0.03507				High	26.87	0.112252				0
G3XAM7	Catenin (Cadherin-associated protein), alpha 1, 102kDa, isoform CRA_a OS=Homo sapiens OX=9606 GN=CTNNA1 PE=1 SV=1 - [G3XAM7_HUMAN]	4.4	2	3	3	9	67.26	4.4	2	4	35.91	2.38	2	3	46.6983	2.14	1	2	841	92.6634	5.51611
	Sequence	# PSMs	# Proteins	# Protein Groups	Protein Group Accessions	Modifications	MH+ [Da]	q-Value	PEP	A2	IonScore A2	Exp Value A2	B2	IonScore B2	Exp Value B2	C2	IonScore C2	Exp Value C2	# Missed Cleavages
	TPEELDDSDFETEDFDVR	5	2	1	G3XAM7	S8(Phospho)	2238.85	0	1.383e-09	High	38.48	0.00708819	High	35.91	0.0127583	High	50.95	0.000392924	0
	SRTSVQTEDDQLIAGQSAR	2	2	1	G3XAM7	S4(Phospho)	2141.98	0	3.936e-16	High	37.13	0.019616							1
	SRTSVQTEDDQLIAGQSAR	1	2	1	G3XAM7	S1(Phospho); T3(Phospho)	2221.95	0.001	0.001827	High	25.76	0.210245							1
	TPEELDDSDFETEDFDVRSR	1	2	1	G3XAM7	S8(Phospho); S19(Phospho)	2561.97	0.004	0.1864				High	15.56	1.2189				1
Q9ULX3	RNA-binding protein NOB1 OS=Homo sapiens OX=9606 GN=NOB1 PE=1 SV=1 - [NOB1_HUMAN]	4.37	1	1	1	1	32.5	4.37	1	1									412	46.6458	7.18115
	Sequence	# PSMs	# Proteins	# Protein Groups	Protein Group Accessions	Modifications	MH+ [Da]	q-Value	PEP	A2	IonScore A2	Exp Value A2	B2	IonScore B2	Exp Value B2	C2	IonScore C2	Exp Value C2	# Missed Cleavages
	KDDSDDDGGGWITPSNIK	1	1	1	Q9ULX3	S4(Phospho)	1999.83	0	1.242e-09	High	32.5	0.0423724							1
A0A3B3ITC2	Beta-1-syntrophin OS=Homo sapiens OX=9606 GN=SNTB1 PE=1 SV=1 - [A0A3B3ITC2_HUMAN]	4.35	2	1	1	1	36.47	4.35	1	1									414	44.2221	9.11475
	Sequence	# PSMs	# Proteins	# Protein Groups	Protein Group Accessions	Modifications	MH+ [Da]	q-Value	PEP	A2	IonScore A2	Exp Value A2	B2	IonScore B2	Exp Value B2	C2	IonScore C2	Exp Value C2	# Missed Cleavages
	GSPVSEIGWETPPPESPR	1	2	1	A0A3B3ITC2	S16(Phospho)	2001.9	0	3.493e-07	High	36.47	0.0200402							0
P18669	Phosphoglycerate mutase 1 OS=Homo sapiens OX=9606 GN=PGAM1 PE=1 SV=2 - [PGAM1_HUMAN]	4.33	1	1	1	1	30.32	4.33	1	1									254	28.7858	7.18115
	Sequence	# PSMs	# Proteins	# Protein Groups	Protein Group Accessions	Modifications	MH+ [Da]	q-Value	PEP	A2	IonScore A2	Exp Value A2	B2	IonScore B2	Exp Value B2	C2	IonScore C2	Exp Value C2	# Missed Cleavages
	HGESAWNLENR	1	1	1	P18669	S4(Phospho)	1392.57	0.001	0.0009097	High	30.32	0.0466806							0
S4R3H4	Apoptotic chromatin condensation inducer in the nucleus OS=Homo sapiens OX=9606 GN=ACIN1 PE=1 SV=1 - [S4R3H4_HUMAN]	4.29	4	5	5	8	26.49	0.86	2	2	87.4778	3.43	3	4	37.35	2.1	2	2	1283	145.355	5.99854
	Sequence	# PSMs	# Proteins	# Protein Groups	Protein Group Accessions	Modifications	MH+ [Da]	q-Value	PEP	A2	IonScore A2	Exp Value A2	B2	IonScore B2	Exp Value B2	C2	IonScore C2	Exp Value C2	# Missed Cleavages
	SSSISEEKGDSDDEKPR	3	3	1	S4R3H4	S11(Phospho)	1945.8	0	0.02192				High	73.87	2.61095e-06	High	30.09	0.0604835	1
	RLSQPESAEK	2	3	1	S4R3H4	S3(Phospho)	1224.56	0.001	0.01228				High	21.93	0.407489	High	28.26	0.0922547	1
	TAQVPSPPR	1	4	1	S4R3H4	S6(Phospho)	1032.49	0.003	0.01384	High	26.49	0.118477							0
	GVPAGNSDTEGGQPGRK	1	4	1	S4R3H4	S7(Phospho)	1706.75	0.006	0.205				High	27.02	0.148063				1
	TAQVPSPPRGK	1	4	1	S4R3H4	S6(Phospho)	1217.6	0.009	0.08509	High	20.87	0.574153							1
G3V4X8	SNW domain-containing protein 1 OS=Homo sapiens OX=9606 GN=SNW1 PE=1 SV=1 - [G3V4X8_HUMAN]	4.28	3	2	2	2	29.75	4.28	2	2									374	43.3051	9.70068
	Sequence	# PSMs	# Proteins	# Protein Groups	Protein Group Accessions	Modifications	MH+ [Da]	q-Value	PEP	A2	IonScore A2	Exp Value A2	B2	IonScore B2	Exp Value B2	C2	IonScore C2	Exp Value C2	# Missed Cleavages
	GPPSPPAPVMHSPSR	1	3	1	G3V4X8	S4(Phospho); S12(Phospho)	1673.69	0	0.0009097	High	29.75	0.0700696							0
	GPPSPPAPVMHSPSRK	1	3	1	G3V4X8	S4(Phospho); S14(Phospho)	1801.79	0.001	0.001493	High	14.01	3.10604							1
E7EV99	Alpha-adducin OS=Homo sapiens OX=9606 GN=ADD1 PE=1 SV=1 - [E7EV99_HUMAN]	4.27	7	2	2	3					23.5	4.27	2	3					632	70.0124	6.45557
	Sequence	# PSMs	# Proteins	# Protein Groups	Protein Group Accessions	Modifications	MH+ [Da]	q-Value	PEP	A2	IonScore A2	Exp Value A2	B2	IonScore B2	Exp Value B2	C2	IonScore C2	Exp Value C2	# Missed Cleavages
	AAVVTSPPPTTAPHK	2	7	1	E7EV99	S6(Phospho)	1553.77	0.002	0.1434				High	25.67	0.248118				0
	QKGSEENLDEAR	1	3	1	E7EV99	S4(Phospho)	1455.61	0.004	0.1826				High	14.42	1.96246				1
A6NNK5	TP53-binding protein 1 OS=Homo sapiens OX=9606 GN=TP53BP1 PE=1 SV=2 - [A6NNK5_HUMAN]	4.26	2	4	4	5	41.1	4.26	4	5									1927	208.89	4.66553
	Sequence	# PSMs	# Proteins	# Protein Groups	Protein Group Accessions	Modifications	MH+ [Da]	q-Value	PEP	A2	IonScore A2	Exp Value A2	B2	IonScore B2	Exp Value B2	C2	IonScore C2	Exp Value C2	# Missed Cleavages
	STPFIVPSSPTEQEGR	1	2	1	A6NNK5	S9(Phospho)	1811.82	0	2.944e-05	High	32.96	0.0459289							0
	EHHPEEGSSGSEVEEIPETPCESQGEELK	1	2	1	A6NNK5	S8(Phospho); S9(Phospho); S11(Phospho); C21(Carbamidomethyl)	3476.28	0	3.936e-16	High	27.04	0.0749271							0
	GNLLHFPSSQGEEEK	2	2	1	A6NNK5	S9(Phospho)	1751.77	0	0.0008448	High	21.1	0.608578							0
	SGTAETEPVEQDSSQPSLPLVR	1	2	1	A6NNK5	S14(Phospho)	2407.11	0.001	0.001827	High	21.53	0.719595							0
Q9NZN4	EH domain-containing protein 2 OS=Homo sapiens OX=9606 GN=EHD2 PE=1 SV=2 - [EHD2_HUMAN]	4.24	1	1	1	1	20.27	4.24	1	1									543	61.1227	6.45557
	Sequence	# PSMs	# Proteins	# Protein Groups	Protein Group Accessions	Modifications	MH+ [Da]	q-Value	PEP	A2	IonScore A2	Exp Value A2	B2	IonScore B2	Exp Value B2	C2	IonScore C2	Exp Value C2	# Missed Cleavages
	GPDEAMEDGEEGSDDEAEWVVTK	1	1	1	Q9NZN4	S13(Phospho)	2574.97	0	1.043e-07	High	20.27	0.37354							0
Q15637	Splicing factor 1 OS=Homo sapiens OX=9606 GN=SF1 PE=1 SV=4 - [SF01_HUMAN]	4.23	1	2	2	2	26.57	4.23	2	2									639	68.2859	8.98291
	Sequence	# PSMs	# Proteins	# Protein Groups	Protein Group Accessions	Modifications	MH+ [Da]	q-Value	PEP	A2	IonScore A2	Exp Value A2	B2	IonScore B2	Exp Value B2	C2	IonScore C2	Exp Value C2	# Missed Cleavages
	TGDLGIPPNPEDRSPSPEPIYNSEGK	1	1	1	Q15637	S14(Phospho); S16(Phospho)	2926.26	0	2.546e-15	High	26.57	0.205533							1
	TGDLGIPPNPEDRSPSPEPIYNSEGKR	1	1	1	Q15637	S14(Phospho); S16(Phospho)	3082.36	0.001	0.001827	High	14.92	3.41433							2
Q5H907	Melanoma antigen family D, 2, isoform CRA_d OS=Homo sapiens OX=9606 GN=MAGED2 PE=1 SV=1 - [Q5H907_HUMAN]	4.22	3	1	1	1					25.51	4.22	1	1					521	55.7613	7.81104
	Sequence	# PSMs	# Proteins	# Protein Groups	Protein Group Accessions	Modifications	MH+ [Da]	q-Value	PEP	A2	IonScore A2	Exp Value A2	B2	IonScore B2	Exp Value B2	C2	IonScore C2	Exp Value C2	# Missed Cleavages
	HLDGEEDGSSDQSQASGTTGGR	1	3	1	Q5H907	S13(Phospho)	2270.88	0.002	0.06243				High	25.51	0.141298				0
P53985	Monocarboxylate transporter 1 OS=Homo sapiens OX=9606 GN=SLC16A1 PE=1 SV=3 - [MOT1_HUMAN]	4.2	1	3	3	7	75.75	4.2	3	6					33.88	4.2	1	1	500	53.9089	8.66064
	Sequence	# PSMs	# Proteins	# Protein Groups	Protein Group Accessions	Modifications	MH+ [Da]	q-Value	PEP	A2	IonScore A2	Exp Value A2	B2	IonScore B2	Exp Value B2	C2	IonScore C2	Exp Value C2	# Missed Cleavages
	KESKEEETSIDVAGKPNEVTK	2	1	1	P53985	S3(Phospho)	2398.14	0	3.936e-16	High	57.86	0.000176367							2
	KESKEEETSIDVAGKPNEVTK	3	1	1	P53985	T8(Phospho); S9(Phospho)	2478.09	0	0.0007006	High	26.29	0.253408				High	33.88	0.0401075	2
	ESKEEETSIDVAGKPNEVTK	1	1	1	P53985	S8(Phospho)	2270.05	0	1.969e-08	High	18.07	1.6656							1
	EEETSIDVAGKPNEVTK	1	1	1	P53985	T4(Phospho)	1925.88	0.002	0.01384	High	13.76	4.04739							0
O95671	Probable bifunctional dTTP/UTP pyrophosphatase/methyltransferase protein OS=Homo sapiens OX=9606 GN=ASMTL PE=1 SV=3 - [ASML_HUMAN]	4.19	1	1	1	1	38.23	4.19	1	1									621	68.813	6.07471
	Sequence	# PSMs	# Proteins	# Protein Groups	Protein Group Accessions	Modifications	MH+ [Da]	q-Value	PEP	A2	IonScore A2	Exp Value A2	B2	IonScore B2	Exp Value B2	C2	IonScore C2	Exp Value C2	# Missed Cleavages
	HDSIPAADTFEDLSDVEGGGSEPTQR	1	1	1	O95671	S14(Phospho)	2810.18	0	7.477e-11	High	38.23	0.0129045							0
Q8IWZ8	SURP and G-patch domain-containing protein 1 OS=Homo sapiens OX=9606 GN=SUGP1 PE=1 SV=2 - [SUGP1_HUMAN]	4.19	1	1	1	1	39.95	4.19	1	1									645	72.4255	7.60596
	Sequence	# PSMs	# Proteins	# Protein Groups	Protein Group Accessions	Modifications	MH+ [Da]	q-Value	PEP	A2	IonScore A2	Exp Value A2	B2	IonScore B2	Exp Value B2	C2	IonScore C2	Exp Value C2	# Missed Cleavages
	AVQQHQHGYDSDEEVDSELGTWEHQLR	1	1	1	Q8IWZ8	S11(Phospho)	3273.39	0	3.936e-16	High	39.95	0.00983761							0
F8WCA5	RNA-binding protein 6 OS=Homo sapiens OX=9606 GN=RBM6 PE=1 SV=1 - [F8WCA5_HUMAN]	4.16	3	1	1	1	42.39	4.16	1	1									697	80.3404	5.84619
	Sequence	# PSMs	# Proteins	# Protein Groups	Protein Group Accessions	Modifications	MH+ [Da]	q-Value	PEP	A2	IonScore A2	Exp Value A2	B2	IonScore B2	Exp Value B2	C2	IonScore C2	Exp Value C2	# Missed Cleavages
	EGETQGVAFEHESPADFQNSQSPVQDQDK	1	3	1	F8WCA5	S22(Phospho)	3284.36	0	5.947e-11	High	42.39	0.00523127							0
Q9UPT8	Zinc finger CCCH domain-containing protein 4 OS=Homo sapiens OX=9606 GN=ZC3H4 PE=1 SV=3 - [ZC3H4_HUMAN]	4.14	2	2	2	2	28.68	1.84	1	1	33.76	2.3	1	1					1303	140.169	6.26514
	Sequence	# PSMs	# Proteins	# Protein Groups	Protein Group Accessions	Modifications	MH+ [Da]	q-Value	PEP	A2	IonScore A2	Exp Value A2	B2	IonScore B2	Exp Value B2	C2	IonScore C2	Exp Value C2	# Missed Cleavages
	TGSGSPFAGNSPAREGEQDAASLK	1	2	1	Q9UPT8	S11(Phospho)	2414.06	0	6.195e-05	High	28.68	0.131521							1
	QDRENEEGDTGNWYSSDEDEGGSSVTSILK	1	1	1	Q9UPT8	S15(Phospho); S16(Phospho)	3464.34	0	0.03322				High	33.76	0.0204263				1
Q12982	BCL2/adenovirus E1B 19 kDa protein-interacting protein 2 OS=Homo sapiens OX=9606 GN=BNIP2 PE=1 SV=1 - [BNIP2_HUMAN]	4.14	2	1	1	1	22.88	4.14	1	1									314	35.9951	4.80518
	Sequence	# PSMs	# Proteins	# Protein Groups	Protein Group Accessions	Modifications	MH+ [Da]	q-Value	PEP	A2	IonScore A2	Exp Value A2	B2	IonScore B2	Exp Value B2	C2	IonScore C2	Exp Value C2	# Missed Cleavages
	KGSITEYTAAEEK	1	2	1	Q12982	S3(Phospho)	1506.67	0	5.203e-07	High	22.88	0.373541							1
X6RCR8	AT-rich interactive domain-containing protein 4B (Fragment) OS=Homo sapiens OX=9606 GN=ARID4B PE=1 SV=1 - [X6RCR8_HUMAN]	4.14	2	1	1	1					20.77	4.14	1	1					483	55.2739	5.13525
	Sequence	# PSMs	# Proteins	# Protein Groups	Protein Group Accessions	Modifications	MH+ [Da]	q-Value	PEP	A2	IonScore A2	Exp Value A2	B2	IonScore B2	Exp Value B2	C2	IonScore C2	Exp Value C2	# Missed Cleavages
	EKEDNSSEEEEEIEPFPEER	1	2	1	X6RCR8	S7(Phospho)	2531	0.002	0.108				High	20.77	0.551513				1
A0A494C001	RNA-binding protein 15 OS=Homo sapiens OX=9606 GN=RBM15 PE=1 SV=2 - [A0A494C001_HUMAN]	4.13	4	3	3	6	38.88	4.13	3	3	20.56	1.79	1	1	43.92	3.13	2	2	896	97.9552	10.0522
	Sequence	# PSMs	# Proteins	# Protein Groups	Protein Group Accessions	Modifications	MH+ [Da]	q-Value	PEP	A2	IonScore A2	Exp Value A2	B2	IonScore B2	Exp Value B2	C2	IonScore C2	Exp Value C2	# Missed Cleavages
	SLSPGGAALGYR	2	4	1	A0A494C001	S3(Phospho)	1228.57	0	1.677e-07	High	39.82	0.00719199				High	43.92	0.00285275	0
	HCAPSPDRSPELSSSR	3	4	1	A0A494C001	C2(Carbamidomethyl); S5(Phospho); S9(Phospho)	1942.75	0	3.936e-05	High	16.06	0.963717	High	20.56	0.343698	High	16.76	0.740128	1
	DRTPPLLYR	1	4	1	A0A494C001	T3(Phospho)	1210.6	0.009	0.08509	High	13.46	4.05059							1
Q02880	DNA topoisomerase 2-beta OS=Homo sapiens OX=9606 GN=TOP2B PE=1 SV=3 - [TOP2B_HUMAN]	4.06	1	3	3	5	29.87	4.06	3	4					43.89	1.11	1	1	1626	183.152	8.00146
	Sequence	# PSMs	# Proteins	# Protein Groups	Protein Group Accessions	Modifications	MH+ [Da]	q-Value	PEP	A2	IonScore A2	Exp Value A2	B2	IonScore B2	Exp Value B2	C2	IonScore C2	Exp Value C2	# Missed Cleavages
	VKASPITNDGEDEFVPSDGLDK	2	1	1	Q02880	T7(Phospho)	2413.08	0	5.806e-14	High	28.34	0.152197							1
	KVVEAVNSDSDSEFGIPK	2	1	1	Q02880	S8(Phospho); S10(Phospho)	2080.88	0	3.477e-06	High	23.33	0.379277				High	43.89	0.0030624	1
	SEDDSAKFDSNEEDSASVFSPSFGLK	1	1	1	Q02880	S10(Phospho)	2875.19	0.001	0.007236	High	24.54	0.27035							1
P30041	Peroxiredoxin-6 OS=Homo sapiens OX=9606 GN=PRDX6 PE=1 SV=3 - [PRDX6_HUMAN]	4.02	1	1	1	2	32.27	4.02	1	1					24.66	4.02	1	1	224	25.0192	6.37939
	Sequence	# PSMs	# Proteins	# Protein Groups	Protein Group Accessions	Modifications	MH+ [Da]	q-Value	PEP	A2	IonScore A2	Exp Value A2	B2	IonScore B2	Exp Value B2	C2	IonScore C2	Exp Value C2	# Missed Cleavages
	LPFPIIDDR	2	1	1	P30041		1085.59	0	0.001335	High	32.27	0.0292905				High	24.66	0.163124	0
Q3YEC7	Rab-like protein 6 OS=Homo sapiens OX=9606 GN=RABL6 PE=1 SV=2 - [RABL6_HUMAN]	3.98	1	1	1	4	39.74	3.98	1	2	47.65	3.98	1	1	22.76	3.98	1	1	729	79.4996	5.22412
	Sequence	# PSMs	# Proteins	# Protein Groups	Protein Group Accessions	Modifications	MH+ [Da]	q-Value	PEP	A2	IonScore A2	Exp Value A2	B2	IonScore B2	Exp Value B2	C2	IonScore C2	Exp Value C2	# Missed Cleavages
	RADDFPVRDDPSDVTDEDEGPAEPPPPPK	3	1	1	Q3YEC7	S12(Phospho); T15(Phospho)	3320.37	0	1.502e-14	High	39.74	0.00844048				High	22.76	0.381093	2
	RADDFPVRDDPSDVTDEDEGPAEPPPPPK	1	1	1	Q3YEC7	T15(Phospho)	3240.41	0	0.009013				High	47.65	0.00171877				2
O94826	Mitochondrial import receptor subunit TOM70 OS=Homo sapiens OX=9606 GN=TOMM70 PE=1 SV=1 - [TOM70_HUMAN]	3.95	1	1	1	2	43.09	3.95	1	2									608	67.412	7.12256
	Sequence	# PSMs	# Proteins	# Protein Groups	Protein Group Accessions	Modifications	MH+ [Da]	q-Value	PEP	A2	IonScore A2	Exp Value A2	B2	IonScore B2	Exp Value B2	C2	IonScore C2	Exp Value C2	# Missed Cleavages
	ASPAPGSGHPEGPGAHLDMNSLDR	2	1	1	O94826	S2(Phospho)	2450.06	0	3.936e-16	High	40.02	0.0100188							0
J3QSV6	Ribosomal L1 domain-containing protein 1 (Fragment) OS=Homo sapiens OX=9606 GN=RSL1D1 PE=1 SV=1 - [J3QSV6_HUMAN]	3.95	2	1	1	3	28.5	3.95	1	2					21.57	3.95	1	1	430	48.1791	10.0229
	Sequence	# PSMs	# Proteins	# Protein Groups	Protein Group Accessions	Modifications	MH+ [Da]	q-Value	PEP	A2	IonScore A2	Exp Value A2	B2	IonScore B2	Exp Value B2	C2	IonScore C2	Exp Value C2	# Missed Cleavages
	ATNESEDEIPQLVPIGK	3	2	1	J3QSV6	S5(Phospho)	1919.9	0.001	0.001827	High	27.6	0.178211				High	21.57	0.71857	0
A0A3B3IU51	Tight junction protein ZO-2 OS=Homo sapiens OX=9606 GN=TJP2 PE=1 SV=1 - [A0A3B3IU51_HUMAN]	3.92	10	3	3	4	31.6	2.01	1	1	39.58	1.91	2	3					1047	118.297	7.56201
	Sequence	# PSMs	# Proteins	# Protein Groups	Protein Group Accessions	Modifications	MH+ [Da]	q-Value	PEP	A2	IonScore A2	Exp Value A2	B2	IonScore B2	Exp Value B2	C2	IonScore C2	Exp Value C2	# Missed Cleavages
	GSYGSDAEEEEYRQQLSEHSK	1	6	1	A0A3B3IU51	S5(Phospho)	2509.02	0	0.0009097	High	31.6	0.0448652							1
	GRSIDQDYER	1	9	1	A0A3B3IU51	S3(Phospho)	1318.54	0	0.03219				High	39.58	0.00477517				1
	SRSWEDSPER	1	9	1	A0A3B3IU51	S3(Phospho)	1328.53	0.002	0.05863				High	23.86	0.146986				1
	SRSWEDSPER	1	9	1	A0A3B3IU51	S3(Phospho); S7(Phospho)	1408.49	0.007	0.2205				High	16.36	0.440448				1
Q08J23	RNA cytosine C(5)-methyltransferase NSUN2 OS=Homo sapiens OX=9606 GN=NSUN2 PE=1 SV=2 - [NSUN2_HUMAN]	3.91	1	1	1	3	41.57	3.91	1	1	27.63	3.91	1	1	28.01	3.91	1	1	767	86.4158	6.771
	Sequence	# PSMs	# Proteins	# Protein Groups	Protein Group Accessions	Modifications	MH+ [Da]	q-Value	PEP	A2	IonScore A2	Exp Value A2	B2	IonScore B2	Exp Value B2	C2	IonScore C2	Exp Value C2	# Missed Cleavages
	AGEPNSPDAEEANSPDVTAGCDPAGVHPPR	2	1	1	Q08J23	S14(Phospho); C21(Carbamidomethyl)	3094.29	0	3.936e-16	High	41.57	0.00613728				High	28.01	0.124128	0
	AGEPNSPDAEEANSPDVTAGCDPAGVHPPR	1	1	1	Q08J23	S6(Phospho); S14(Phospho); C21(Carbamidomethyl)	3174.26	0.006	0.2081				High	27.63	0.109936				0
Q8WVC0	RNA polymerase-associated protein LEO1 OS=Homo sapiens OX=9606 GN=LEO1 PE=1 SV=1 - [LEO1_HUMAN]	3.9	1	2	2	2					34.6	3.9	2	2					666	75.3593	4.51318
	Sequence	# PSMs	# Proteins	# Protein Groups	Protein Group Accessions	Modifications	MH+ [Da]	q-Value	PEP	A2	IonScore A2	Exp Value A2	B2	IonScore B2	Exp Value B2	C2	IonScore C2	Exp Value C2	# Missed Cleavages
	KLTSDEEGEPSGK	1	1	1	Q8WVC0	S4(Phospho)	1456.62	0	0.04754				High	27.04	0.122177				1
	KYVISDEEEEDDD	1	1	1	Q8WVC0	S5(Phospho)	1665.61	0.002	0.08594				High	34.6	0.00872043				1
O60341	Lysine-specific histone demethylase 1A OS=Homo sapiens OX=9606 GN=KDM1A PE=1 SV=2 - [KDM1A_HUMAN]	3.87	2	1	1	1					24.75	3.87	1	1					852	92.8447	6.52197
	Sequence	# PSMs	# Proteins	# Protein Groups	Protein Group Accessions	Modifications	MH+ [Da]	q-Value	PEP	A2	IonScore A2	Exp Value A2	B2	IonScore B2	Exp Value B2	C2	IonScore C2	Exp Value C2	# Missed Cleavages
	KLPPPPPQAPPEEENESEPEEPSGVEGAAFQSR	1	2	1	O60341	S17(Phospho)	3606.63	0.002	0.1301				High	24.75	0.380018				1
Q86U06	Probable RNA-binding protein 23 OS=Homo sapiens OX=9606 GN=RBM23 PE=1 SV=1 - [RBM23_HUMAN]	3.87	1	1	1	1					25.55	3.87	1	1					439	48.7007	9.84717
	Sequence	# PSMs	# Proteins	# Protein Groups	Protein Group Accessions	Modifications	MH+ [Da]	q-Value	PEP	A2	IonScore A2	Exp Value A2	B2	IonScore B2	Exp Value B2	C2	IonScore C2	Exp Value C2	# Missed Cleavages
	EKSPVREPVDNLSPEER	1	1	1	Q86U06	S3(Phospho)	2060.97	0.004	0.1824				High	25.55	0.28906				2
A0A087WUT6	Eukaryotic translation initiation factor 5B OS=Homo sapiens OX=9606 GN=EIF5B PE=1 SV=1 - [A0A087WUT6_HUMAN]	3.85	2	3	3	7	56.46	1.56	1	2	60.79	2.3	2	3	86.93	1.56	1	2	1220	138.597	5.57959
	Sequence	# PSMs	# Proteins	# Protein Groups	Protein Group Accessions	Modifications	MH+ [Da]	q-Value	PEP	A2	IonScore A2	Exp Value A2	B2	IonScore B2	Exp Value B2	C2	IonScore C2	Exp Value C2	# Missed Cleavages
	NKPGPNIESGNEDDDASFK	4	2	1	A0A087WUT6	S9(Phospho)	2113.86	0	2.702e-15	High	41.25	0.00506179				High	76.76	1.25042e-06	0
	KWDGSEEDEDNSK	2	2	1	A0A087WUT6	S5(Phospho)	1618.59	0	0.03121				High	32.21	0.0165623				1
	KQSFDDNDSEELEDK	1	2	1	A0A087WUT6	S3(Phospho); S9(Phospho)	1958.69	0	0.003089				High	29.77	0.0232492				1
E5RH50	La-related protein 1 (Fragment) OS=Homo sapiens OX=9606 GN=LARP1 PE=1 SV=8 - [E5RH50_HUMAN]	3.77	3	2	2	3	30.2633	3.77	2	3									610	69.7039	6.46826
	Sequence	# PSMs	# Proteins	# Protein Groups	Protein Group Accessions	Modifications	MH+ [Da]	q-Value	PEP	A2	IonScore A2	Exp Value A2	B2	IonScore B2	Exp Value B2	C2	IonScore C2	Exp Value C2	# Missed Cleavages
	NTFTAWSDEESDYEIDDRDVNK	2	3	1	E5RH50	S7(Phospho); S11(Phospho)	2809.06	0	3.936e-16	High	24.14	0.168069							1
	KNTFTAWSDEESDYEIDDRDVNK	1	3	1	E5RH50	S8(Phospho); S12(Phospho)	2937.16	0.001	0.001827	High	23.3	0.277835							2
Q9UIG0	Tyrosine-protein kinase BAZ1B OS=Homo sapiens OX=9606 GN=BAZ1B PE=1 SV=2 - [BAZ1B_HUMAN]	3.71	1	3	3	3	48.37	2.83	2	2	0	0.88	1	1					1483	170.796	8.48486
	Sequence	# PSMs	# Proteins	# Protein Groups	Protein Group Accessions	Modifications	MH+ [Da]	q-Value	PEP	A2	IonScore A2	Exp Value A2	B2	IonScore B2	Exp Value B2	C2	IonScore C2	Exp Value C2	# Missed Cleavages
	LAEDEGDSEPEAVGQSR	1	1	1	Q9UIG0	S8(Phospho)	1868.76	0	3.936e-16	High	48.37	0.00080778							0
	KSDGACDSPSSDKENSSQIAQDHQK	1	1	1	Q9UIG0	C6(Carbamidomethyl); S8(Phospho); S11(Phospho)	2879.12	0.001	0.002687	High	10.6	4.52466							2
	DHTVSGDEDYCPR	1	1	1	Q9UIG0	S5(Phospho); C11(Carbamidomethyl)	1630.59	0.007	0.22				High	23.12	0.131876				0
Q13523	Serine/threonine-protein kinase PRP4 homolog OS=Homo sapiens OX=9606 GN=PRPF4B PE=1 SV=3 - [PRP4B_HUMAN]	3.67	2	2	2	3	23.65	3.67	2	2					25.24	1.19	1	1	1007	116.916	10.2573
	Sequence	# PSMs	# Proteins	# Protein Groups	Protein Group Accessions	Modifications	MH+ [Da]	q-Value	PEP	A2	IonScore A2	Exp Value A2	B2	IonScore B2	Exp Value B2	C2	IonScore C2	Exp Value C2	# Missed Cleavages
	VQSGMGLILQGYESGSEEEGEIHEK	1	1	1	Q13523	S14(Phospho); S16(Phospho)	2866.2	0.001	0.0009097	High	23.78	0.338595							0
	TRSPSPDDILER	2	2	1	Q13523	S3(Phospho); S5(Phospho)	1545.63	0.001	0.001338	High	15.87	1.22811				High	25.24	0.134951	1
A0A2R8Y6I5	Cytoplasmic dynein 1 heavy chain 1 (Fragment) OS=Homo sapiens OX=9606 GN=DYNC1H1 PE=1 SV=1 - [A0A2R8Y6I5_HUMAN]	3.66	5	1	1	1	22.36	3.66	1	1									355	40.73	8.35303
	Sequence	# PSMs	# Proteins	# Protein Groups	Protein Group Accessions	Modifications	MH+ [Da]	q-Value	PEP	A2	IonScore A2	Exp Value A2	B2	IonScore B2	Exp Value B2	C2	IonScore C2	Exp Value C2	# Missed Cleavages
	TDSTSDGRPAWMR	1	5	1	A0A2R8Y6I5	S3(Phospho)	1559.63	0.001	0.01384	High	22.36	0.294157							0
F5H8D7	DNA repair protein XRCC1 OS=Homo sapiens OX=9606 GN=XRCC1 PE=1 SV=2 - [F5H8D7_HUMAN]	3.65	2	1	1	3	20.09	3.65	1	3									602	65.9731	5.87158
	Sequence	# PSMs	# Proteins	# Protein Groups	Protein Group Accessions	Modifications	MH+ [Da]	q-Value	PEP	A2	IonScore A2	Exp Value A2	B2	IonScore B2	Exp Value B2	C2	IonScore C2	Exp Value C2	# Missed Cleavages
	TKPTQAAGPSSPQKPPTPEETK	1	2	1	F5H8D7	S11(Phospho)	2357.14	0	0.0009097	High	20.09	1.06128							0
	TKPTQAAGPSSPQKPPTPEETK	2	2	1	F5H8D7	S11(Phospho); T17(Phospho)	2437.11	0.001	0.001582	High	20.34	0.996825							0
A0A1B0GV68	FERM, ARHGEF and pleckstrin domain-containing protein 1 OS=Homo sapiens OX=9606 GN=FARP1 PE=1 SV=1 - [A0A1B0GV68_HUMAN]	3.62	3	2	2	2					46.69	3.62	2	2					801	88.0463	7.47412
	Sequence	# PSMs	# Proteins	# Protein Groups	Protein Group Accessions	Modifications	MH+ [Da]	q-Value	PEP	A2	IonScore A2	Exp Value A2	B2	IonScore B2	Exp Value B2	C2	IonScore C2	Exp Value C2	# Missed Cleavages
	LGAPENSGISTLER	1	3	1	A0A1B0GV68	T11(Phospho)	1523.71	0.002	0.05861				High	34.23	0.032188				0
	VSAGEPGSHPSPAPR	1	3	1	A0A1B0GV68	S11(Phospho)	1525.68	0.002	0.146				High	28.96	0.0857002				0
E9PCX8	Tensin-3 (Fragment) OS=Homo sapiens OX=9606 GN=TNS3 PE=1 SV=8 - [E9PCX8_HUMAN]	3.6	3	2	2	2	44.9	3.6	2	2									1249	133.759	6.90283
	Sequence	# PSMs	# Proteins	# Protein Groups	Protein Group Accessions	Modifications	MH+ [Da]	q-Value	PEP	A2	IonScore A2	Exp Value A2	B2	IonScore B2	Exp Value B2	C2	IonScore C2	Exp Value C2	# Missed Cleavages
	WDSYENLSADGEVLHTQGPVDGSLYAK	1	3	1	E9PCX8	S3(Phospho)	3031.34	0	3.936e-16	High	44.9	0.00339773							0
	GVGSGPHPPDTQQPSPSK	1	2	1	E9PCX8	S15(Phospho)	1852.83	0	0.0004867	High	17.51	1.54088							0
H3BPZ1	Very-long-chain (3R)-3-hydroxyacyl-CoA dehydratase OS=Homo sapiens OX=9606 GN=HACD3 PE=1 SV=1 - [H3BPZ1_HUMAN]	3.56	3	1	1	10	60.5575	3.56	1	5					47.9489	3.56	1	5	337	40.0429	8.96826
	Sequence	# PSMs	# Proteins	# Protein Groups	Protein Group Accessions	Modifications	MH+ [Da]	q-Value	PEP	A2	IonScore A2	Exp Value A2	B2	IonScore B2	Exp Value B2	C2	IonScore C2	Exp Value C2	# Missed Cleavages
	WLDESDAEMELR	7	3	1	H3BPZ1	S5(Phospho)	1573.63	0	3.936e-16	High	44.73	0.001659				High	33.15	0.0226351	0
	WLDESDAEMELR	3	3	1	H3BPZ1	S5(Phospho); M9(Oxidation)	1589.62	0	3.936e-16	High	38.65	0.00601781				High	27.84	0.0636372	0
Q9Y277	Voltage-dependent anion-selective channel protein 3 OS=Homo sapiens OX=9606 GN=VDAC3 PE=1 SV=1 - [VDAC3_HUMAN]	3.53	1	1	1	1	36.32	3.53	1	1									283	30.6393	8.66064
	Sequence	# PSMs	# Proteins	# Protein Groups	Protein Group Accessions	Modifications	MH+ [Da]	q-Value	PEP	A2	IonScore A2	Exp Value A2	B2	IonScore B2	Exp Value B2	C2	IonScore C2	Exp Value C2	# Missed Cleavages
	LTLSALIDGK	1	1	1	Q9Y277		1030.61	0	2.581e-15	High	36.32	0.00695371							0
H0YL11	IDP OS=Homo sapiens OX=9606 GN=IDH2 PE=1 SV=1 - [H0YL11_HUMAN]	3.53	2	1	1	1	33.64	3.53	1	1									312	35.3077	8.83643
	Sequence	# PSMs	# Proteins	# Protein Groups	Protein Group Accessions	Modifications	MH+ [Da]	q-Value	PEP	A2	IonScore A2	Exp Value A2	B2	IonScore B2	Exp Value B2	C2	IonScore C2	Exp Value C2	# Missed Cleavages
	LIDDMVAQVLK	1	2	1	H0YL11		1244.69	0	3.936e-16	High	33.64	0.0254967							0
P22059	Oxysterol-binding protein 1 OS=Homo sapiens OX=9606 GN=OSBP PE=1 SV=1 - [OSBP1_HUMAN]	3.47	1	1	1	1	43.24	3.47	1	1									807	89.3646	7.29834
	Sequence	# PSMs	# Proteins	# Protein Groups	Protein Group Accessions	Modifications	MH+ [Da]	q-Value	PEP	A2	IonScore A2	Exp Value A2	B2	IonScore B2	Exp Value B2	C2	IonScore C2	Exp Value C2	# Missed Cleavages
	GDMSDEDDENEFFDAPEIITMPENLGHK	1	1	1	P22059	S4(Phospho)	3275.31	0	3.936e-16	High	43.24	0.00303278							0
O00505	Importin subunit alpha-4 OS=Homo sapiens OX=9606 GN=KPNA3 PE=1 SV=2 - [IMA4_HUMAN]	3.45	1	1	1	1					25.23	3.45	1	1					521	57.7748	4.94482
	Sequence	# PSMs	# Proteins	# Protein Groups	Protein Group Accessions	Modifications	MH+ [Da]	q-Value	PEP	A2	IonScore A2	Exp Value A2	B2	IonScore B2	Exp Value B2	C2	IonScore C2	Exp Value C2	# Missed Cleavages
	NVPQEESLEDSDVDADFK	1	1	1	O00505	S11(Phospho)	2116.86	0	0.02105				High	25.23	0.185948				0
Q15084	Protein disulfide-isomerase A6 OS=Homo sapiens OX=9606 GN=PDIA6 PE=1 SV=1 - [PDIA6_HUMAN]	3.41	1	1	1	1					49.69	3.41	1	1					440	48.0913	5.08447
	Sequence	# PSMs	# Proteins	# Protein Groups	Protein Group Accessions	Modifications	MH+ [Da]	q-Value	PEP	A2	IonScore A2	Exp Value A2	B2	IonScore B2	Exp Value B2	C2	IonScore C2	Exp Value C2	# Missed Cleavages
	LAAVDATVNQVLASR	1	1	1	Q15084		1527.85	0	0.01906				High	49.69	0.000450539				0
E9PG73	Peptidyl-prolyl cis-trans isomerase G OS=Homo sapiens OX=9606 GN=PPIG PE=1 SV=1 - [E9PG73_HUMAN]	3.38	2	3	3	6					35.43	3.38	3	6					739	87.0365	10.3013
	Sequence	# PSMs	# Proteins	# Protein Groups	Protein Group Accessions	Modifications	MH+ [Da]	q-Value	PEP	A2	IonScore A2	Exp Value A2	B2	IonScore B2	Exp Value B2	C2	IonScore C2	Exp Value C2	# Missed Cleavages
	KFDHESSPGTDEDK	3	2	1	E9PG73	S7(Phospho); T10(Phospho)	1751.62	0	0.03628				High	27.58	0.0414633				1
	KFDHESSPGTDEDK	1	2	1	E9PG73	T10(Phospho)	1671.65	0	0.009783				High	26.35	0.101154				1
	KFDHESSPGTDEDKSG	1	2	1	E9PG73	S15(Phospho)	1815.71	0.002	0.06064				High	11.01	3.75646				2
	RSETPPHWR	1	2	1	E9PG73	T4(Phospho)	1245.55	0.007	0.2143				High	10.23	6.13627				1
Q99856	AT-rich interactive domain-containing protein 3A OS=Homo sapiens OX=9606 GN=ARID3A PE=1 SV=2 - [ARI3A_HUMAN]	3.37	1	1	1	1	42.05	3.37	1	1									593	62.85	4.90674
	Sequence	# PSMs	# Proteins	# Protein Groups	Protein Group Accessions	Modifications	MH+ [Da]	q-Value	PEP	A2	IonScore A2	Exp Value A2	B2	IonScore B2	Exp Value B2	C2	IonScore C2	Exp Value C2	# Missed Cleavages
	EGPGEEHFEDMASDEDMKPK	1	1	1	Q99856	S13(Phospho)	2357.9	0	3.936e-16	High	42.05	0.00249182							0
H0Y704	Zinc finger protein 185 (Fragment) OS=Homo sapiens OX=9606 GN=ZNF185 PE=1 SV=2 - [H0Y704_HUMAN]	3.35	3	1	1	1	0	3.35	1	1									448	47.4819	5.70654
	Sequence	# PSMs	# Proteins	# Protein Groups	Protein Group Accessions	Modifications	MH+ [Da]	q-Value	PEP	A2	IonScore A2	Exp Value A2	B2	IonScore B2	Exp Value B2	C2	IonScore C2	Exp Value C2	# Missed Cleavages
	RESCGSSVLTDFEGK	1	3	1	H0Y704	S3(Phospho); C4(Carbamidomethyl)	1751.73	0	4.471e-16	High	24.63	0.238807							1
A1L2Z2	MYH14 protein OS=Homo sapiens OX=9606 GN=MYH14 PE=1 SV=1 - [A1L2Z2_HUMAN]	3.29	2	1	1	1	32.91	3.29	1	1									638	73.3609	5.10986
	Sequence	# PSMs	# Proteins	# Protein Groups	Protein Group Accessions	Modifications	MH+ [Da]	q-Value	PEP	A2	IonScore A2	Exp Value A2	B2	IonScore B2	Exp Value B2	C2	IonScore C2	Exp Value C2	# Missed Cleavages
	LGQLEEELEEEQSNSELLNDR	1	2	1	A1L2Z2		2474.15	0	3.936e-16	High	32.91	0.056899							0
Q8IU81	Interferon regulatory factor 2-binding protein 1 OS=Homo sapiens OX=9606 GN=IRF2BP1 PE=1 SV=1 - [I2BP1_HUMAN]	3.25	1	1	1	1					20.38	3.25	1	1					584	61.649	8.17725
	Sequence	# PSMs	# Proteins	# Protein Groups	Protein Group Accessions	Modifications	MH+ [Da]	q-Value	PEP	A2	IonScore A2	Exp Value A2	B2	IonScore B2	Exp Value B2	C2	IonScore C2	Exp Value C2	# Missed Cleavages
	AGGASPAASSTAQPPTQHR	1	1	1	Q8IU81	S5(Phospho)	1871.84	0	0.0362				High	20.38	0.897896				0
Q6PD62	RNA polymerase-associated protein CTR9 homolog OS=Homo sapiens OX=9606 GN=CTR9 PE=1 SV=1 - [CTR9_HUMAN]	3.24	1	3	3	4	21.29	1.79	1	2	23.82	3.15	2	2					1173	133.42	6.771
	Sequence	# PSMs	# Proteins	# Protein Groups	Protein Group Accessions	Modifications	MH+ [Da]	q-Value	PEP	A2	IonScore A2	Exp Value A2	B2	IonScore B2	Exp Value B2	C2	IonScore C2	Exp Value C2	# Missed Cleavages
	GEEGSDDDETENGPKPK	1	1	1	Q6PD62	S5(Phospho)	1883.72	0	0.04497				High	23.82	0.172828				0
	GGEFDEFVNDDTDDDLPISK	1	1	1	Q6PD62	T12(Phospho)	2307.92	0	0.01902				High	16.36	1.36643				0
	KGGEFDEFVNDDTDDDLPISK	2	1	1	Q6PD62	T13(Phospho)	2436.02	0.001	0.001827	High	21.29	0.56841							1
D6RGZ6	Versican core protein (Fragment) OS=Homo sapiens OX=9606 GN=VCAN PE=1 SV=1 - [D6RGZ6_HUMAN]	3.23	2	2	2	4	51.34	3.23	2	3					22.29	1.94	1	1	1240	135.661	4.50049
	Sequence	# PSMs	# Proteins	# Protein Groups	Protein Group Accessions	Modifications	MH+ [Da]	q-Value	PEP	A2	IonScore A2	Exp Value A2	B2	IonScore B2	Exp Value B2	C2	IonScore C2	Exp Value C2	# Missed Cleavages
	QEVNPVRQEIESETTSEEQIQEEK	2	2	1	D6RGZ6	T14(Phospho)	2939.32	0	3.059e-14	High	38.02	0.0186553				High	22.29	0.675485	1
	MSDLSVIGHPIDSESK	2	2	1	D6RGZ6	S13(Phospho)	1794.8	0.001	0.001827	High	38.32	0.0120435							0
Q8ND76	Cyclin-Y OS=Homo sapiens OX=9606 GN=CCNY PE=1 SV=2 - [CCNY_HUMAN]	3.23	1	1	1	1	23.94	3.23	1	1									341	39.3119	7.1958
	Sequence	# PSMs	# Proteins	# Protein Groups	Protein Group Accessions	Modifications	MH+ [Da]	q-Value	PEP	A2	IonScore A2	Exp Value A2	B2	IonScore B2	Exp Value B2	C2	IonScore C2	Exp Value C2	# Missed Cleavages
	SASADNLTLPR	1	1	1	Q8ND76	S1(Phospho)	1224.56	0.001	0.001827	High	23.94	0.26681							0
A0A5F9ZHX4	Peregrin OS=Homo sapiens OX=9606 GN=BRPF1 PE=1 SV=1 - [A0A5F9ZHX4_HUMAN]	3.23	4	1	1	1	29.29	3.23	1	1									681	78.0416	7.18115
	Sequence	# PSMs	# Proteins	# Protein Groups	Protein Group Accessions	Modifications	MH+ [Da]	q-Value	PEP	A2	IonScore A2	Exp Value A2	B2	IonScore B2	Exp Value B2	C2	IonScore C2	Exp Value C2	# Missed Cleavages
	RLPALSHSEGEEDEDEEEDEGK	1	4	1	A0A5F9ZHX4	S6(Phospho); S8(Phospho)	2660	0.001	0.0009097	High	29.29	0.0491062							1
O00567	Nucleolar protein 56 OS=Homo sapiens OX=9606 GN=NOP56 PE=1 SV=4 - [NOP56_HUMAN]	3.2	1	1	1	1	32	3.2	1	1									594	66.0087	9.18799
	Sequence	# PSMs	# Proteins	# Protein Groups	Protein Group Accessions	Modifications	MH+ [Da]	q-Value	PEP	A2	IonScore A2	Exp Value A2	B2	IonScore B2	Exp Value B2	C2	IonScore C2	Exp Value C2	# Missed Cleavages
	EELMSSDLEETAGSTSIPK	1	1	1	O00567	S6(Phospho)	2103.91	0	8.949e-14	High	32	0.0551141							0
Q6UN15	Pre-mRNA 3'-end-processing factor FIP1 OS=Homo sapiens OX=9606 GN=FIP1L1 PE=1 SV=1 - [FIP1_HUMAN]	3.2	1	4	4	13	48.1459	3.2	4	5	46.72	2.53	1	3	44.6504	3.2	4	5	594	66.4865	5.59229
	Sequence	# PSMs	# Proteins	# Protein Groups	Protein Group Accessions	Modifications	MH+ [Da]	q-Value	PEP	A2	IonScore A2	Exp Value A2	B2	IonScore B2	Exp Value B2	C2	IonScore C2	Exp Value C2	# Missed Cleavages
	DHSPTPSVFNSDEER	4	1	1	Q6UN15	S3(Phospho)	1796.71	0	0.01758	High	39.58	0.00563437	High	44.08	0.00196007	High	33.83	0.0191682	0
	DHSPTPSVFNSDEERYR	3	1	1	Q6UN15	S3(Phospho); S11(Phospho)	2195.83	0	3.179e-05	High	23.48	0.197224				High	36.96	0.00796428	1
	ERDHSPTPSVFNSDEERYR	2	1	1	Q6UN15	S5(Phospho); S13(Phospho)	2480.99	0	1.389e-08	High	17.49	1.08992				High	26.11	0.135311	2
	DHSPTPSVFNSDEER	2	1	1	Q6UN15	S3(Phospho); S11(Phospho)	1876.68	0	0.04327				High	25.64	0.0810506				0
	ERDHSPTPSVFNSDEER	2	1	1	Q6UN15	S5(Phospho)	2081.86	0.001	0.0009097	High	29.43	0.073147				High	20.25	0.593814	1
A0A0A0MRN5	Opioid growth factor receptor OS=Homo sapiens OX=9606 GN=OGFR PE=1 SV=1 - [A0A0A0MRN5_HUMAN]	3.2	2	1	1	1					35.25	3.2	1	1					625	67.154	5.19873
	Sequence	# PSMs	# Proteins	# Protein Groups	Protein Group Accessions	Modifications	MH+ [Da]	q-Value	PEP	A2	IonScore A2	Exp Value A2	B2	IonScore B2	Exp Value B2	C2	IonScore C2	Exp Value C2	# Missed Cleavages
	KVEEEGSPGDPDHEASTQGR	1	2	1	A0A0A0MRN5	S7(Phospho)	2204.91	0.005	0.2				High	35.25	0.0219276				1
Q8TE67	Epidermal growth factor receptor kinase substrate 8-like protein 3 OS=Homo sapiens OX=9606 GN=EPS8L3 PE=1 SV=2 - [ES8L3_HUMAN]	3.2	1	1	1	1									25.63	3.2	1	1	593	66.8194	7.98682
	Sequence	# PSMs	# Proteins	# Protein Groups	Protein Group Accessions	Modifications	MH+ [Da]	q-Value	PEP	A2	IonScore A2	Exp Value A2	B2	IonScore B2	Exp Value B2	C2	IonScore C2	Exp Value C2	# Missed Cleavages
	SSSPEDPERDEEVLNHVLR	1	1	1	Q8TE67	S3(Phospho)	2288.01	0	1.427e-05							High	25.63	0.267509	1
Q01831	DNA repair protein complementing XP-C cells OS=Homo sapiens OX=9606 GN=XPC PE=1 SV=4 - [XPC_HUMAN]	3.19	1	1	1	2	51.41	3.19	1	1					31.85	3.19	1	1	940	105.887	8.89502
	Sequence	# PSMs	# Proteins	# Protein Groups	Protein Group Accessions	Modifications	MH+ [Da]	q-Value	PEP	A2	IonScore A2	Exp Value A2	B2	IonScore B2	Exp Value B2	C2	IonScore C2	Exp Value C2	# Missed Cleavages
	SEAAAPHTDAGGGLSSDEEEGTSSQAEAAR	2	1	1	Q01831	S15(Phospho); S16(Phospho)	3048.18	0	3.936e-16	High	51.41	0.000393187				High	31.85	0.031089	0
P52756	RNA-binding protein 5 OS=Homo sapiens OX=9606 GN=RBM5 PE=1 SV=2 - [RBM5_HUMAN]	3.19	1	2	2	2	87.29	3.19	2	2									815	92.097	6.27783
	Sequence	# PSMs	# Proteins	# Protein Groups	Protein Group Accessions	Modifications	MH+ [Da]	q-Value	PEP	A2	IonScore A2	Exp Value A2	B2	IonScore B2	Exp Value B2	C2	IonScore C2	Exp Value C2	# Missed Cleavages
	GLVAAYSGDSDNEEELVER	1	1	1	P52756	S10(Phospho)	2132.91	0	3.936e-16	High	77.33	1.49606e-06							0
	GLVAAYSGDSDNEEELVERLESEEEK	1	1	1	P52756	S10(Phospho)	2977.29	0	1.936e-08	High	34.96	0.0315164							1
E5RGS2	Receptor expression-enhancing protein OS=Homo sapiens OX=9606 GN=REEP4 PE=1 SV=1 - [E5RGS2_HUMAN]	3.19	2	1	1	1	31.08	3.19	1	1									251	28.1955	9.02686
	Sequence	# PSMs	# Proteins	# Protein Groups	Protein Group Accessions	Modifications	MH+ [Da]	q-Value	PEP	A2	IonScore A2	Exp Value A2	B2	IonScore B2	Exp Value B2	C2	IonScore C2	Exp Value C2	# Missed Cleavages
	SFSMQDLR	1	2	1	E5RGS2	S3(Phospho)	1063.43	0.001	0.0009097	High	31.08	0.0326359							0
A0A087WT54	Hepatoma-derived growth factor-related protein 2 (Fragment) OS=Homo sapiens OX=9606 GN=HDGFL2 PE=1 SV=1 - [A0A087WT54_HUMAN]	3.17	2	1	1	2	23.61	3.17	1	1					23.89	3.17	1	1	473	51.8015	8.85107
	Sequence	# PSMs	# Proteins	# Protein Groups	Protein Group Accessions	Modifications	MH+ [Da]	q-Value	PEP	A2	IonScore A2	Exp Value A2	B2	IonScore B2	Exp Value B2	C2	IonScore C2	Exp Value C2	# Missed Cleavages
	ADSDGAKPEPVAMAR	2	2	1	A0A087WT54	S3(Phospho)	1594.68	0.001	0.009381	High	23.61	0.282647				High	23.89	0.267449	0
Q92614	Unconventional myosin-XVIIIa OS=Homo sapiens OX=9606 GN=MYO18A PE=1 SV=3 - [MY18A_HUMAN]	3.16	2	4	4	8	57.62	2.04	2	3	37.1512	2.14	3	4	0	0.68	1	1	2054	232.971	6.30322
	Sequence	# PSMs	# Proteins	# Protein Groups	Protein Group Accessions	Modifications	MH+ [Da]	q-Value	PEP	A2	IonScore A2	Exp Value A2	B2	IonScore B2	Exp Value B2	C2	IonScore C2	Exp Value C2	# Missed Cleavages
	SLAPDRSDDEHDPLDNTSRPR	2	2	1	Q92614	S7(Phospho)	2473.08	0	3.936e-16	High	43.85	0.00403031							1
	NKLEGDSDVDSELEDRVDGVK	1	1	1	Q92614	S11(Phospho)	2399.06	0	0.0004153	High	33.77	0.0432772							2
	YSHSYLSDSDTEAK	3	2	1	Q92614	S7(Phospho); S9(Phospho)	1762.63	0	0.01167				High	28.25	0.0349371	High	21.16	0.160392	0
	NKLEGDSDVDSELEDRVDGVK	1	1	1	Q92614	S7(Phospho); S11(Phospho)	2479.03	0	0.02626				High	13.05	3.80506				2
	SSSPTSYWK	1	2	1	Q92614	S3(Phospho)	1122.45	0.002	0.07316				High	32.76	0.0204715				0
C9JPC9	Ubiquitin carboxyl-terminal hydrolase 42 (Fragment) OS=Homo sapiens OX=9606 GN=USP42 PE=1 SV=9 - [C9JPC9_HUMAN]	3.16	2	1	1	1					43.16	3.16	1	1					1043	114.372	8.11865
	Sequence	# PSMs	# Proteins	# Protein Groups	Protein Group Accessions	Modifications	MH+ [Da]	q-Value	PEP	A2	IonScore A2	Exp Value A2	B2	IonScore B2	Exp Value B2	C2	IonScore C2	Exp Value C2	# Missed Cleavages
	GPPEDRDAEPQPGSPAAESLEEPDAAAGLSSTK	1	2	1	C9JPC9	S14(Phospho)	3356.48	0	0.004377				High	43.16	0.00526776				1
A0A0G2JMS7	Protein scribble homolog OS=Homo sapiens OX=9606 GN=SCRIB PE=1 SV=1 - [A0A0G2JMS7_HUMAN]	3.16	5	2	2	2					46.72	3.16	2	2					1549	165.172	4.99561
	Sequence	# PSMs	# Proteins	# Protein Groups	Protein Group Accessions	Modifications	MH+ [Da]	q-Value	PEP	A2	IonScore A2	Exp Value A2	B2	IonScore B2	Exp Value B2	C2	IonScore C2	Exp Value C2	# Missed Cleavages
	RSEACPCQPDSGSPLPAEEEK	1	5	1	A0A0G2JMS7	C5(Carbamidomethyl); C7(Carbamidomethyl); S13(Phospho)	2423.99	0	0.003253				High	46.72	0.00155993				1
	LALDGETLGEEEQEDEQPPWASPSPTSR	1	5	1	A0A0G2JMS7	S27(Phospho)	3148.36	0.002	0.1631				High	12.63	5.74683				0
Q86VM9	Zinc finger CCCH domain-containing protein 18 OS=Homo sapiens OX=9606 GN=ZC3H18 PE=1 SV=2 - [ZCH18_HUMAN]	3.15	3	2	2	2					47.69	3.15	2	2					953	106.316	8.32373
	Sequence	# PSMs	# Proteins	# Protein Groups	Protein Group Accessions	Modifications	MH+ [Da]	q-Value	PEP	A2	IonScore A2	Exp Value A2	B2	IonScore B2	Exp Value B2	C2	IonScore C2	Exp Value C2	# Missed Cleavages
	LGVSVSPSR	1	3	1	Q86VM9	S6(Phospho)	981.477	0	0.03532				High	49.69	0.000724406				0
	GPSQEEEDNHSDEEDRASEPK	1	2	1	Q86VM9	S11(Phospho)	2464.94	0.002	0.1245				High	18.5	0.641998				1
Q9Y487	V-type proton ATPase 116 kDa subunit a2 OS=Homo sapiens OX=9606 GN=ATP6V0A2 PE=1 SV=2 - [VPP2_HUMAN]	3.15	1	1	1	1					32.43	3.15	1	1					856	98.0183	6.60986
	Sequence	# PSMs	# Proteins	# Protein Groups	Protein Group Accessions	Modifications	MH+ [Da]	q-Value	PEP	A2	IonScore A2	Exp Value A2	B2	IonScore B2	Exp Value B2	C2	IonScore C2	Exp Value C2	# Missed Cleavages
	KDSEEEVSLLGSQDIEEGNHQVEDGCR	1	1	1	Q9Y487	S3(Phospho); C26(Carbamidomethyl)	3139.32	0	0.03019				High	32.43	0.0522046				1
P01042	Kininogen-1 OS=Homo sapiens OX=9606 GN=KNG1 PE=1 SV=2 - [KNG1_HUMAN]	3.11	1	2	2	3	48	3.11	2	3									644	71.9122	6.81494
	Sequence	# PSMs	# Proteins	# Protein Groups	Protein Group Accessions	Modifications	MH+ [Da]	q-Value	PEP	A2	IonScore A2	Exp Value A2	B2	IonScore B2	Exp Value B2	C2	IonScore C2	Exp Value C2	# Missed Cleavages
	ETTCSKESNEELTESCETK	2	1	1	P01042	T2(Phospho); C4(Carbamidomethyl); C16(Carbamidomethyl)	2341.91	0	3.936e-16	High	38.15	0.00691286							1
	ETTCSKESNEELTESCETKK	1	1	1	P01042	C4(Carbamidomethyl); S8(Phospho); C16(Carbamidomethyl)	2470	0.001	0.0009097	High	21.74	0.452842							2
P49411	Elongation factor Tu, mitochondrial OS=Homo sapiens OX=9606 GN=TUFM PE=1 SV=2 - [EFTU_HUMAN]	3.1	1	1	1	1	31.6	3.1	1	1									452	49.5102	7.60596
	Sequence	# PSMs	# Proteins	# Protein Groups	Protein Group Accessions	Modifications	MH+ [Da]	q-Value	PEP	A2	IonScore A2	Exp Value A2	B2	IonScore B2	Exp Value B2	C2	IonScore C2	Exp Value C2	# Missed Cleavages
	LLDAVDTYIPVPAR	1	1	1	P49411		1542.85	0	2.979e-09	High	31.6	0.0327236							0
[truncated: 434 more rows]
